# Supplementary material
Source: publisher site journal article supplement (https://www.dovepress.com/article/supplementary_file/596504/596504%20Supplementary%20Materials.xlsx)
Supplement: Supplementary file 1 [file 596504%20Supplementary%20Materials.xlsx]

## Sheet: Table S1
Table S1. Causal inference of plasma miRNAs in the discovery cohort with respect to Atopic Dermatitis.
exposure	method	nsnp	b	se	pval	lo_ci	up_ci	or	or_lci95	or_uci95	F_stat	Steiger_Direction	Steiger_Pval	outcome_type	phase
miR-197-3p	Wald ratio	1	0.192853	0.137299	0.160134	-0.0762529	0.461959	1.2127	0.926582	1.58718	52.3715	TRUE	1.75061e-12	Atopic_Dermatitis	Discovery (Nikpay Cis)
miR-199a-3p	Inverse variance weighted	2	0.0849941	0.181584	0.639735	-0.270911	0.440899	1.08871	0.762684	1.5541	36.0925	TRUE	4.1375e-17	Atopic_Dermatitis	Discovery (Nikpay Cis)
miR-342-3p	Inverse variance weighted	3	-0.0564392	0.0579541	0.330125	-0.170029	0.0571507	0.945124	0.84364	1.05882	58.959	TRUE	8.39661e-43	Atopic_Dermatitis	Discovery (Nikpay Cis)
miR-345-5p	Wald ratio	1	-0.0928571	0.0830222	0.26337	-0.255581	0.0698663	0.911324	0.774467	1.07236	82.1242	TRUE	1.21589e-18	Atopic_Dermatitis	Discovery (Nikpay Cis)
miR-151a-3p	Wald ratio	1	-0.0500071	0.143758	0.727949	-0.331773	0.231759	0.951223	0.71765	1.26082	110.77	TRUE	1.43511e-24	Atopic_Dermatitis	Discovery (Nikpay Cis)
miR-326	Wald ratio	1	-0.190614	0.222685	0.392007	-0.627077	0.245848	0.826451	0.534151	1.27871	21.5869	TRUE	5.0438e-06	Atopic_Dermatitis	Discovery (Nikpay Cis)
miR-33a-5p	Wald ratio	1	0.331035	0.153737	0.0312987	0.0297104	0.63236	1.39241	1.03016	1.88205	30.141	TRUE	1.09435e-07	Atopic_Dermatitis	Discovery (Nikpay Cis)
miR-30b-5p	Inverse variance weighted	4	0.185558	0.10007	0.0636984	-0.0105789	0.381695	1.20389	0.989477	1.46476	75.5041	TRUE	3.08497e-73	Atopic_Dermatitis	Discovery (Nikpay Cis)
miR-27a-3p	Wald ratio	1	-0.139225	0.312711	0.656161	-0.752138	0.473688	0.870032	0.471358	1.60591	23.9247	TRUE	1.36928e-06	Atopic_Dermatitis	Discovery (Nikpay Cis)
miR-139-5p	Wald ratio	1	0.0822145	0.0608002	0.176309	-0.036954	0.201383	1.08569	0.96372	1.22309	70.6466	TRUE	2.94838e-16	Atopic_Dermatitis	Discovery (Nikpay Cis)
miR-199a-5p	Wald ratio	1	-0.0337598	0.140264	0.809797	-0.308677	0.241157	0.966804	0.734418	1.27272	36.2301	TRUE	2.76018e-09	Atopic_Dermatitis	Discovery (Nikpay Cis)
miR-671-3p	Wald ratio	1	0.0017563	0.11525	0.987841	-0.224133	0.227645	1.00176	0.799209	1.25564	22.1297	TRUE	2.97922e-06	Atopic_Dermatitis	Discovery (Nikpay Cis)
miR-4707-3p	Wald ratio	1	-0.00751044	0.0269573	0.780548	-0.0603467	0.0453258	0.992518	0.941438	1.04637	379.491	TRUE	1.42042e-72	Atopic_Dermatitis	Discovery (Nikpay Cis)
miR-3689a-3p	Wald ratio	1	0.10391	0.0646448	0.107966	-0.0227937	0.230614	1.1095	0.977464	1.25937	40.7459	TRUE	5.15644e-10	Atopic_Dermatitis	Discovery (Nikpay Cis)
miR-941	Wald ratio	1	-0.171931	0.0572564	0.00267491	-0.284153	-0.0597081	0.842038	0.752651	0.942039	45.0349	TRUE	1.1451e-10	Atopic_Dermatitis	Discovery (Nikpay Cis)
miR-127-3p	Wald ratio	1	-0.167716	0.127824	0.18949	-0.418251	0.0828185	0.845594	0.658197	1.08634	25.0525	TRUE	1.02218e-06	Atopic_Dermatitis	Discovery (Nikpay Cis)
miR-1307-5p	Wald ratio	1	0.144254	0.129137	0.263966	-0.108854	0.397362	1.15518	0.896862	1.4879	48.9522	TRUE	7.99166e-12	Atopic_Dermatitis	Discovery (Nikpay Cis)
miR-744-5p	Wald ratio	1	-0.0439058	0.0949848	0.643909	-0.230076	0.142264	0.957044	0.794473	1.15288	71.99	TRUE	9.88396e-17	Atopic_Dermatitis	Discovery (Nikpay Cis)
miR-146a-5p	Wald ratio	1	-0.328035	0.124973	0.00866874	-0.572981	-0.083088	0.720338	0.563842	0.92027	48.913	TRUE	1.56511e-11	Atopic_Dermatitis	Discovery (Nikpay Cis)
miR-204-5p	Wald ratio	1	0.0237396	0.0482975	0.623053	-0.0709235	0.118403	1.02402	0.931533	1.1257	44.5414	TRUE	5.18793e-11	Atopic_Dermatitis	Discovery (Nikpay Cis)
miR-1908-5p	Wald ratio	1	0.279693	0.0572142	1.01592e-06	0.167553	0.391833	1.32272	1.18241	1.47969	148.162	TRUE	2.00005e-30	Atopic_Dermatitis	Discovery (Nikpay Cis)
miR-323b-3p	Wald ratio	1	0.0632901	0.0418453	0.130412	-0.0187266	0.145307	1.06534	0.981448	1.15639	125.553	TRUE	3.92136e-27	Atopic_Dermatitis	Discovery (Nikpay Cis)
miR-4326	Wald ratio	1	0.060816	0.0519591	0.241816	-0.0410238	0.162656	1.0627	0.959806	1.17663	39.4648	TRUE	8.09652e-10	Atopic_Dermatitis	Discovery (Nikpay Cis)
miR-625-5p	Inverse variance weighted	3	-0.00306342	0.0441723	0.94471	-0.0896411	0.0835142	0.996941	0.914259	1.0871	55.67	TRUE	1.21995e-39	Atopic_Dermatitis	Discovery (Nikpay Cis)
miR-145-5p	Inverse variance weighted	2	0.0542771	0.0696915	0.436086	-0.0823183	0.190872	1.05578	0.920979	1.21031	29.3368	TRUE	2.08685e-14	Atopic_Dermatitis	Discovery (Nikpay Cis)
miR-329-3p	Wald ratio	1	0.00647823	0.114002	0.954684	-0.216966	0.229923	1.0065	0.804957	1.2585	22.609	TRUE	2.36459e-06	Atopic_Dermatitis	Discovery (Nikpay Cis)
let-7g-5p	Wald ratio	1	-0.046883	0.375621	0.900671	-0.783101	0.689335	0.954199	0.456987	1.99239	22.2655	TRUE	2.87437e-06	Atopic_Dermatitis	Discovery (Nikpay Cis)
miR-339-5p	Inverse variance weighted	4	0.114955	0.0629998	0.0680486	-0.00852484	0.238434	1.12182	0.991511	1.26926	58.3977	TRUE	1.44329e-58	Atopic_Dermatitis	Discovery (Nikpay Cis)
miR-185-5p	Wald ratio	1	0.0625298	0.179514	0.727594	-0.289318	0.414378	1.06453	0.748774	1.51343	52.7164	TRUE	9.24917e-13	Atopic_Dermatitis	Discovery (Nikpay Cis)
miR-143-3p	Inverse variance weighted	2	-0.0072788	0.0469965	0.876916	-0.0993919	0.0848343	0.992748	0.905388	1.08854	35.7485	TRUE	3.05803e-17	Atopic_Dermatitis	Discovery (Nikpay Cis)
miR-101-3p	Wald ratio	1	-0.288404	0.19074	0.130527	-0.662255	0.0854466	0.749459	0.515687	1.0892	30.3861	TRUE	7.81686e-08	Atopic_Dermatitis	Discovery (Nikpay Cis)
miR-335-5p	Wald ratio	1	-0.0140203	0.0967029	0.884724	-0.203558	0.175517	0.986077	0.815823	1.19186	53.2421	TRUE	6.54482e-13	Atopic_Dermatitis	Discovery (Nikpay Cis)
miR-29c-3p	Wald ratio	1	-0.304945	0.266852	0.253144	-0.827975	0.218086	0.737164	0.436933	1.24369	24.3262	TRUE	1.3926e-06	Atopic_Dermatitis	Discovery (Nikpay Cis)
miR-152-3p	Inverse variance weighted	4	-0.0011538	0.0554179	0.983389	-0.109773	0.107465	0.998847	0.896038	1.11345	41.5005	TRUE	2.79358e-41	Atopic_Dermatitis	Discovery (Nikpay Cis)
miR-140-5p	Wald ratio	1	0.00967299	0.122848	0.93724	-0.231109	0.250455	1.00972	0.793653	1.28461	47.0718	TRUE	1.26827e-11	Atopic_Dermatitis	Discovery (Nikpay Cis)
miR-27b-3p	Inverse variance weighted	3	0.0404559	0.100552	0.687436	-0.156626	0.237538	1.04129	0.855024	1.26812	108.875	TRUE	3.59178e-72	Atopic_Dermatitis	Discovery (Nikpay Cis)
miR-331-3p	Wald ratio	1	0.0680733	0.209726	0.745498	-0.342991	0.479137	1.07044	0.709645	1.61468	23.5363	TRUE	1.60499e-06	Atopic_Dermatitis	Discovery (Nikpay Cis)
miR-2355-3p	Wald ratio	1	-0.122488	0.0832268	0.141091	-0.285613	0.0406363	0.884716	0.751554	1.04147	28.0739	TRUE	2.39914e-07	Atopic_Dermatitis	Discovery (Nikpay Cis)
miR-103a-3p	Wald ratio	1	-0.271096	0.299275	0.36502	-0.857676	0.315484	0.762543	0.424147	1.37092	25.5833	TRUE	6.88941e-07	Atopic_Dermatitis	Discovery (Nikpay Cis)
miR-2355-5p	Wald ratio	1	-0.104814	0.0761144	0.168493	-0.253999	0.0443699	0.900492	0.775693	1.04537	34.2106	TRUE	1.13478e-08	Atopic_Dermatitis	Discovery (Nikpay Cis)
miR-584-5p	Inverse variance weighted	3	0.0369531	0.0348336	0.28876	-0.0313208	0.105227	1.03764	0.969165	1.11096	177.681	TRUE	1.19919e-116	Atopic_Dermatitis	Discovery (Nikpay Cis)
miR-130a-3p	Inverse variance weighted	5	-0.011686	0.042476	0.783224	-0.0949389	0.0715669	0.988382	0.909428	1.07419	271.498	TRUE	0	Atopic_Dermatitis	Discovery (Nikpay Cis)
miR-3667-5p	Wald ratio	1	0.00380157	0.0941547	0.967794	-0.180742	0.188345	1.00381	0.834651	1.20725	25.0767	TRUE	6.73811e-07	Atopic_Dermatitis	Discovery (Nikpay Cis)
miR-451a	Wald ratio	1	-0.0572907	0.094892	0.546012	-0.243279	0.128698	0.94432	0.784053	1.13735	35.7485	TRUE	4.01083e-09	Atopic_Dermatitis	Discovery (Nikpay Cis)
miR-130b-5p	Wald ratio	1	-0.152959	0.0862171	0.0760438	-0.321945	0.0160263	0.858165	0.724738	1.01616	56.3176	TRUE	3.17647e-13	Atopic_Dermatitis	Discovery (Nikpay Cis)
miR-23b-3p	Wald ratio	1	0.0603024	0.366243	0.869218	-0.657533	0.778138	1.06216	0.518128	2.17741	28.5753	TRUE	1.20774e-07	Atopic_Dermatitis	Discovery (Nikpay Cis)
let-7d-5p	Wald ratio	1	-0.487533	0.279973	0.0816209	-1.03628	0.0612139	0.61414	0.354772	1.06313	32.473	TRUE	3.0421e-08	Atopic_Dermatitis	Discovery (Nikpay Cis)
miR-21-5p	Wald ratio	1	0.0913305	0.194634	0.638896	-0.290152	0.472813	1.09563	0.74815	1.6045	41.5189	TRUE	2.24432e-10	Atopic_Dermatitis	Discovery (Nikpay Cis)
miR-338-3p	Inverse variance weighted	3	0.0200154	0.0595662	0.736856	-0.0967343	0.136765	1.02022	0.907797	1.14656	45.9899	TRUE	2.99254e-33	Atopic_Dermatitis	Discovery (Nikpay Cis)
miR-490-5p	Wald ratio	1	-0.101459	0.0655545	0.121694	-0.229946	0.0270279	0.903518	0.794577	1.0274	24.5816	TRUE	1.39035e-06	Atopic_Dermatitis	Discovery (Nikpay Cis)
miR-30d-5p	Inverse variance weighted	2	0.130088	0.122929	0.289944	-0.110852	0.371028	1.13893	0.895072	1.44922	101.91	TRUE	4.68202e-45	Atopic_Dermatitis	Discovery (Nikpay Cis)
miR-6810-3p	Wald ratio	1	-0.128594	0.154826	0.406217	-0.432052	0.174865	0.879331	0.649175	1.19109	24.0028	TRUE	1.48564e-06	Atopic_Dermatitis	Discovery (Nikpay Cis)
miR-574-3p	Wald ratio	1	0.078192	0.130483	0.549005	-0.177554	0.333938	1.08133	0.837316	1.39646	46.1646	TRUE	2.46625e-11	Atopic_Dermatitis	Discovery (Nikpay Cis)
miR-146a-3p	Wald ratio	1	-0.283218	0.0997037	0.00450291	-0.478637	-0.0877988	0.753355	0.619627	0.915945	22.1045	TRUE	7.00684e-06	Atopic_Dermatitis	Discovery (Nikpay Cis)
miR-4433b-5p	Inverse variance weighted	4	-0.0476439	0.024083	0.0478925	-0.0948465	-0.000441231	0.953473	0.909513	0.999559	104.721	TRUE	7.26582e-103	Atopic_Dermatitis	Discovery (Nikpay Cis)
miR-181b-5p	Inverse variance weighted	3	-0.111459	0.0491262	0.0232785	-0.207746	-0.0151717	0.894528	0.812413	0.984943	48.2815	TRUE	8.67991e-34	Atopic_Dermatitis	Discovery (Nikpay Cis)
let-7a-5p	Wald ratio	1	-0.882579	0.340844	0.00961452	-1.55063	-0.214525	0.413715	0.212114	0.806925	29.8375	TRUE	1.4753e-07	Atopic_Dermatitis	Discovery (Nikpay Cis)
miR-139-3p	Inverse variance weighted	3	0.0494872	0.0514629	0.336245	-0.05138	0.150354	1.05073	0.949918	1.16225	42.0141	TRUE	2.56592e-30	Atopic_Dermatitis	Discovery (Nikpay Cis)
miR-148a-3p	Wald ratio	1	0.284434	0.123061	0.0208154	0.0432335	0.525634	1.32901	1.04418	1.69153	27.5606	TRUE	4.08563e-07	Atopic_Dermatitis	Discovery (Nikpay Cis)
miR-181a-3p	Inverse variance weighted	2	-0.0848649	0.0931063	0.36204	-0.267353	0.0976234	0.918636	0.765403	1.10255	58.2992	TRUE	3.56433e-26	Atopic_Dermatitis	Discovery (Nikpay Cis)
miR-99b-5p	Inverse variance weighted	2	-0.295852	0.0965904	0.00219161	-0.48517	-0.106535	0.743897	0.615593	0.898943	25.9124	TRUE	1.89906e-12	Atopic_Dermatitis	Discovery (Nikpay Cis)
let-7e-5p	Wald ratio	1	-0.279966	0.133173	0.035529	-0.540984	-0.0189474	0.755809	0.582175	0.981231	28.5623	TRUE	2.32845e-07	Atopic_Dermatitis	Discovery (Nikpay Cis)
miR-181a-5p	Inverse variance weighted	5	-0.0651781	0.0358943	0.069396	-0.135531	0.00517479	0.936901	0.873252	1.00519	182.05	TRUE	9.40517e-252	Atopic_Dermatitis	Discovery (Nikpay Cis)
miR-136-5p	Wald ratio	1	-0.233772	0.102774	0.0229291	-0.43521	-0.0323343	0.791542	0.647129	0.968183	36.0074	TRUE	6.60421e-09	Atopic_Dermatitis	Discovery (Nikpay Cis)
miR-26a-5p	Wald ratio	1	0.229099	0.507515	0.651691	-0.765631	1.22383	1.25747	0.465041	3.40018	24.8217	TRUE	8.75239e-07	Atopic_Dermatitis	Discovery (Nikpay Cis)
miR-130b-3p	Inverse variance weighted	2	-0.051154	0.0684024	0.454557	-0.185223	0.0829146	0.950132	0.830919	1.08645	200.459	TRUE	2.19279e-92	Atopic_Dermatitis	Discovery (Nikpay Cis)
miR-574-5p	Wald ratio	1	0.122147	0.203833	0.549005	-0.277365	0.52166	1.12992	0.757778	1.68482	21.4387	TRUE	5.04501e-06	Atopic_Dermatitis	Discovery (Nikpay Cis)
miR-6891-3p	Wald ratio	1	-0.230618	0.098752	0.0195263	-0.424172	-0.0370644	0.794042	0.654311	0.963614	35.3173	TRUE	9.47457e-09	Atopic_Dermatitis	Discovery (Nikpay Cis)
miR-133a-3p	Inverse variance weighted	2	0.0684797	0.0221518	0.00199225	0.0250622	0.111897	1.07088	1.02538	1.1184	91.846	TRUE	2.86083e-41	Atopic_Dermatitis	Discovery (Nikpay Cis)
miR-125a-5p	Wald ratio	1	-0.296501	0.079872	0.000205466	-0.45305	-0.139952	0.743415	0.635686	0.8694	57.0324	TRUE	5.42727e-13	Atopic_Dermatitis	Discovery (Nikpay Cis)

## Sheet: Table S2
Table S2. Causal inference of plasma miRNAs in the validation cohort with respect to Atopic Dermatitis.
exposure	method	nsnp	b	se	pval	lo_ci	up_ci	or	or_lci95	or_uci95	F_stat	Steiger_Direction	Steiger_Pval	outcome_type	phase
miR-1908-5p	Inverse variance weighted	2	0.245363	0.0704496	0.000496185	0.107281	0.383444	1.27808	1.11325	1.46733	85.8616	TRUE	8.29738e-37	Atopic_Dermatitis	Validation (Nikpay Trans)
miR-941	Inverse variance weighted	9	-0.0169821	0.0293042	0.562245	-0.0744183	0.0404542	0.983161	0.928283	1.04128	26.1583	TRUE	1.89623e-63	Atopic_Dermatitis	Validation (Nikpay Trans)
miR-6891-3p	Inverse variance weighted	3	0.109497	0.1624	0.500158	-0.208807	0.4278	1.11572	0.811552	1.53388	28.7992	TRUE	4.42199e-20	Atopic_Dermatitis	Validation (Nikpay Trans)
miR-146a-5p	Inverse variance weighted	11	0.0162903	0.0733148	0.82416	-0.127407	0.159987	1.01642	0.880376	1.1735	25.2945	TRUE	1.07576e-78	Atopic_Dermatitis	Validation (Nikpay Trans)
miR-136-5p	Inverse variance weighted	6	-0.0124401	0.0934037	0.894046	-0.195511	0.170631	0.987637	0.822414	1.18605	25.7124	TRUE	3.26418e-38	Atopic_Dermatitis	Validation (Nikpay Trans)
miR-133a-3p	Inverse variance weighted	2	0.0684797	0.0221518	0.00199225	0.0250622	0.111897	1.07088	1.02538	1.1184	91.846	TRUE	2.86083e-41	Atopic_Dermatitis	Validation (Nikpay Trans)
let-7a-5p	Inverse variance weighted	2	-0.716472	0.440852	0.10412	-1.58054	0.147598	0.488473	0.205864	1.15905	26.7344	TRUE	6.80385e-13	Atopic_Dermatitis	Validation (Nikpay Trans)
miR-125a-5p	Inverse variance weighted	7	-0.106892	0.0724159	0.13992	-0.248828	0.0350429	0.898622	0.779714	1.03566	27.8728	TRUE	2.07883e-49	Atopic_Dermatitis	Validation (Nikpay Trans)
miR-181b-5p	Inverse variance weighted	8	-0.105574	0.0403588	0.0088996	-0.184677	-0.0264708	0.899808	0.831373	0.973876	32.4777	TRUE	2.44971e-69	Atopic_Dermatitis	Validation (Nikpay Trans)
miR-33a-5p	Inverse variance weighted	5	0.145406	0.0967052	0.132683	-0.0441359	0.334949	1.15651	0.956824	1.39787	24.5062	TRUE	1.68713e-29	Atopic_Dermatitis	Validation (Nikpay Trans)
miR-4433b-5p	Inverse variance weighted	9	-0.0376173	0.0208166	0.0707498	-0.0784178	0.00318328	0.963081	0.924578	1.00319	61.2279	TRUE	1.38466e-180	Atopic_Dermatitis	Validation (Nikpay Trans)
miR-99b-5p	Inverse variance weighted	5	-0.124069	0.0986955	0.208721	-0.317512	0.0693739	0.883319	0.727958	1.07184	23.5292	TRUE	1.65345e-28	Atopic_Dermatitis	Validation (Nikpay Trans)
miR-148a-3p	Inverse variance weighted	7	-0.0417043	0.0745006	0.575627	-0.187726	0.104317	0.959153	0.828842	1.10995	23.4321	TRUE	3.68881e-41	Atopic_Dermatitis	Validation (Nikpay Trans)
let-7e-5p	Inverse variance weighted	5	-0.140619	0.0683913	0.039774	-0.274665	-0.00657159	0.868821	0.759826	0.99345	23.5957	TRUE	7.92819e-29	Atopic_Dermatitis	Validation (Nikpay Trans)
miR-146a-3p	Inverse variance weighted	9	0.000926937	0.0631397	0.988287	-0.122827	0.124681	1.00093	0.884417	1.13279	24.0902	TRUE	2.03408e-56	Atopic_Dermatitis	Validation (Nikpay Trans)
miR-148a-3p	Wald ratio	1	0.0453454	0.020011	0.02345	0.00612382	0.084567	1.04639	1.00614	1.08825	22.0793	TRUE	8.96241e-06	Atopic_Dermatitis	Validation (FHS Cis)
miR-125a-5p	Inverse variance weighted	3	-0.0468736	0.0200386	0.0193268	-0.0861491	-0.00759797	0.954208	0.917457	0.992431	47.416	TRUE	8.47127e-30	Atopic_Dermatitis	Validation (FHS Cis)
miR-99b-5p	Inverse variance weighted	4	-0.0332191	0.0483875	0.492384	-0.128059	0.0616203	0.967327	0.879802	1.06356	32.8701	TRUE	2.0165e-26	Atopic_Dermatitis	Validation (FHS Cis)
miR-941	Inverse variance weighted	4	-0.00815486	0.024877	0.743057	-0.0569137	0.040604	0.991878	0.944676	1.04144	58.5593	TRUE	2.44416e-48	Atopic_Dermatitis	Validation (FHS Cis)

## Sheet: Table S3
Table S3. Reverse causal inference between Atopic Dermatitis and causal miRNAs.
outcome	exposure	method	nsnp	b	se	pval
miR-33a-5p	Atopic_Dermatitis	Inverse variance weighted	22	0.0449105	0.0367603	0.221816
miR-33a-5p	Atopic_Dermatitis	Weighted median	22	0.0497665	0.0553455	0.368548
miR-33a-5p	Atopic_Dermatitis	MR Egger	22	-0.0159214	0.105223	0.881246
miR-941	Atopic_Dermatitis	Inverse variance weighted	22	0.0968401	0.0899285	0.281544
miR-941	Atopic_Dermatitis	Weighted median	22	0.0360822	0.113173	0.749861
miR-941	Atopic_Dermatitis	MR Egger	22	0.0818111	0.264357	0.760163
miR-146a-5p	Atopic_Dermatitis	Inverse variance weighted	22	0.0292385	0.037813	0.439381
miR-146a-5p	Atopic_Dermatitis	Weighted median	22	0.0215289	0.0547046	0.693914
miR-146a-5p	Atopic_Dermatitis	MR Egger	22	-0.137743	0.103492	0.198178
miR-1908-5p	Atopic_Dermatitis	Inverse variance weighted	22	-0.0206674	0.0498171	0.678241
miR-1908-5p	Atopic_Dermatitis	Weighted median	22	0.0113638	0.0634416	0.857842
miR-1908-5p	Atopic_Dermatitis	MR Egger	22	0.113042	0.142782	0.437819
miR-146a-3p	Atopic_Dermatitis	Inverse variance weighted	22	-0.0783656	0.068047	0.249469
miR-146a-3p	Atopic_Dermatitis	Weighted median	22	-0.117135	0.0945278	0.215286
miR-146a-3p	Atopic_Dermatitis	MR Egger	22	-0.08032	0.199573	0.691615
miR-4433b-5p	Atopic_Dermatitis	Inverse variance weighted	22	-0.0663485	0.0679101	0.328567
miR-4433b-5p	Atopic_Dermatitis	Weighted median	22	-0.0873018	0.0968793	0.367514
miR-4433b-5p	Atopic_Dermatitis	MR Egger	22	0.0254943	0.194185	0.896859
miR-181b-5p	Atopic_Dermatitis	Inverse variance weighted	22	-0.0434114	0.0484415	0.370166
miR-181b-5p	Atopic_Dermatitis	Weighted median	22	-0.0928962	0.0701648	0.185513
miR-181b-5p	Atopic_Dermatitis	MR Egger	22	-0.287258	0.138481	0.0511705
let-7a-5p	Atopic_Dermatitis	Inverse variance weighted	22	0.000421038	0.0180932	0.981434
let-7a-5p	Atopic_Dermatitis	Weighted median	22	-0.00489558	0.0236704	0.836148
let-7a-5p	Atopic_Dermatitis	MR Egger	22	-0.000427368	0.0530214	0.993649
miR-148a-3p	Atopic_Dermatitis	Inverse variance weighted	22	0.0263153	0.0474886	0.579483
miR-148a-3p	Atopic_Dermatitis	Weighted median	22	0.00304912	0.0671118	0.963762
miR-148a-3p	Atopic_Dermatitis	MR Egger	22	0.159336	0.135918	0.254852
miR-99b-5p	Atopic_Dermatitis	Inverse variance weighted	22	0.0420013	0.0432641	0.331642
miR-99b-5p	Atopic_Dermatitis	Weighted median	22	-0.0283574	0.0601937	0.637568
miR-99b-5p	Atopic_Dermatitis	MR Egger	22	0.00291854	0.123943	0.981447
let-7e-5p	Atopic_Dermatitis	Inverse variance weighted	22	0.0131811	0.0431354	0.759927
let-7e-5p	Atopic_Dermatitis	Weighted median	22	-0.0154964	0.0629368	0.805511
let-7e-5p	Atopic_Dermatitis	MR Egger	22	-0.0562347	0.123539	0.653869
miR-136-5p	Atopic_Dermatitis	Inverse variance weighted	22	-0.0762493	0.0544602	0.161485
miR-136-5p	Atopic_Dermatitis	Weighted median	22	-0.0774128	0.067635	0.252388
miR-136-5p	Atopic_Dermatitis	MR Egger	22	-0.148076	0.158877	0.362443
miR-6891-3p	Atopic_Dermatitis	Inverse variance weighted	22	-0.0749374	0.0709105	0.290608
miR-6891-3p	Atopic_Dermatitis	Weighted median	22	-0.122334	0.109994	0.26606
miR-6891-3p	Atopic_Dermatitis	MR Egger	22	0.0911621	0.203183	0.658493
miR-133a-3p	Atopic_Dermatitis	Inverse variance weighted	22	-0.0669383	0.112829	0.552998
miR-133a-3p	Atopic_Dermatitis	Weighted median	22	0.00131881	0.160291	0.993435
miR-133a-3p	Atopic_Dermatitis	MR Egger	22	-0.512222	0.312838	0.117198
miR-125a-5p	Atopic_Dermatitis	Inverse variance weighted	22	-0.033313	0.0472092	0.480408
miR-125a-5p	Atopic_Dermatitis	Weighted median	22	0.0294303	0.0662646	0.656946
miR-125a-5p	Atopic_Dermatitis	MR Egger	22	-0.245473	0.135141	0.0843251

## Sheet: Table S4
Table S4. Colocalization analysis results of causal miRNAs and Atopic Dermatitis.
Phenotype	miRNA	nsnps	PP.H3	PP.H4	Region_SNP	Region_Chr	Region_Pos
Atopic_Dermatitis	miR-33a-5p	671	0.0177935	0.0438178	rs2413660	22	41851356
Atopic_Dermatitis	miR-941	528	0.999992	3.55779e-07	rs2427550	20	63916222
Atopic_Dermatitis	miR-146a-5p	617	0.0187272	0.148165	rs2910211	5	160449881
Atopic_Dermatitis	miR-1908-5p	439	0.0079998	0.990131	rs174561	11	61815236
Atopic_Dermatitis	miR-146a-3p	628	0.0136842	0.102618	rs61665417	5	160491328
Atopic_Dermatitis	miR-4433b-5p	563	0.0101445	0.0692213	rs2059631	2	64347548
Atopic_Dermatitis	miR-181b-5p	495	0.0485737	0.00674778	rs12125200	1	199022914
Atopic_Dermatitis	let-7a-5p	595	0.0123034	0.110161	rs10512230	9	94153948
Atopic_Dermatitis	miR-148a-3p	619	0.0636719	0.0500466	rs9639523	7	25952357
Atopic_Dermatitis	miR-99b-5p	830	0.0186451	0.6189	rs11084100	19	51657590
Atopic_Dermatitis	let-7e-5p	830	0.0150539	0.698271	rs11084100	19	51657590
Atopic_Dermatitis	miR-136-5p	498	0.00896662	0.045627	rs12434496	14	100712885
Atopic_Dermatitis	miR-6891-3p	994	0.996678	0.000725562	rs2596477	6	31359946
Atopic_Dermatitis	miR-133a-3p	479	0.0219854	0.150993	rs12624608	20	62558091
Atopic_Dermatitis	miR-125a-5p	882	0.0103436	0.788341	rs11673260	19	51678545

## Sheet: Table S5
Table S5. Target identification of causal miRNAs
database	mature_mirna_acc	mature_mirna_id	target_symbol	target_entrez	target_ensembl	experiment
mirecords	MIMAT0000066	hsa-let-7e-5p	SMC1A	8243	ENSG00000072501	activity assay
mirecords	MIMAT0000066	hsa-let-7e-5p	SMC1A	8243	ENSG00000072501	activity assay
mirecords	MIMAT0000066	hsa-let-7e-5p	HMGA2	8091	ENSG00000149948	Western blot//quantitative RT-PCR//Luciferase-qRT-PCR
mirecords	MIMAT0000066	hsa-let-7e-5p	HMGA2	8091	ENSG00000149948	Western blot//quantitative RT-PCR//Luciferase-qRT-PCR
mirecords	MIMAT0000066	hsa-let-7e-5p	HMGA2	8091	ENSG00000149948	Western blot//quantitative RT-PCR//Luciferase-qRT-PCR
mirecords	MIMAT0000066	hsa-let-7e-5p	HMGA2	8091	ENSG00000149948	Western blot//quantitative RT-PCR//Luciferase-qRT-PCR
mirecords	MIMAT0000066	hsa-let-7e-5p	HMGA2	8091	ENSG00000149948	Western blot//quantitative RT-PCR//Luciferase-qRT-PCR
mirecords	MIMAT0000066	hsa-let-7e-5p	HMGA2	8091	ENSG00000149948	Western blot//quantitative RT-PCR
mirecords	MIMAT0000066	hsa-let-7e-5p	DAD1	1603	ENSG00000129562
mirecords	MIMAT0000066	hsa-let-7e-5p	RABGAP1L	9910	ENSG00000152061
mirecords	MIMAT0000066	hsa-let-7e-5p	WNT1	7471	ENSG00000125084
mirecords	MIMAT0000257	hsa-miR-181b-5p	TCL1A	8115	ENSG00000100721	Western blot
mirecords	MIMAT0000257	hsa-miR-181b-5p	VSNL1	7447	ENSG00000163032
mirecords	MIMAT0000257	hsa-miR-181b-5p	GRIA2	2891	ENSG00000120251
mirecords	MIMAT0000257	hsa-miR-181b-5p	TAF6L	10629	ENSG00000162227
mirecords	MIMAT0000257	hsa-miR-181b-5p	PLAG1	5324	ENSG00000181690
mirecords	MIMAT0000257	hsa-miR-181b-5p	ESR1	2099	ENSG00000091831	Luciferase activity assay
mirecords	MIMAT0000257	hsa-miR-181b-5p	ESR1	2099	ENSG00000091831	Luciferase activity assay
mirecords	MIMAT0000257	hsa-miR-181b-5p	ESR1	2099	ENSG00000091831	Luciferase activity assay
mirecords	MIMAT0000257	hsa-miR-181b-5p	CDX2	1045	ENSG00000165556	Western blot//Luciferase activity assay
mirecords	MIMAT0000257	hsa-miR-181b-5p	GATA6	2627	ENSG00000141448	Western blot//Luciferase activity assay
mirecords	MIMAT0000257	hsa-miR-181b-5p	NLK	51701	ENSG00000087095	Western blot//Luciferase activity assay
mirecords	MIMAT0000257	hsa-miR-181b-5p	TIMP3	7078	ENSG00000100234	Western blot//Luciferase activity assay
mirecords	MIMAT0000257	hsa-miR-181b-5p	TIMP3	7078	ENSG00000100234	Western blot//Luciferase activity assay
mirecords	MIMAT0000243	hsa-miR-148a-3p	DNMT3B	1789	ENSG00000088305	Western blot//GFP-Western blot
mirecords	MIMAT0000243	hsa-miR-148a-3p	DNMT3B	1789	ENSG00000088305	Western blot//GFP-Western blot
mirecords	MIMAT0000243	hsa-miR-148a-3p	DNMT3B	1789	ENSG00000088305
mirecords	MIMAT0000243	hsa-miR-148a-3p	DNMT3B	1789	ENSG00000088305
mirecords	MIMAT0000243	hsa-miR-148a-3p	NR1I2	8856	ENSG00000144852	Western blot//activity assay
mirecords	MIMAT0000243	hsa-miR-148a-3p	DNMT1	1786	ENSG00000130816	Western blot//Luciferase activity assay
mirecords	MIMAT0000243	hsa-miR-148a-3p	DNMT1	1786	ENSG00000130816	Western blot//Luciferase activity assay
mirecords	MIMAT0000243	hsa-miR-148a-3p	MSK1			Western blot
mirecords	MIMAT0000243	hsa-miR-148a-3p	CDNK1B			Western blot//Luciferase activity assay
mirecords	MIMAT0000427	hsa-miR-133a-3p	KCNQ1	3784	ENSG00000053918	Western blot
mirecords	MIMAT0000427	hsa-miR-133a-3p	KCNQ1	3784	ENSG00000053918	Western blot
mirecords	MIMAT0000427	hsa-miR-133a-3p	KCNQ1	3784	ENSG00000053918	Western blot
mirecords	MIMAT0000427	hsa-miR-133a-3p	KCNQ1	3784	ENSG00000053918	Western blot
mirecords	MIMAT0000427	hsa-miR-133a-3p	KCNQ1	3784	ENSG00000053918	Western blot
mirecords	MIMAT0000427	hsa-miR-133a-3p	KCNQ1	3784	ENSG00000053918	Western blot
mirecords	MIMAT0000427	hsa-miR-133a-3p	KCNQ1	3784	ENSG00000053918	Western blot
mirecords	MIMAT0000427	hsa-miR-133a-3p	KCNQ1	3784	ENSG00000053918	Western blot
mirecords	MIMAT0000427	hsa-miR-133a-3p	CASP9	842	ENSG00000132906	activity assay
mirecords	MIMAT0000427	hsa-miR-133a-3p	CASP9	842	ENSG00000132906	activity assay
mirecords	MIMAT0000427	hsa-miR-133a-3p	CASP9	842	ENSG00000132906	activity assay
mirecords	MIMAT0000427	hsa-miR-133a-3p	CASP9	842	ENSG00000132906	activity assay
mirecords	MIMAT0000427	hsa-miR-133a-3p	CASP9	842	ENSG00000132906	activity assay
mirecords	MIMAT0000427	hsa-miR-133a-3p	KCNH2	3757	ENSG00000055118	Western blot//activity assay
mirecords	MIMAT0000427	hsa-miR-133a-3p	KCNH2	3757	ENSG00000055118	Western blot//activity assay
mirecords	MIMAT0000427	hsa-miR-133a-3p	KCNH2	3757	ENSG00000055118	Western blot//activity assay
mirecords	MIMAT0000427	hsa-miR-133a-3p	KCNH2	3757	ENSG00000055118	Western blot//activity assay
mirecords	MIMAT0000427	hsa-miR-133a-3p	KCNH2	3757	ENSG00000055118	Western blot//activity assay
mirecords	MIMAT0000427	hsa-miR-133a-3p	KCNH2	3757	ENSG00000055118	Western blot//activity assay
mirecords	MIMAT0000427	hsa-miR-133a-3p	KCNH2	3757	ENSG00000055118	Western blot//activity assay
mirecords	MIMAT0000427	hsa-miR-133a-3p	KCNH2	3757	ENSG00000055118	Western blot//activity assay
mirecords	MIMAT0000427	hsa-miR-133a-3p	KCNH2	3757	ENSG00000055118	Western blot//activity assay
mirecords	MIMAT0000427	hsa-miR-133a-3p	KCNH2	3757	ENSG00000055118	Western blot//activity assay
mirecords	MIMAT0000427	hsa-miR-133a-3p	KCNH2	3757	ENSG00000055118	Western blot//activity assay
mirecords	MIMAT0000427	hsa-miR-133a-3p	KCNH2	3757	ENSG00000055118	Western blot//activity assay
mirecords	MIMAT0000427	hsa-miR-133a-3p	HCN2	610	ENSG00000099822	Western blot//activity assay//Luciferase activity assay
mirecords	MIMAT0000427	hsa-miR-133a-3p	PKM2		ENSG00000067225	Western blot
mirecords	MIMAT0000427	hsa-miR-133a-3p	FSCN1	6624	ENSG00000075618	phenotypic sensor assay//activity assay
mirecords	MIMAT0000427	hsa-miR-133a-3p	KLF15	28999	ENSG00000163884	Western blot
mirecords	MIMAT0000427	hsa-miR-133a-3p	RHOA	387	ENSG00000067560	Western blot
mirecords	MIMAT0000427	hsa-miR-133a-3p	KRT7	3855	ENSG00000135480	Western blot
mirtarbase	MIMAT0000066	hsa-let-7e-5p	MYCN	4613	ENSG00000134323	Reporter assay//Luciferase reporter assay//Microarray//qRT-PCR//Western blot
mirtarbase	MIMAT0000066	hsa-let-7e-5p	MYCN	4613	ENSG00000134323	Reporter assay//Luciferase reporter assay//Microarray//qRT-PCR//Western blot
mirtarbase	MIMAT0000066	hsa-let-7e-5p	MYCN	4613	ENSG00000134323	Reporter assay
mirtarbase	MIMAT0000066	hsa-let-7e-5p	MYCN	4613	ENSG00000134323	Luciferase reporter assay//Microarray//qRT-PCR//Western blot
mirtarbase	MIMAT0000066	hsa-let-7e-5p	SMC1A	8243	ENSG00000072501	Luciferase reporter assay//Other//Reporter assay;Other//PAR-CLIP
mirtarbase	MIMAT0000066	hsa-let-7e-5p	SMC1A	8243	ENSG00000072501	Luciferase reporter assay//Other//Reporter assay;Other//PAR-CLIP
mirtarbase	MIMAT0000066	hsa-let-7e-5p	SMC1A	8243	ENSG00000072501	Luciferase reporter assay//Other//Reporter assay;Other//PAR-CLIP
mirtarbase	MIMAT0000066	hsa-let-7e-5p	SMC1A	8243	ENSG00000072501	Luciferase reporter assay//Other//Reporter assay;Other//PAR-CLIP
mirtarbase	MIMAT0000066	hsa-let-7e-5p	SMC1A	8243	ENSG00000072501	Luciferase reporter assay//Other//Reporter assay;Other//PAR-CLIP
mirtarbase	MIMAT0000066	hsa-let-7e-5p	SMC1A	8243	ENSG00000072501	Luciferase reporter assay//Reporter assay;Other
mirtarbase	MIMAT0000066	hsa-let-7e-5p	SMC1A	8243	ENSG00000072501	PAR-CLIP
mirtarbase	MIMAT0000066	hsa-let-7e-5p	SMC1A	8243	ENSG00000072501	PAR-CLIP
mirtarbase	MIMAT0000066	hsa-let-7e-5p	SMC1A	8243	ENSG00000072501	PAR-CLIP
mirtarbase	MIMAT0000066	hsa-let-7e-5p	SMC1A	8243	ENSG00000072501	PAR-CLIP
mirtarbase	MIMAT0000066	hsa-let-7e-5p	NCOA3	8202	ENSG00000124151	PAR-CLIP
mirtarbase	MIMAT0000066	hsa-let-7e-5p	NCOA3	8202	ENSG00000124151	PAR-CLIP
mirtarbase	MIMAT0000066	hsa-let-7e-5p	NCOA3	8202	ENSG00000124151	PAR-CLIP
mirtarbase	MIMAT0000066	hsa-let-7e-5p	NCOA3	8202	ENSG00000124151	PAR-CLIP
mirtarbase	MIMAT0000066	hsa-let-7e-5p	THBS1	7057	ENSG00000137801	PAR-CLIP
mirtarbase	MIMAT0000066	hsa-let-7e-5p	THBS1	7057	ENSG00000137801	PAR-CLIP
mirtarbase	MIMAT0000066	hsa-let-7e-5p	THBS1	7057	ENSG00000137801	PAR-CLIP
mirtarbase	MIMAT0000066	hsa-let-7e-5p	TIMP3	7078	ENSG00000100234	CLASH
mirtarbase	MIMAT0000066	hsa-let-7e-5p	TIMP3	7078	ENSG00000100234	CLASH
mirtarbase	MIMAT0000066	hsa-let-7e-5p	RABGAP1L	9910	ENSG00000152061	Other
mirtarbase	MIMAT0000066	hsa-let-7e-5p	ARCN1	372	ENSG00000095139	CLASH
mirtarbase	MIMAT0000066	hsa-let-7e-5p	ARCN1	372	ENSG00000095139	CLASH
mirtarbase	MIMAT0000066	hsa-let-7e-5p	RABL2B	11158	ENSG00000079974	PAR-CLIP
mirtarbase	MIMAT0000066	hsa-let-7e-5p	RABL2B	11158	ENSG00000079974	PAR-CLIP
mirtarbase	MIMAT0000066	hsa-let-7e-5p	RABL2B	11158	ENSG00000079974	PAR-CLIP
mirtarbase	MIMAT0000066	hsa-let-7e-5p	RABL2B	11158	ENSG00000079974	PAR-CLIP
mirtarbase	MIMAT0000066	hsa-let-7e-5p	DHX15	1665	ENSG00000109606	CLASH
mirtarbase	MIMAT0000066	hsa-let-7e-5p	DHX15	1665	ENSG00000109606	CLASH
mirtarbase	MIMAT0000066	hsa-let-7e-5p	ZNF264	9422	ENSG00000083844	PAR-CLIP
mirtarbase	MIMAT0000066	hsa-let-7e-5p	ZNF264	9422	ENSG00000083844	PAR-CLIP
mirtarbase	MIMAT0000066	hsa-let-7e-5p	PARP16	54956	ENSG00000138617	PAR-CLIP
mirtarbase	MIMAT0000066	hsa-let-7e-5p	PARP16	54956	ENSG00000138617	PAR-CLIP
mirtarbase	MIMAT0000066	hsa-let-7e-5p	E2F6	1876	ENSG00000169016	PAR-CLIP
mirtarbase	MIMAT0000066	hsa-let-7e-5p	E2F6	1876	ENSG00000169016	PAR-CLIP
mirtarbase	MIMAT0000066	hsa-let-7e-5p	PTK2	5747	ENSG00000169398	CLASH
mirtarbase	MIMAT0000066	hsa-let-7e-5p	PTK2	5747	ENSG00000169398	CLASH
mirtarbase	MIMAT0000066	hsa-let-7e-5p	CCND1	595	ENSG00000110092	Luciferase reporter assay//qRT-PCR//Western blot//PAR-CLIP
mirtarbase	MIMAT0000066	hsa-let-7e-5p	CCND1	595	ENSG00000110092	Luciferase reporter assay//qRT-PCR//Western blot//PAR-CLIP
mirtarbase	MIMAT0000066	hsa-let-7e-5p	CCND1	595	ENSG00000110092	Luciferase reporter assay//qRT-PCR//Western blot//PAR-CLIP
mirtarbase	MIMAT0000066	hsa-let-7e-5p	CCND1	595	ENSG00000110092	Luciferase reporter assay//qRT-PCR//Western blot//PAR-CLIP
mirtarbase	MIMAT0000066	hsa-let-7e-5p	CCND1	595	ENSG00000110092	Luciferase reporter assay//qRT-PCR//Western blot
mirtarbase	MIMAT0000066	hsa-let-7e-5p	CCND1	595	ENSG00000110092	qRT-PCR//Western blot
mirtarbase	MIMAT0000066	hsa-let-7e-5p	CCND1	595	ENSG00000110092	PAR-CLIP
mirtarbase	MIMAT0000066	hsa-let-7e-5p	CCND1	595	ENSG00000110092	PAR-CLIP
mirtarbase	MIMAT0000066	hsa-let-7e-5p	CDKN1A	1026	ENSG00000124762	PAR-CLIP
mirtarbase	MIMAT0000066	hsa-let-7e-5p	CDKN1A	1026	ENSG00000124762	PAR-CLIP
mirtarbase	MIMAT0000066	hsa-let-7e-5p	IL6R	3570	ENSG00000160712	PAR-CLIP
mirtarbase	MIMAT0000066	hsa-let-7e-5p	MYC	4609	ENSG00000136997	TRAP
mirtarbase	MIMAT0000066	hsa-let-7e-5p	MYC	4609	ENSG00000136997	TRAP
mirtarbase	MIMAT0000066	hsa-let-7e-5p	BACH1	571	ENSG00000156273	PAR-CLIP
mirtarbase	MIMAT0000066	hsa-let-7e-5p	BACH1	571	ENSG00000156273	PAR-CLIP
mirtarbase	MIMAT0000066	hsa-let-7e-5p	MATR3	9782	ENSG00000015479	CLASH
mirtarbase	MIMAT0000066	hsa-let-7e-5p	MATR3	9782	ENSG00000015479	CLASH
mirtarbase	MIMAT0000066	hsa-let-7e-5p	IGF2BP1	10642	ENSG00000159217	PAR-CLIP
mirtarbase	MIMAT0000066	hsa-let-7e-5p	IGF2BP1	10642	ENSG00000159217	PAR-CLIP
mirtarbase	MIMAT0000066	hsa-let-7e-5p	HMGA2	8091	ENSG00000149948	Luciferase reporter assay//qRT-PCR//Other//PAR-CLIP//HITS-CLIP
mirtarbase	MIMAT0000066	hsa-let-7e-5p	HMGA2	8091	ENSG00000149948	Luciferase reporter assay//qRT-PCR//Other//PAR-CLIP//HITS-CLIP
mirtarbase	MIMAT0000066	hsa-let-7e-5p	HMGA2	8091	ENSG00000149948	Luciferase reporter assay//qRT-PCR//Other//PAR-CLIP//HITS-CLIP
mirtarbase	MIMAT0000066	hsa-let-7e-5p	HMGA2	8091	ENSG00000149948	Luciferase reporter assay//qRT-PCR//Other//PAR-CLIP//HITS-CLIP
mirtarbase	MIMAT0000066	hsa-let-7e-5p	HMGA2	8091	ENSG00000149948	Luciferase reporter assay//qRT-PCR
mirtarbase	MIMAT0000066	hsa-let-7e-5p	HMGA2	8091	ENSG00000149948	PAR-CLIP
mirtarbase	MIMAT0000066	hsa-let-7e-5p	HMGA2	8091	ENSG00000149948	HITS-CLIP
mirtarbase	MIMAT0000066	hsa-let-7e-5p	HMGA2	8091	ENSG00000149948	PAR-CLIP
mirtarbase	MIMAT0000066	hsa-let-7e-5p	CCNG1	900	ENSG00000113328	CLASH
mirtarbase	MIMAT0000066	hsa-let-7e-5p	CCNG1	900	ENSG00000113328	CLASH
mirtarbase	MIMAT0000066	hsa-let-7e-5p	SERBP1	26135	ENSG00000142864	CLASH
mirtarbase	MIMAT0000066	hsa-let-7e-5p	SERBP1	26135	ENSG00000142864	CLASH
mirtarbase	MIMAT0000066	hsa-let-7e-5p	HMGB1	3146	ENSG00000189403	CLASH
mirtarbase	MIMAT0000066	hsa-let-7e-5p	HMGB1	3146	ENSG00000189403	CLASH
mirtarbase	MIMAT0000066	hsa-let-7e-5p	IRS2	8660	ENSG00000185950	CLASH//qrt-pcr
mirtarbase	MIMAT0000066	hsa-let-7e-5p	IRS2	8660	ENSG00000185950	CLASH//qrt-pcr
mirtarbase	MIMAT0000066	hsa-let-7e-5p	IRS2	8660	ENSG00000185950	CLASH
mirtarbase	MIMAT0000066	hsa-let-7e-5p	GTPBP8	29083	ENSG00000163607	CLASH
mirtarbase	MIMAT0000066	hsa-let-7e-5p	GTPBP8	29083	ENSG00000163607	CLASH
mirtarbase	MIMAT0000066	hsa-let-7e-5p	NME4	4833	ENSG00000103202	CLASH
mirtarbase	MIMAT0000066	hsa-let-7e-5p	NME4	4833	ENSG00000103202	CLASH
mirtarbase	MIMAT0000066	hsa-let-7e-5p	AHR	196	ENSG00000106546	PAR-CLIP
mirtarbase	MIMAT0000066	hsa-let-7e-5p	AHR	196	ENSG00000106546	PAR-CLIP
mirtarbase	MIMAT0000066	hsa-let-7e-5p	CD59	966	ENSG00000085063	PAR-CLIP
mirtarbase	MIMAT0000066	hsa-let-7e-5p	CD59	966	ENSG00000085063	PAR-CLIP
mirtarbase	MIMAT0000066	hsa-let-7e-5p	CD59	966	ENSG00000085063	PAR-CLIP
mirtarbase	MIMAT0000066	hsa-let-7e-5p	CD59	966	ENSG00000085063	PAR-CLIP
mirtarbase	MIMAT0000066	hsa-let-7e-5p	STK4	6789	ENSG00000101109	PAR-CLIP
mirtarbase	MIMAT0000066	hsa-let-7e-5p	STK4	6789	ENSG00000101109	PAR-CLIP
mirtarbase	MIMAT0000066	hsa-let-7e-5p	TNFAIP1	7126	ENSG00000109079	CLASH
mirtarbase	MIMAT0000066	hsa-let-7e-5p	TNFAIP1	7126	ENSG00000109079	CLASH
mirtarbase	MIMAT0000066	hsa-let-7e-5p	HERPUD1	9709	ENSG00000051108	PAR-CLIP//HITS-CLIP
mirtarbase	MIMAT0000066	hsa-let-7e-5p	HERPUD1	9709	ENSG00000051108	PAR-CLIP//HITS-CLIP
mirtarbase	MIMAT0000066	hsa-let-7e-5p	HERPUD1	9709	ENSG00000051108	PAR-CLIP
mirtarbase	MIMAT0000066	hsa-let-7e-5p	HERPUD1	9709	ENSG00000051108	HITS-CLIP
mirtarbase	MIMAT0000066	hsa-let-7e-5p	ECHDC1	55862	ENSG00000093144	PAR-CLIP
mirtarbase	MIMAT0000066	hsa-let-7e-5p	ECHDC1	55862	ENSG00000093144	PAR-CLIP
mirtarbase	MIMAT0000066	hsa-let-7e-5p	RBM8A	9939	ENSG00000265241	CLASH
mirtarbase	MIMAT0000066	hsa-let-7e-5p	RBM8A	9939	ENSG00000265241	CLASH
mirtarbase	MIMAT0000066	hsa-let-7e-5p	SOCS1	8651	ENSG00000185338	PAR-CLIP
mirtarbase	MIMAT0000066	hsa-let-7e-5p	SOCS1	8651	ENSG00000185338	PAR-CLIP
mirtarbase	MIMAT0000066	hsa-let-7e-5p	EZH2	2146	ENSG00000106462	qRT-PCR//Western blot
mirtarbase	MIMAT0000066	hsa-let-7e-5p	EZH2	2146	ENSG00000106462	qRT-PCR//Western blot
mirtarbase	MIMAT0000066	hsa-let-7e-5p	FDPS	2224	ENSG00000160752	CLASH
mirtarbase	MIMAT0000066	hsa-let-7e-5p	FDPS	2224	ENSG00000160752	CLASH
mirtarbase	MIMAT0000066	hsa-let-7e-5p	TGFBR3	7049	ENSG00000069702	PAR-CLIP
mirtarbase	MIMAT0000066	hsa-let-7e-5p	TGFBR3	7049	ENSG00000069702	PAR-CLIP
mirtarbase	MIMAT0000066	hsa-let-7e-5p	RUNX1T1	862	ENSG00000079102	CLASH
mirtarbase	MIMAT0000066	hsa-let-7e-5p	RUNX1T1	862	ENSG00000079102	CLASH
mirtarbase	MIMAT0000066	hsa-let-7e-5p	POLR3D	661	ENSG00000168495	CLASH//HITS-CLIP
mirtarbase	MIMAT0000066	hsa-let-7e-5p	POLR3D	661	ENSG00000168495	CLASH//HITS-CLIP
mirtarbase	MIMAT0000066	hsa-let-7e-5p	POLR3D	661	ENSG00000168495	CLASH
mirtarbase	MIMAT0000066	hsa-let-7e-5p	POLR3D	661	ENSG00000168495	HITS-CLIP
mirtarbase	MIMAT0000066	hsa-let-7e-5p	HMGA1	3159	ENSG00000137309	PAR-CLIP//HITS-CLIP
mirtarbase	MIMAT0000066	hsa-let-7e-5p	HMGA1	3159	ENSG00000137309	PAR-CLIP//HITS-CLIP
mirtarbase	MIMAT0000066	hsa-let-7e-5p	HMGA1	3159	ENSG00000137309	PAR-CLIP
mirtarbase	MIMAT0000066	hsa-let-7e-5p	HMGA1	3159	ENSG00000137309	HITS-CLIP
mirtarbase	MIMAT0000066	hsa-let-7e-5p	MMP9	4318	ENSG00000100985	Luciferase reporter assay//qRT-PCR//Western blot
mirtarbase	MIMAT0000066	hsa-let-7e-5p	MMP9	4318	ENSG00000100985	Luciferase reporter assay//qRT-PCR//Western blot
mirtarbase	MIMAT0000066	hsa-let-7e-5p	AURKB	9212	ENSG00000178999	Luciferase reporter assay//Microarray//qRT-PCR//Western blot
mirtarbase	MIMAT0000066	hsa-let-7e-5p	AURKB	9212	ENSG00000178999	Luciferase reporter assay//Microarray//qRT-PCR//Western blot
mirtarbase	MIMAT0000066	hsa-let-7e-5p	PPP2R2A	5520	ENSG00000221914	PAR-CLIP
mirtarbase	MIMAT0000066	hsa-let-7e-5p	PPP2R2A	5520	ENSG00000221914	PAR-CLIP
mirtarbase	MIMAT0000066	hsa-let-7e-5p	YWHAZ	7534	ENSG00000164924	PAR-CLIP
mirtarbase	MIMAT0000066	hsa-let-7e-5p	YWHAZ	7534	ENSG00000164924	PAR-CLIP
mirtarbase	MIMAT0000066	hsa-let-7e-5p	AGO1	26523	ENSG00000092847	CLASH//Immunohistochemistry//Immunoprecipitaion//Luciferase reporter assay//Northern blot//qRT-PCR//Western blot
mirtarbase	MIMAT0000066	hsa-let-7e-5p	AGO1	26523	ENSG00000092847	CLASH//Immunohistochemistry//Immunoprecipitaion//Luciferase reporter assay//Northern blot//qRT-PCR//Western blot
mirtarbase	MIMAT0000066	hsa-let-7e-5p	AGO1	26523	ENSG00000092847	Immunohistochemistry//Immunoprecipitaion//Luciferase reporter assay//Northern blot//qRT-PCR//Western blot
mirtarbase	MIMAT0000066	hsa-let-7e-5p	AGO1	26523	ENSG00000092847	CLASH
mirtarbase	MIMAT0000066	hsa-let-7e-5p	AGO2	27161	ENSG00000123908	CLASH
mirtarbase	MIMAT0000066	hsa-let-7e-5p	AGO2	27161	ENSG00000123908	CLASH
mirtarbase	MIMAT0000066	hsa-let-7e-5p	PA2G4	5036	ENSG00000170515	CLASH
mirtarbase	MIMAT0000066	hsa-let-7e-5p	PA2G4	5036	ENSG00000170515	CLASH
mirtarbase	MIMAT0000066	hsa-let-7e-5p	ARID3B	10620	ENSG00000179361	PAR-CLIP
mirtarbase	MIMAT0000066	hsa-let-7e-5p	ARID3B	10620	ENSG00000179361	PAR-CLIP
mirtarbase	MIMAT0000066	hsa-let-7e-5p	ARID3B	10620	ENSG00000179361	PAR-CLIP
mirtarbase	MIMAT0000066	hsa-let-7e-5p	ARID3B	10620	ENSG00000179361	PAR-CLIP
mirtarbase	MIMAT0000066	hsa-let-7e-5p	ARID3B	10620	ENSG00000179361	PAR-CLIP
mirtarbase	MIMAT0000066	hsa-let-7e-5p	ARID3B	10620	ENSG00000179361	PAR-CLIP
mirtarbase	MIMAT0000066	hsa-let-7e-5p	BMP2K	55589	ENSG00000138756	CLASH
mirtarbase	MIMAT0000066	hsa-let-7e-5p	BMP2K	55589	ENSG00000138756	CLASH
mirtarbase	MIMAT0000066	hsa-let-7e-5p	DAD1	1603	ENSG00000129562	Other
mirtarbase	MIMAT0000066	hsa-let-7e-5p	EIF4G2	1982	ENSG00000110321	PAR-CLIP
mirtarbase	MIMAT0000066	hsa-let-7e-5p	EIF4G2	1982	ENSG00000110321	PAR-CLIP
mirtarbase	MIMAT0000066	hsa-let-7e-5p	EIF4G2	1982	ENSG00000110321	PAR-CLIP
mirtarbase	MIMAT0000066	hsa-let-7e-5p	EIF4G2	1982	ENSG00000110321	PAR-CLIP
mirtarbase	MIMAT0000066	hsa-let-7e-5p	EIF4G2	1982	ENSG00000110321	PAR-CLIP
mirtarbase	MIMAT0000066	hsa-let-7e-5p	EIF4G2	1982	ENSG00000110321	PAR-CLIP
mirtarbase	MIMAT0000066	hsa-let-7e-5p	BTRC	8945	ENSG00000166167	CLASH
mirtarbase	MIMAT0000066	hsa-let-7e-5p	BTRC	8945	ENSG00000166167	CLASH
mirtarbase	MIMAT0000066	hsa-let-7e-5p	PLK1	5347	ENSG00000166851	Microarray//qRT-PCR//Western blot
mirtarbase	MIMAT0000066	hsa-let-7e-5p	RDX	5962	ENSG00000137710	CLASH//PAR-CLIP
mirtarbase	MIMAT0000066	hsa-let-7e-5p	RDX	5962	ENSG00000137710	CLASH//PAR-CLIP
mirtarbase	MIMAT0000066	hsa-let-7e-5p	RDX	5962	ENSG00000137710	CLASH//PAR-CLIP
mirtarbase	MIMAT0000066	hsa-let-7e-5p	RDX	5962	ENSG00000137710	CLASH//PAR-CLIP
mirtarbase	MIMAT0000066	hsa-let-7e-5p	RDX	5962	ENSG00000137710	CLASH
mirtarbase	MIMAT0000066	hsa-let-7e-5p	RDX	5962	ENSG00000137710	PAR-CLIP
mirtarbase	MIMAT0000066	hsa-let-7e-5p	RDX	5962	ENSG00000137710	PAR-CLIP
mirtarbase	MIMAT0000066	hsa-let-7e-5p	RDX	5962	ENSG00000137710	PAR-CLIP
mirtarbase	MIMAT0000066	hsa-let-7e-5p	WNT1	7471	ENSG00000125084	Flow//Immunoblot//Luciferase reporter assay//Microarray//qRT-PCR//Other
mirtarbase	MIMAT0000066	hsa-let-7e-5p	WNT1	7471	ENSG00000125084	Flow//Immunoblot//Luciferase reporter assay//Microarray//qRT-PCR
mirtarbase	MIMAT0000066	hsa-let-7e-5p	LEFTY1	10637	ENSG00000243709	PAR-CLIP
mirtarbase	MIMAT0000066	hsa-let-7e-5p	LEFTY1	10637	ENSG00000243709	PAR-CLIP
mirtarbase	MIMAT0000066	hsa-let-7e-5p	STAT3	6774	ENSG00000168610	CLASH
mirtarbase	MIMAT0000066	hsa-let-7e-5p	STAT3	6774	ENSG00000168610	CLASH
mirtarbase	MIMAT0000066	hsa-let-7e-5p	ACTA1	58	ENSG00000143632	PAR-CLIP
mirtarbase	MIMAT0000066	hsa-let-7e-5p	ACTA1	58	ENSG00000143632	PAR-CLIP
mirtarbase	MIMAT0000066	hsa-let-7e-5p	ADH5	128	ENSG00000197894	HITS-CLIP
mirtarbase	MIMAT0000066	hsa-let-7e-5p	ADH5	128	ENSG00000197894	HITS-CLIP
mirtarbase	MIMAT0000066	hsa-let-7e-5p	ADH5	128	ENSG00000197894	HITS-CLIP
mirtarbase	MIMAT0000066	hsa-let-7e-5p	ADH5	128	ENSG00000197894	HITS-CLIP
mirtarbase	MIMAT0000066	hsa-let-7e-5p	ADH5	128	ENSG00000197894	PAR-CLIP
mirtarbase	MIMAT0000066	hsa-let-7e-5p	ADH5	128	ENSG00000197894	PAR-CLIP
mirtarbase	MIMAT0000066	hsa-let-7e-5p	AK4	205	ENSG00000162433	PAR-CLIP
mirtarbase	MIMAT0000066	hsa-let-7e-5p	AK4	205	ENSG00000162433	PAR-CLIP
mirtarbase	MIMAT0000066	hsa-let-7e-5p	AK4	205	ENSG00000162433	PAR-CLIP
mirtarbase	MIMAT0000066	hsa-let-7e-5p	AK4	205	ENSG00000162433	PAR-CLIP
mirtarbase	MIMAT0000066	hsa-let-7e-5p	AMD1	262	ENSG00000123505	HITS-CLIP
mirtarbase	MIMAT0000066	hsa-let-7e-5p	AMD1	262	ENSG00000123505	HITS-CLIP
mirtarbase	MIMAT0000066	hsa-let-7e-5p	XIAP	331	ENSG00000101966	CLASH
mirtarbase	MIMAT0000066	hsa-let-7e-5p	XIAP	331	ENSG00000101966	CLASH
mirtarbase	MIMAT0000066	hsa-let-7e-5p	FASLG	356	ENSG00000117560	Luciferase reporter assay//westernblotting//qrt-pcr
mirtarbase	MIMAT0000066	hsa-let-7e-5p	FASLG	356	ENSG00000117560	Luciferase reporter assay//westernblotting//qrt-pcr
mirtarbase	MIMAT0000066	hsa-let-7e-5p	FASLG	356	ENSG00000117560	Luciferase reporter assay
mirtarbase	MIMAT0000066	hsa-let-7e-5p	CALU	813	ENSG00000128595	PAR-CLIP
mirtarbase	MIMAT0000066	hsa-let-7e-5p	CALU	813	ENSG00000128595	PAR-CLIP
mirtarbase	MIMAT0000066	hsa-let-7e-5p	CCNT2	905	ENSG00000082258	PAR-CLIP
mirtarbase	MIMAT0000066	hsa-let-7e-5p	CCNT2	905	ENSG00000082258	PAR-CLIP
mirtarbase	MIMAT0000066	hsa-let-7e-5p	CDC5L	988	ENSG00000096401	CLASH
mirtarbase	MIMAT0000066	hsa-let-7e-5p	CDC5L	988	ENSG00000096401	CLASH
mirtarbase	MIMAT0000066	hsa-let-7e-5p	AP1S1	1174	ENSG00000106367	PAR-CLIP
mirtarbase	MIMAT0000066	hsa-let-7e-5p	AP1S1	1174	ENSG00000106367	PAR-CLIP
mirtarbase	MIMAT0000066	hsa-let-7e-5p	AP1S1	1174	ENSG00000106367	PAR-CLIP
mirtarbase	MIMAT0000066	hsa-let-7e-5p	AP1S1	1174	ENSG00000106367	PAR-CLIP
mirtarbase	MIMAT0000066	hsa-let-7e-5p	CLTC	1213	ENSG00000141367	CLASH
mirtarbase	MIMAT0000066	hsa-let-7e-5p	CLTC	1213	ENSG00000141367	CLASH
mirtarbase	MIMAT0000066	hsa-let-7e-5p	COL6A1	1291	ENSG00000142156	CLASH
mirtarbase	MIMAT0000066	hsa-let-7e-5p	COL6A1	1291	ENSG00000142156	CLASH
mirtarbase	MIMAT0000066	hsa-let-7e-5p	COX10	1352	ENSG00000006695	CLASH
mirtarbase	MIMAT0000066	hsa-let-7e-5p	COX10	1352	ENSG00000006695	CLASH
mirtarbase	MIMAT0000066	hsa-let-7e-5p	CLDN4	1364	ENSG00000189143	CLASH
mirtarbase	MIMAT0000066	hsa-let-7e-5p	CLDN4	1364	ENSG00000189143	CLASH
mirtarbase	MIMAT0000066	hsa-let-7e-5p	CREBBP	1387	ENSG00000005339	CLASH
mirtarbase	MIMAT0000066	hsa-let-7e-5p	CREBBP	1387	ENSG00000005339	CLASH
mirtarbase	MIMAT0000066	hsa-let-7e-5p	CRK	1398	ENSG00000167193	CLASH
mirtarbase	MIMAT0000066	hsa-let-7e-5p	CRK	1398	ENSG00000167193	CLASH
mirtarbase	MIMAT0000066	hsa-let-7e-5p	CRY2	1408	ENSG00000121671	PAR-CLIP
mirtarbase	MIMAT0000066	hsa-let-7e-5p	CRY2	1408	ENSG00000121671	PAR-CLIP
mirtarbase	MIMAT0000066	hsa-let-7e-5p	CRY2	1408	ENSG00000121671	PAR-CLIP
mirtarbase	MIMAT0000066	hsa-let-7e-5p	CRY2	1408	ENSG00000121671	PAR-CLIP
mirtarbase	MIMAT0000066	hsa-let-7e-5p	CTPS1	1503	ENSG00000171793	HITS-CLIP
mirtarbase	MIMAT0000066	hsa-let-7e-5p	CTPS1	1503	ENSG00000171793	HITS-CLIP
mirtarbase	MIMAT0000066	hsa-let-7e-5p	DIAPH1	1729	ENSG00000131504	CLASH
mirtarbase	MIMAT0000066	hsa-let-7e-5p	DIAPH1	1729	ENSG00000131504	CLASH
mirtarbase	MIMAT0000066	hsa-let-7e-5p	ARID3A	1820	ENSG00000116017	PAR-CLIP
mirtarbase	MIMAT0000066	hsa-let-7e-5p	ARID3A	1820	ENSG00000116017	PAR-CLIP
mirtarbase	MIMAT0000066	hsa-let-7e-5p	ARID3A	1820	ENSG00000116017	Luciferase reporter assay//qRT-PCR//Western blot
mirtarbase	MIMAT0000066	hsa-let-7e-5p	ARID3A	1820	ENSG00000116017	PAR-CLIP
mirtarbase	MIMAT0000066	hsa-let-7e-5p	DSP	1832	ENSG00000096696	CLASH
mirtarbase	MIMAT0000066	hsa-let-7e-5p	DSP	1832	ENSG00000096696	CLASH
mirtarbase	MIMAT0000066	hsa-let-7e-5p	DTNB	1838	ENSG00000138101	CLASH
mirtarbase	MIMAT0000066	hsa-let-7e-5p	DTNB	1838	ENSG00000138101	CLASH
mirtarbase	MIMAT0000066	hsa-let-7e-5p	DUSP1	1843	ENSG00000120129	PAR-CLIP
mirtarbase	MIMAT0000066	hsa-let-7e-5p	DUSP1	1843	ENSG00000120129	PAR-CLIP
mirtarbase	MIMAT0000066	hsa-let-7e-5p	DVL3	1857	ENSG00000161202	PAR-CLIP
mirtarbase	MIMAT0000066	hsa-let-7e-5p	DVL3	1857	ENSG00000161202	PAR-CLIP
mirtarbase	MIMAT0000066	hsa-let-7e-5p	EDN1	1906	ENSG00000078401	PAR-CLIP
mirtarbase	MIMAT0000066	hsa-let-7e-5p	EDN1	1906	ENSG00000078401	PAR-CLIP
mirtarbase	MIMAT0000066	hsa-let-7e-5p	EIF4A1	1973	ENSG00000161960	CLASH
mirtarbase	MIMAT0000066	hsa-let-7e-5p	EIF4A1	1973	ENSG00000161960	CLASH
mirtarbase	MIMAT0000066	hsa-let-7e-5p	EIF4EBP2	1979	ENSG00000148730	CLASH
mirtarbase	MIMAT0000066	hsa-let-7e-5p	EIF4EBP2	1979	ENSG00000148730	CLASH
mirtarbase	MIMAT0000066	hsa-let-7e-5p	EN2	2020	ENSG00000164778	CLASH
mirtarbase	MIMAT0000066	hsa-let-7e-5p	EN2	2020	ENSG00000164778	CLASH
mirtarbase	MIMAT0000066	hsa-let-7e-5p	EPHA4	2043	ENSG00000116106	PAR-CLIP
mirtarbase	MIMAT0000066	hsa-let-7e-5p	EPHA4	2043	ENSG00000116106	PAR-CLIP
mirtarbase	MIMAT0000066	hsa-let-7e-5p	FPR1	2357	ENSG00000171051	HITS-CLIP
mirtarbase	MIMAT0000066	hsa-let-7e-5p	FPR1	2357	ENSG00000171051	HITS-CLIP
mirtarbase	MIMAT0000066	hsa-let-7e-5p	FXN	2395	ENSG00000165060	PAR-CLIP
mirtarbase	MIMAT0000066	hsa-let-7e-5p	FXN	2395	ENSG00000165060	PAR-CLIP
mirtarbase	MIMAT0000066	hsa-let-7e-5p	GABPB1	2553	ENSG00000104064	PAR-CLIP//HITS-CLIP
mirtarbase	MIMAT0000066	hsa-let-7e-5p	GABPB1	2553	ENSG00000104064	PAR-CLIP//HITS-CLIP
mirtarbase	MIMAT0000066	hsa-let-7e-5p	GABPB1	2553	ENSG00000104064	PAR-CLIP
mirtarbase	MIMAT0000066	hsa-let-7e-5p	GABPB1	2553	ENSG00000104064	HITS-CLIP
mirtarbase	MIMAT0000066	hsa-let-7e-5p	GATM	2628	ENSG00000171766	PAR-CLIP
mirtarbase	MIMAT0000066	hsa-let-7e-5p	NR6A1	2649	ENSG00000148200	PAR-CLIP
mirtarbase	MIMAT0000066	hsa-let-7e-5p	NR6A1	2649	ENSG00000148200	PAR-CLIP
mirtarbase	MIMAT0000066	hsa-let-7e-5p	GLO1	2739	ENSG00000124767	PAR-CLIP
mirtarbase	MIMAT0000066	hsa-let-7e-5p	GLO1	2739	ENSG00000124767	PAR-CLIP
mirtarbase	MIMAT0000066	hsa-let-7e-5p	GLUL	2752	ENSG00000135821	CLASH
mirtarbase	MIMAT0000066	hsa-let-7e-5p	GLUL	2752	ENSG00000135821	CLASH
mirtarbase	MIMAT0000066	hsa-let-7e-5p	GNG5	2787	ENSG00000174021	CLASH//PAR-CLIP
mirtarbase	MIMAT0000066	hsa-let-7e-5p	GNG5	2787	ENSG00000174021	CLASH//PAR-CLIP
mirtarbase	MIMAT0000066	hsa-let-7e-5p	GNG5	2787	ENSG00000174021	CLASH//PAR-CLIP
mirtarbase	MIMAT0000066	hsa-let-7e-5p	GNG5	2787	ENSG00000174021	CLASH
mirtarbase	MIMAT0000066	hsa-let-7e-5p	GNG5	2787	ENSG00000174021	PAR-CLIP
mirtarbase	MIMAT0000066	hsa-let-7e-5p	GNG5	2787	ENSG00000174021	PAR-CLIP
mirtarbase	MIMAT0000066	hsa-let-7e-5p	GOLGA4	2803	ENSG00000144674	PAR-CLIP
mirtarbase	MIMAT0000066	hsa-let-7e-5p	GOLGA4	2803	ENSG00000144674	PAR-CLIP
mirtarbase	MIMAT0000066	hsa-let-7e-5p	GPM6B	2824	ENSG00000046653	CLASH
mirtarbase	MIMAT0000066	hsa-let-7e-5p	GPM6B	2824	ENSG00000046653	CLASH
mirtarbase	MIMAT0000066	hsa-let-7e-5p	GTF3C1	2975	ENSG00000077235	CLASH
mirtarbase	MIMAT0000066	hsa-let-7e-5p	GTF3C1	2975	ENSG00000077235	CLASH
mirtarbase	MIMAT0000066	hsa-let-7e-5p	NDST1	3340	ENSG00000070614	CLASH
mirtarbase	MIMAT0000066	hsa-let-7e-5p	NDST1	3340	ENSG00000070614	CLASH
mirtarbase	MIMAT0000066	hsa-let-7e-5p	IGF1R	3480	ENSG00000140443	CLASH//Luciferase reporter assay//qRT-PCR//Western blot//PAR-CLIP
mirtarbase	MIMAT0000066	hsa-let-7e-5p	IGF1R	3480	ENSG00000140443	CLASH//Luciferase reporter assay//qRT-PCR//Western blot//PAR-CLIP
mirtarbase	MIMAT0000066	hsa-let-7e-5p	IGF1R	3480	ENSG00000140443	CLASH//Luciferase reporter assay//qRT-PCR//Western blot//PAR-CLIP
mirtarbase	MIMAT0000066	hsa-let-7e-5p	IGF1R	3480	ENSG00000140443	CLASH//Luciferase reporter assay//qRT-PCR//Western blot//PAR-CLIP
mirtarbase	MIMAT0000066	hsa-let-7e-5p	IGF1R	3480	ENSG00000140443	CLASH//Luciferase reporter assay//qRT-PCR//Western blot//PAR-CLIP
mirtarbase	MIMAT0000066	hsa-let-7e-5p	IGF1R	3480	ENSG00000140443	CLASH//Luciferase reporter assay//qRT-PCR//Western blot//PAR-CLIP
mirtarbase	MIMAT0000066	hsa-let-7e-5p	IGF1R	3480	ENSG00000140443	Luciferase reporter assay//qRT-PCR//Western blot
mirtarbase	MIMAT0000066	hsa-let-7e-5p	IGF1R	3480	ENSG00000140443	CLASH
mirtarbase	MIMAT0000066	hsa-let-7e-5p	IGF1R	3480	ENSG00000140443	PAR-CLIP
mirtarbase	MIMAT0000066	hsa-let-7e-5p	IGF1R	3480	ENSG00000140443	PAR-CLIP
mirtarbase	MIMAT0000066	hsa-let-7e-5p	IGF1R	3480	ENSG00000140443	PAR-CLIP
mirtarbase	MIMAT0000066	hsa-let-7e-5p	IGF1R	3480	ENSG00000140443	PAR-CLIP
mirtarbase	MIMAT0000066	hsa-let-7e-5p	ITGA3	3675	ENSG00000005884	HITS-CLIP
mirtarbase	MIMAT0000066	hsa-let-7e-5p	ITGA3	3675	ENSG00000005884	HITS-CLIP
mirtarbase	MIMAT0000066	hsa-let-7e-5p	ITGA3	3675	ENSG00000005884	HITS-CLIP
mirtarbase	MIMAT0000066	hsa-let-7e-5p	ITGA3	3675	ENSG00000005884	HITS-CLIP
mirtarbase	MIMAT0000066	hsa-let-7e-5p	IVD	3712	ENSG00000128928	CLASH
mirtarbase	MIMAT0000066	hsa-let-7e-5p	IVD	3712	ENSG00000128928	CLASH
mirtarbase	MIMAT0000066	hsa-let-7e-5p	KPNA5	3841	ENSG00000196911	PAR-CLIP//HITS-CLIP
mirtarbase	MIMAT0000066	hsa-let-7e-5p	KPNA5	3841	ENSG00000196911	PAR-CLIP//HITS-CLIP
mirtarbase	MIMAT0000066	hsa-let-7e-5p	KPNA5	3841	ENSG00000196911	PAR-CLIP//HITS-CLIP
mirtarbase	MIMAT0000066	hsa-let-7e-5p	KPNA5	3841	ENSG00000196911	PAR-CLIP//HITS-CLIP
mirtarbase	MIMAT0000066	hsa-let-7e-5p	KPNA5	3841	ENSG00000196911	PAR-CLIP
mirtarbase	MIMAT0000066	hsa-let-7e-5p	KPNA5	3841	ENSG00000196911	PAR-CLIP
mirtarbase	MIMAT0000066	hsa-let-7e-5p	KPNA5	3841	ENSG00000196911	PAR-CLIP//HITS-CLIP
mirtarbase	MIMAT0000066	hsa-let-7e-5p	KPNA5	3841	ENSG00000196911	PAR-CLIP
mirtarbase	MIMAT0000066	hsa-let-7e-5p	RPSA	3921	ENSG00000168028	CLASH
mirtarbase	MIMAT0000066	hsa-let-7e-5p	RPSA	3921	ENSG00000168028	CLASH
mirtarbase	MIMAT0000066	hsa-let-7e-5p	LMNA	4000	ENSG00000160789	CLASH
mirtarbase	MIMAT0000066	hsa-let-7e-5p	LMNA	4000	ENSG00000160789	CLASH
mirtarbase	MIMAT0000066	hsa-let-7e-5p	MXD1	4084	ENSG00000059728	PAR-CLIP
mirtarbase	MIMAT0000066	hsa-let-7e-5p	MXD1	4084	ENSG00000059728	PAR-CLIP
mirtarbase	MIMAT0000066	hsa-let-7e-5p	MAGEA3	4102	ENSG00000221867	PAR-CLIP
mirtarbase	MIMAT0000066	hsa-let-7e-5p	MAGEA12	4111	ENSG00000213401	PAR-CLIP
mirtarbase	MIMAT0000066	hsa-let-7e-5p	MDM4	4194	ENSG00000198625	PAR-CLIP
mirtarbase	MIMAT0000066	hsa-let-7e-5p	MDM4	4194	ENSG00000198625	PAR-CLIP
mirtarbase	MIMAT0000066	hsa-let-7e-5p	MDM4	4194	ENSG00000198625	PAR-CLIP
mirtarbase	MIMAT0000066	hsa-let-7e-5p	MDM4	4194	ENSG00000198625	PAR-CLIP
mirtarbase	MIMAT0000066	hsa-let-7e-5p	MKI67	4288	ENSG00000148773	CLASH
mirtarbase	MIMAT0000066	hsa-let-7e-5p	MKI67	4288	ENSG00000148773	CLASH
mirtarbase	MIMAT0000066	hsa-let-7e-5p	MYO9B	4650	ENSG00000099331	CLASH
mirtarbase	MIMAT0000066	hsa-let-7e-5p	MYO9B	4650	ENSG00000099331	CLASH
mirtarbase	MIMAT0000066	hsa-let-7e-5p	NAP1L1	4673	ENSG00000187109	HITS-CLIP
mirtarbase	MIMAT0000066	hsa-let-7e-5p	NAP1L1	4673	ENSG00000187109	HITS-CLIP
mirtarbase	MIMAT0000066	hsa-let-7e-5p	NCBP1	4686	ENSG00000136937	CLASH
mirtarbase	MIMAT0000066	hsa-let-7e-5p	NCBP1	4686	ENSG00000136937	CLASH
mirtarbase	MIMAT0000066	hsa-let-7e-5p	NF1	4763	ENSG00000196712	CLASH
mirtarbase	MIMAT0000066	hsa-let-7e-5p	NF1	4763	ENSG00000196712	CLASH
mirtarbase	MIMAT0000066	hsa-let-7e-5p	SLC11A2	4891	ENSG00000110911	PAR-CLIP//HITS-CLIP
mirtarbase	MIMAT0000066	hsa-let-7e-5p	SLC11A2	4891	ENSG00000110911	PAR-CLIP//HITS-CLIP
mirtarbase	MIMAT0000066	hsa-let-7e-5p	SLC11A2	4891	ENSG00000110911	PAR-CLIP
mirtarbase	MIMAT0000066	hsa-let-7e-5p	SLC11A2	4891	ENSG00000110911	HITS-CLIP
mirtarbase	MIMAT0000066	hsa-let-7e-5p	NUCB2	4925	ENSG00000070081	PAR-CLIP
mirtarbase	MIMAT0000066	hsa-let-7e-5p	NUCB2	4925	ENSG00000070081	PAR-CLIP
mirtarbase	MIMAT0000066	hsa-let-7e-5p	PAFAH2	5051	ENSG00000158006	HITS-CLIP
mirtarbase	MIMAT0000066	hsa-let-7e-5p	PAFAH2	5051	ENSG00000158006	HITS-CLIP
mirtarbase	MIMAT0000066	hsa-let-7e-5p	PAX3	5077	ENSG00000135903	CLASH
mirtarbase	MIMAT0000066	hsa-let-7e-5p	PAX3	5077	ENSG00000135903	CLASH
mirtarbase	MIMAT0000066	hsa-let-7e-5p	PDGFB	5155	ENSG00000100311	PAR-CLIP
mirtarbase	MIMAT0000066	hsa-let-7e-5p	PGD	5226	ENSG00000142657	CLASH
mirtarbase	MIMAT0000066	hsa-let-7e-5p	PGD	5226	ENSG00000142657	CLASH
mirtarbase	MIMAT0000066	hsa-let-7e-5p	PHKA1	5255	ENSG00000067177	CLASH
mirtarbase	MIMAT0000066	hsa-let-7e-5p	PHKA1	5255	ENSG00000067177	CLASH
mirtarbase	MIMAT0000066	hsa-let-7e-5p	PLAGL2	5326	ENSG00000126003	PAR-CLIP
mirtarbase	MIMAT0000066	hsa-let-7e-5p	PLAGL2	5326	ENSG00000126003	PAR-CLIP
mirtarbase	MIMAT0000066	hsa-let-7e-5p	PLAGL2	5326	ENSG00000126003	PAR-CLIP
mirtarbase	MIMAT0000066	hsa-let-7e-5p	PLAGL2	5326	ENSG00000126003	PAR-CLIP
mirtarbase	MIMAT0000066	hsa-let-7e-5p	PLCG2	5336	ENSG00000197943	PAR-CLIP
mirtarbase	MIMAT0000066	hsa-let-7e-5p	PLCG2	5336	ENSG00000197943	PAR-CLIP
mirtarbase	MIMAT0000066	hsa-let-7e-5p	PLCG2	5336	ENSG00000197943	PAR-CLIP
mirtarbase	MIMAT0000066	hsa-let-7e-5p	PLCG2	5336	ENSG00000197943	PAR-CLIP
mirtarbase	MIMAT0000066	hsa-let-7e-5p	PMAIP1	5366	ENSG00000141682	PAR-CLIP
mirtarbase	MIMAT0000066	hsa-let-7e-5p	PMAIP1	5366	ENSG00000141682	PAR-CLIP
mirtarbase	MIMAT0000066	hsa-let-7e-5p	POLD1	5424	ENSG00000062822	CLASH
mirtarbase	MIMAT0000066	hsa-let-7e-5p	POLD1	5424	ENSG00000062822	CLASH
mirtarbase	MIMAT0000066	hsa-let-7e-5p	POLR2D	5433	ENSG00000144231	PAR-CLIP
mirtarbase	MIMAT0000066	hsa-let-7e-5p	POLR2D	5433	ENSG00000144231	PAR-CLIP
mirtarbase	MIMAT0000066	hsa-let-7e-5p	POLR2D	5433	ENSG00000144231	PAR-CLIP
mirtarbase	MIMAT0000066	hsa-let-7e-5p	POLR2D	5433	ENSG00000144231	PAR-CLIP
mirtarbase	MIMAT0000066	hsa-let-7e-5p	POLR2D	5433	ENSG00000144231	PAR-CLIP
mirtarbase	MIMAT0000066	hsa-let-7e-5p	POLR2D	5433	ENSG00000144231	PAR-CLIP
mirtarbase	MIMAT0000066	hsa-let-7e-5p	CTSA	5476	ENSG00000064601	CLASH
mirtarbase	MIMAT0000066	hsa-let-7e-5p	CTSA	5476	ENSG00000064601	CLASH
mirtarbase	MIMAT0000066	hsa-let-7e-5p	PPP1R2	5504	ENSG00000184203	CLASH
mirtarbase	MIMAT0000066	hsa-let-7e-5p	PPP1R2	5504	ENSG00000184203	CLASH
mirtarbase	MIMAT0000066	hsa-let-7e-5p	PPP1R10	5514	ENSG00000204569	CLASH
mirtarbase	MIMAT0000066	hsa-let-7e-5p	PPP1R10	5514	ENSG00000204569	CLASH
mirtarbase	MIMAT0000066	hsa-let-7e-5p	PPP2R1A	5518	ENSG00000105568	CLASH
mirtarbase	MIMAT0000066	hsa-let-7e-5p	PPP2R1A	5518	ENSG00000105568	CLASH
mirtarbase	MIMAT0000066	hsa-let-7e-5p	MAPK6	5597	ENSG00000069956	PAR-CLIP
mirtarbase	MIMAT0000066	hsa-let-7e-5p	MAPK6	5597	ENSG00000069956	PAR-CLIP
mirtarbase	MIMAT0000066	hsa-let-7e-5p	PSMD2	5708	ENSG00000175166	CLASH
mirtarbase	MIMAT0000066	hsa-let-7e-5p	PSMD2	5708	ENSG00000175166	CLASH
mirtarbase	MIMAT0000066	hsa-let-7e-5p	QSOX1	5768	ENSG00000116260	CLASH
mirtarbase	MIMAT0000066	hsa-let-7e-5p	QSOX1	5768	ENSG00000116260	CLASH
mirtarbase	MIMAT0000066	hsa-let-7e-5p	PYCR1	5831	ENSG00000183010	CLASH
mirtarbase	MIMAT0000066	hsa-let-7e-5p	PYCR1	5831	ENSG00000183010	CLASH
mirtarbase	MIMAT0000066	hsa-let-7e-5p	QDPR	5860	ENSG00000151552	PAR-CLIP
mirtarbase	MIMAT0000066	hsa-let-7e-5p	QDPR	5860	ENSG00000151552	PAR-CLIP
mirtarbase	MIMAT0000066	hsa-let-7e-5p	RAP1A	5906	ENSG00000116473	CLASH
mirtarbase	MIMAT0000066	hsa-let-7e-5p	RAP1A	5906	ENSG00000116473	CLASH
mirtarbase	MIMAT0000066	hsa-let-7e-5p	RBM4	5936	ENSG00000173933	CLASH
mirtarbase	MIMAT0000066	hsa-let-7e-5p	RBM4	5936	ENSG00000173933	CLASH
mirtarbase	MIMAT0000066	hsa-let-7e-5p	RFC2	5982	ENSG00000049541	HITS-CLIP
mirtarbase	MIMAT0000066	hsa-let-7e-5p	RFC2	5982	ENSG00000049541	HITS-CLIP
mirtarbase	MIMAT0000066	hsa-let-7e-5p	RPL10	6134	ENSG00000147403	CLASH
mirtarbase	MIMAT0000066	hsa-let-7e-5p	RPL10	6134	ENSG00000147403	CLASH
mirtarbase	MIMAT0000066	hsa-let-7e-5p	RPL12	6136	ENSG00000197958	CLASH
mirtarbase	MIMAT0000066	hsa-let-7e-5p	RPL12	6136	ENSG00000197958	CLASH
mirtarbase	MIMAT0000066	hsa-let-7e-5p	RPL27A	6157	ENSG00000166441	CLASH
mirtarbase	MIMAT0000066	hsa-let-7e-5p	RPL27A	6157	ENSG00000166441	CLASH
mirtarbase	MIMAT0000066	hsa-let-7e-5p	MRPL12	6182	ENSG00000262814	PAR-CLIP
mirtarbase	MIMAT0000066	hsa-let-7e-5p	MRPL12	6182	ENSG00000262814	PAR-CLIP
mirtarbase	MIMAT0000066	hsa-let-7e-5p	RPS27	6232	ENSG00000177954	CLASH
mirtarbase	MIMAT0000066	hsa-let-7e-5p	RPS27	6232	ENSG00000177954	CLASH
mirtarbase	MIMAT0000066	hsa-let-7e-5p	RRAD	6236	ENSG00000166592	PAR-CLIP
mirtarbase	MIMAT0000066	hsa-let-7e-5p	RRAD	6236	ENSG00000166592	PAR-CLIP
mirtarbase	MIMAT0000066	hsa-let-7e-5p	RRM1	6240	ENSG00000167325	PAR-CLIP
mirtarbase	MIMAT0000066	hsa-let-7e-5p	RRM1	6240	ENSG00000167325	PAR-CLIP
mirtarbase	MIMAT0000066	hsa-let-7e-5p	RRM2	6241	ENSG00000171848	PAR-CLIP
mirtarbase	MIMAT0000066	hsa-let-7e-5p	RRM2	6241	ENSG00000171848	PAR-CLIP
mirtarbase	MIMAT0000066	hsa-let-7e-5p	SALL1	6299	ENSG00000103449	CLASH
mirtarbase	MIMAT0000066	hsa-let-7e-5p	SALL1	6299	ENSG00000103449	CLASH
mirtarbase	MIMAT0000066	hsa-let-7e-5p	MSMO1	6307	ENSG00000052802	CLASH
mirtarbase	MIMAT0000066	hsa-let-7e-5p	MSMO1	6307	ENSG00000052802	CLASH
mirtarbase	MIMAT0000066	hsa-let-7e-5p	SCD	6319	ENSG00000099194	CLASH
mirtarbase	MIMAT0000066	hsa-let-7e-5p	SCD	6319	ENSG00000099194	CLASH
mirtarbase	MIMAT0000066	hsa-let-7e-5p	SRSF2	6427	ENSG00000161547	CLASH
mirtarbase	MIMAT0000066	hsa-let-7e-5p	SRSF2	6427	ENSG00000161547	CLASH
mirtarbase	MIMAT0000066	hsa-let-7e-5p	SLC12A4	6560	ENSG00000124067	CLASH
mirtarbase	MIMAT0000066	hsa-let-7e-5p	SLC12A4	6560	ENSG00000124067	CLASH
mirtarbase	MIMAT0000066	hsa-let-7e-5p	SLC20A1	6574	ENSG00000144136	PAR-CLIP
mirtarbase	MIMAT0000066	hsa-let-7e-5p	SLC20A1	6574	ENSG00000144136	PAR-CLIP
mirtarbase	MIMAT0000066	hsa-let-7e-5p	SLC20A1	6574	ENSG00000144136	PAR-CLIP
mirtarbase	MIMAT0000066	hsa-let-7e-5p	SLC20A1	6574	ENSG00000144136	PAR-CLIP
mirtarbase	MIMAT0000066	hsa-let-7e-5p	SPTBN1	6711	ENSG00000115306	CLASH
mirtarbase	MIMAT0000066	hsa-let-7e-5p	SPTBN1	6711	ENSG00000115306	CLASH
mirtarbase	MIMAT0000066	hsa-let-7e-5p	SQLE	6713	ENSG00000104549	CLASH
mirtarbase	MIMAT0000066	hsa-let-7e-5p	SQLE	6713	ENSG00000104549	CLASH
mirtarbase	MIMAT0000066	hsa-let-7e-5p	SREBF1	6720	ENSG00000072310	CLASH
mirtarbase	MIMAT0000066	hsa-let-7e-5p	SREBF1	6720	ENSG00000072310	CLASH
mirtarbase	MIMAT0000066	hsa-let-7e-5p	STAT2	6773	ENSG00000170581	HITS-CLIP
mirtarbase	MIMAT0000066	hsa-let-7e-5p	STAT2	6773	ENSG00000170581	HITS-CLIP
mirtarbase	MIMAT0000066	hsa-let-7e-5p	STRN	6801	ENSG00000115808	PAR-CLIP
mirtarbase	MIMAT0000066	hsa-let-7e-5p	STRN	6801	ENSG00000115808	PAR-CLIP
mirtarbase	MIMAT0000066	hsa-let-7e-5p	STRN	6801	ENSG00000115808	PAR-CLIP
mirtarbase	MIMAT0000066	hsa-let-7e-5p	STRN	6801	ENSG00000115808	PAR-CLIP
mirtarbase	MIMAT0000066	hsa-let-7e-5p	STX3	6809	ENSG00000166900	PAR-CLIP
mirtarbase	MIMAT0000066	hsa-let-7e-5p	SUPT4H1	6827	ENSG00000213246	CLASH
mirtarbase	MIMAT0000066	hsa-let-7e-5p	SUPT4H1	6827	ENSG00000213246	CLASH
mirtarbase	MIMAT0000066	hsa-let-7e-5p	SVIL	6840	ENSG00000197321	CLASH
mirtarbase	MIMAT0000066	hsa-let-7e-5p	SVIL	6840	ENSG00000197321	CLASH
mirtarbase	MIMAT0000066	hsa-let-7e-5p	SYT1	6857	ENSG00000067715	PAR-CLIP
mirtarbase	MIMAT0000066	hsa-let-7e-5p	TCF4	6925	ENSG00000196628	CLASH
mirtarbase	MIMAT0000066	hsa-let-7e-5p	TCF4	6925	ENSG00000196628	CLASH
mirtarbase	MIMAT0000066	hsa-let-7e-5p	TERF1	7013	ENSG00000147601	CLASH
mirtarbase	MIMAT0000066	hsa-let-7e-5p	TERF1	7013	ENSG00000147601	CLASH
mirtarbase	MIMAT0000066	hsa-let-7e-5p	TRAPPC10	7109	ENSG00000160218	PAR-CLIP
mirtarbase	MIMAT0000066	hsa-let-7e-5p	TNFAIP3	7128	ENSG00000118503	Luciferase reporter assay//Western blot
mirtarbase	MIMAT0000066	hsa-let-7e-5p	TXNRD1	7296	ENSG00000198431	CLASH
mirtarbase	MIMAT0000066	hsa-let-7e-5p	TXNRD1	7296	ENSG00000198431	CLASH
mirtarbase	MIMAT0000066	hsa-let-7e-5p	UBE2H	7328	ENSG00000186591	CLASH
mirtarbase	MIMAT0000066	hsa-let-7e-5p	UBE2H	7328	ENSG00000186591	CLASH
mirtarbase	MIMAT0000066	hsa-let-7e-5p	UBE2V2	7336	ENSG00000169139	CLASH
mirtarbase	MIMAT0000066	hsa-let-7e-5p	UBE2V2	7336	ENSG00000169139	CLASH
mirtarbase	MIMAT0000066	hsa-let-7e-5p	VCL	7414	ENSG00000035403	PAR-CLIP
mirtarbase	MIMAT0000066	hsa-let-7e-5p	VCL	7414	ENSG00000035403	PAR-CLIP
mirtarbase	MIMAT0000066	hsa-let-7e-5p	TRPV1	7442	ENSG00000196689	CLASH
mirtarbase	MIMAT0000066	hsa-let-7e-5p	TRPV1	7442	ENSG00000196689	CLASH
mirtarbase	MIMAT0000066	hsa-let-7e-5p	YWHAG	7532	ENSG00000170027	CLASH
mirtarbase	MIMAT0000066	hsa-let-7e-5p	YWHAG	7532	ENSG00000170027	CLASH
mirtarbase	MIMAT0000066	hsa-let-7e-5p	ZNF28	7576	ENSG00000198538	PAR-CLIP
mirtarbase	MIMAT0000066	hsa-let-7e-5p	ZNF28	7576	ENSG00000198538	PAR-CLIP
mirtarbase	MIMAT0000066	hsa-let-7e-5p	ZNF200	7752	ENSG00000010539	PAR-CLIP
mirtarbase	MIMAT0000066	hsa-let-7e-5p	ZNF200	7752	ENSG00000010539	PAR-CLIP
mirtarbase	MIMAT0000066	hsa-let-7e-5p	ZNF200	7752	ENSG00000010539	PAR-CLIP
mirtarbase	MIMAT0000066	hsa-let-7e-5p	ZNF200	7752	ENSG00000010539	PAR-CLIP
mirtarbase	MIMAT0000066	hsa-let-7e-5p	ZFAND5	7763	ENSG00000107372	CLASH
mirtarbase	MIMAT0000066	hsa-let-7e-5p	ZFAND5	7763	ENSG00000107372	CLASH
mirtarbase	MIMAT0000066	hsa-let-7e-5p	ZNF236	7776	ENSG00000130856	CLASH
mirtarbase	MIMAT0000066	hsa-let-7e-5p	ZNF236	7776	ENSG00000130856	CLASH
mirtarbase	MIMAT0000066	hsa-let-7e-5p	LUZP1	7798	ENSG00000169641	CLASH
mirtarbase	MIMAT0000066	hsa-let-7e-5p	LUZP1	7798	ENSG00000169641	CLASH
mirtarbase	MIMAT0000066	hsa-let-7e-5p	PRRC2A	7916	ENSG00000226618	CLASH
mirtarbase	MIMAT0000066	hsa-let-7e-5p	PRRC2A	7916	ENSG00000226618	CLASH
mirtarbase	MIMAT0000066	hsa-let-7e-5p	STAM	8027	ENSG00000136738	CLASH
mirtarbase	MIMAT0000066	hsa-let-7e-5p	STAM	8027	ENSG00000136738	CLASH
mirtarbase	MIMAT0000066	hsa-let-7e-5p	MLLT10	8028	ENSG00000078403	PAR-CLIP
mirtarbase	MIMAT0000066	hsa-let-7e-5p	MLLT10	8028	ENSG00000078403	PAR-CLIP
mirtarbase	MIMAT0000066	hsa-let-7e-5p	MLLT10	8028	ENSG00000078403	PAR-CLIP
mirtarbase	MIMAT0000066	hsa-let-7e-5p	MLLT10	8028	ENSG00000078403	PAR-CLIP
mirtarbase	MIMAT0000066	hsa-let-7e-5p	KMT2D	8085	ENSG00000167548	PAR-CLIP
mirtarbase	MIMAT0000066	hsa-let-7e-5p	KMT2D	8085	ENSG00000167548	PAR-CLIP
mirtarbase	MIMAT0000066	hsa-let-7e-5p	KMT2D	8085	ENSG00000167548	PAR-CLIP
mirtarbase	MIMAT0000066	hsa-let-7e-5p	KMT2D	8085	ENSG00000167548	PAR-CLIP
mirtarbase	MIMAT0000066	hsa-let-7e-5p	COIL	8161	ENSG00000121058	PAR-CLIP
mirtarbase	MIMAT0000066	hsa-let-7e-5p	COIL	8161	ENSG00000121058	PAR-CLIP
mirtarbase	MIMAT0000066	hsa-let-7e-5p	COIL	8161	ENSG00000121058	PAR-CLIP
mirtarbase	MIMAT0000066	hsa-let-7e-5p	COIL	8161	ENSG00000121058	PAR-CLIP
mirtarbase	MIMAT0000066	hsa-let-7e-5p	COIL	8161	ENSG00000121058	PAR-CLIP
mirtarbase	MIMAT0000066	hsa-let-7e-5p	COIL	8161	ENSG00000121058	PAR-CLIP
mirtarbase	MIMAT0000066	hsa-let-7e-5p	ARID1A	8289	ENSG00000117713	CLASH
mirtarbase	MIMAT0000066	hsa-let-7e-5p	ARID1A	8289	ENSG00000117713	CLASH
mirtarbase	MIMAT0000066	hsa-let-7e-5p	TRRAP	8295	ENSG00000196367	CLASH
mirtarbase	MIMAT0000066	hsa-let-7e-5p	TRRAP	8295	ENSG00000196367	CLASH
mirtarbase	MIMAT0000066	hsa-let-7e-5p	DYRK3	8444	ENSG00000143479	PAR-CLIP
mirtarbase	MIMAT0000066	hsa-let-7e-5p	DYRK2	8445	ENSG00000127334	CLASH
mirtarbase	MIMAT0000066	hsa-let-7e-5p	DYRK2	8445	ENSG00000127334	CLASH
mirtarbase	MIMAT0000066	hsa-let-7e-5p	EIF3J	8669	ENSG00000104131	Luciferase reporter assay//Other//Reporter assay
mirtarbase	MIMAT0000066	hsa-let-7e-5p	EIF3J	8669	ENSG00000104131	Luciferase reporter assay//Reporter assay
mirtarbase	MIMAT0000066	hsa-let-7e-5p	RNMT	8731	ENSG00000101654	CLASH
mirtarbase	MIMAT0000066	hsa-let-7e-5p	RNMT	8731	ENSG00000101654	CLASH
mirtarbase	MIMAT0000066	hsa-let-7e-5p	TNFSF9	8744	ENSG00000125657	PAR-CLIP
mirtarbase	MIMAT0000066	hsa-let-7e-5p	TNFSF9	8744	ENSG00000125657	PAR-CLIP
mirtarbase	MIMAT0000066	hsa-let-7e-5p	TNFSF9	8744	ENSG00000125657	PAR-CLIP
mirtarbase	MIMAT0000066	hsa-let-7e-5p	TNFSF9	8744	ENSG00000125657	PAR-CLIP
mirtarbase	MIMAT0000066	hsa-let-7e-5p	TNFRSF10B	8795	ENSG00000120889	qRT-PCR//Western blot
mirtarbase	MIMAT0000066	hsa-let-7e-5p	TNFRSF10B	8795	ENSG00000120889	qRT-PCR//Western blot
mirtarbase	MIMAT0000066	hsa-let-7e-5p	PEX11B	8799	ENSG00000131779	PAR-CLIP
mirtarbase	MIMAT0000066	hsa-let-7e-5p	PEX11B	8799	ENSG00000131779	PAR-CLIP
mirtarbase	MIMAT0000066	hsa-let-7e-5p	GMPS	8833	ENSG00000163655	CLASH
mirtarbase	MIMAT0000066	hsa-let-7e-5p	GMPS	8833	ENSG00000163655	CLASH
mirtarbase	MIMAT0000066	hsa-let-7e-5p	SLC5A6	8884	ENSG00000138074	PAR-CLIP
mirtarbase	MIMAT0000066	hsa-let-7e-5p	SLC5A6	8884	ENSG00000138074	PAR-CLIP
mirtarbase	MIMAT0000066	hsa-let-7e-5p	SLC5A6	8884	ENSG00000138074	PAR-CLIP
mirtarbase	MIMAT0000066	hsa-let-7e-5p	SLC5A6	8884	ENSG00000138074	PAR-CLIP
mirtarbase	MIMAT0000066	hsa-let-7e-5p	MBD2	8932	ENSG00000134046	PAR-CLIP
mirtarbase	MIMAT0000066	hsa-let-7e-5p	MBD2	8932	ENSG00000134046	PAR-CLIP
mirtarbase	MIMAT0000066	hsa-let-7e-5p	MBD2	8932	ENSG00000134046	PAR-CLIP
mirtarbase	MIMAT0000066	hsa-let-7e-5p	MBD2	8932	ENSG00000134046	PAR-CLIP
mirtarbase	MIMAT0000066	hsa-let-7e-5p	MBD2	8932	ENSG00000134046	PAR-CLIP
mirtarbase	MIMAT0000066	hsa-let-7e-5p	MBD2	8932	ENSG00000134046	PAR-CLIP
mirtarbase	MIMAT0000066	hsa-let-7e-5p	MBD2	8932	ENSG00000134046	PAR-CLIP
mirtarbase	MIMAT0000066	hsa-let-7e-5p	MBD2	8932	ENSG00000134046	PAR-CLIP
mirtarbase	MIMAT0000066	hsa-let-7e-5p	BAZ1B	9031	ENSG00000009954	CLASH
mirtarbase	MIMAT0000066	hsa-let-7e-5p	BAZ1B	9031	ENSG00000009954	CLASH
mirtarbase	MIMAT0000066	hsa-let-7e-5p	SPAG9	9043	ENSG00000008294	CLASH
mirtarbase	MIMAT0000066	hsa-let-7e-5p	SPAG9	9043	ENSG00000008294	CLASH
mirtarbase	MIMAT0000066	hsa-let-7e-5p	CLDN12	9069	ENSG00000157224	PAR-CLIP
mirtarbase	MIMAT0000066	hsa-let-7e-5p	CLDN12	9069	ENSG00000157224	PAR-CLIP
mirtarbase	MIMAT0000066	hsa-let-7e-5p	CLDN12	9069	ENSG00000157224	PAR-CLIP
mirtarbase	MIMAT0000066	hsa-let-7e-5p	CLDN12	9069	ENSG00000157224	PAR-CLIP
mirtarbase	MIMAT0000066	hsa-let-7e-5p	CLDN12	9069	ENSG00000157224	PAR-CLIP
mirtarbase	MIMAT0000066	hsa-let-7e-5p	CLDN12	9069	ENSG00000157224	PAR-CLIP
mirtarbase	MIMAT0000066	hsa-let-7e-5p	CLDN12	9069	ENSG00000157224	PAR-CLIP
mirtarbase	MIMAT0000066	hsa-let-7e-5p	CLDN12	9069	ENSG00000157224	PAR-CLIP
mirtarbase	MIMAT0000066	hsa-let-7e-5p	ATG12	9140	ENSG00000145782	PAR-CLIP
mirtarbase	MIMAT0000066	hsa-let-7e-5p	ATG12	9140	ENSG00000145782	PAR-CLIP
mirtarbase	MIMAT0000066	hsa-let-7e-5p	NOLC1	9221	ENSG00000166197	CLASH
mirtarbase	MIMAT0000066	hsa-let-7e-5p	NOLC1	9221	ENSG00000166197	CLASH
mirtarbase	MIMAT0000066	hsa-let-7e-5p	ATP6V1F	9296	ENSG00000128524	PAR-CLIP
mirtarbase	MIMAT0000066	hsa-let-7e-5p	ATP6V1F	9296	ENSG00000128524	PAR-CLIP
mirtarbase	MIMAT0000066	hsa-let-7e-5p	ATP6V1F	9296	ENSG00000128524	PAR-CLIP
mirtarbase	MIMAT0000066	hsa-let-7e-5p	ATP6V1F	9296	ENSG00000128524	PAR-CLIP
mirtarbase	MIMAT0000066	hsa-let-7e-5p	ATP6V1F	9296	ENSG00000128524	PAR-CLIP
mirtarbase	MIMAT0000066	hsa-let-7e-5p	ATP6V1F	9296	ENSG00000128524	PAR-CLIP
mirtarbase	MIMAT0000066	hsa-let-7e-5p	ATP6V1F	9296	ENSG00000128524	PAR-CLIP
mirtarbase	MIMAT0000066	hsa-let-7e-5p	ATP6V1F	9296	ENSG00000128524	PAR-CLIP
mirtarbase	MIMAT0000066	hsa-let-7e-5p	HAND1	9421	ENSG00000113196	PAR-CLIP
mirtarbase	MIMAT0000066	hsa-let-7e-5p	HAND1	9421	ENSG00000113196	PAR-CLIP
mirtarbase	MIMAT0000066	hsa-let-7e-5p	ONECUT2	9480	ENSG00000119547	PAR-CLIP
mirtarbase	MIMAT0000066	hsa-let-7e-5p	ONECUT2	9480	ENSG00000119547	PAR-CLIP
mirtarbase	MIMAT0000066	hsa-let-7e-5p	ATP6V1G1	9550	ENSG00000136888	PAR-CLIP
mirtarbase	MIMAT0000066	hsa-let-7e-5p	ATP6V1G1	9550	ENSG00000136888	PAR-CLIP
mirtarbase	MIMAT0000066	hsa-let-7e-5p	ATP6V1G1	9550	ENSG00000136888	PAR-CLIP
mirtarbase	MIMAT0000066	hsa-let-7e-5p	ATP6V1G1	9550	ENSG00000136888	PAR-CLIP
mirtarbase	MIMAT0000066	hsa-let-7e-5p	ATP6V1G1	9550	ENSG00000136888	PAR-CLIP
mirtarbase	MIMAT0000066	hsa-let-7e-5p	ATP6V1G1	9550	ENSG00000136888	PAR-CLIP
mirtarbase	MIMAT0000066	hsa-let-7e-5p	NUP155	9631	ENSG00000113569	CLASH//PAR-CLIP
mirtarbase	MIMAT0000066	hsa-let-7e-5p	NUP155	9631	ENSG00000113569	CLASH//PAR-CLIP
mirtarbase	MIMAT0000066	hsa-let-7e-5p	NUP155	9631	ENSG00000113569	CLASH//PAR-CLIP
mirtarbase	MIMAT0000066	hsa-let-7e-5p	NUP155	9631	ENSG00000113569	CLASH//PAR-CLIP
mirtarbase	MIMAT0000066	hsa-let-7e-5p	NUP155	9631	ENSG00000113569	CLASH
mirtarbase	MIMAT0000066	hsa-let-7e-5p	NUP155	9631	ENSG00000113569	PAR-CLIP
mirtarbase	MIMAT0000066	hsa-let-7e-5p	NUP155	9631	ENSG00000113569	PAR-CLIP
mirtarbase	MIMAT0000066	hsa-let-7e-5p	NUP155	9631	ENSG00000113569	PAR-CLIP
mirtarbase	MIMAT0000066	hsa-let-7e-5p	VGLL4	9686	ENSG00000144560	CLASH
mirtarbase	MIMAT0000066	hsa-let-7e-5p	VGLL4	9686	ENSG00000144560	CLASH
mirtarbase	MIMAT0000066	hsa-let-7e-5p	BZW1	9689	ENSG00000082153	PAR-CLIP
mirtarbase	MIMAT0000066	hsa-let-7e-5p	BZW1	9689	ENSG00000082153	PAR-CLIP
mirtarbase	MIMAT0000066	hsa-let-7e-5p	BZW1	9689	ENSG00000082153	PAR-CLIP
mirtarbase	MIMAT0000066	hsa-let-7e-5p	BZW1	9689	ENSG00000082153	PAR-CLIP
mirtarbase	MIMAT0000066	hsa-let-7e-5p	BZW1	9689	ENSG00000082153	PAR-CLIP
mirtarbase	MIMAT0000066	hsa-let-7e-5p	BZW1	9689	ENSG00000082153	PAR-CLIP
mirtarbase	MIMAT0000066	hsa-let-7e-5p	ESPL1	9700	ENSG00000135476	PAR-CLIP
mirtarbase	MIMAT0000066	hsa-let-7e-5p	ESPL1	9700	ENSG00000135476	PAR-CLIP
mirtarbase	MIMAT0000066	hsa-let-7e-5p	ESPL1	9700	ENSG00000135476	PAR-CLIP
mirtarbase	MIMAT0000066	hsa-let-7e-5p	ESPL1	9700	ENSG00000135476	PAR-CLIP
mirtarbase	MIMAT0000066	hsa-let-7e-5p	SNX17	9784	ENSG00000115234	PAR-CLIP
mirtarbase	MIMAT0000066	hsa-let-7e-5p	SNX17	9784	ENSG00000115234	PAR-CLIP
mirtarbase	MIMAT0000066	hsa-let-7e-5p	TSC22D2	9819	ENSG00000196428	PAR-CLIP
mirtarbase	MIMAT0000066	hsa-let-7e-5p	TSC22D2	9819	ENSG00000196428	PAR-CLIP
mirtarbase	MIMAT0000066	hsa-let-7e-5p	TSC22D2	9819	ENSG00000196428	PAR-CLIP
mirtarbase	MIMAT0000066	hsa-let-7e-5p	TSC22D2	9819	ENSG00000196428	PAR-CLIP
mirtarbase	MIMAT0000066	hsa-let-7e-5p	AREL1	9870	ENSG00000119682	PAR-CLIP
mirtarbase	MIMAT0000066	hsa-let-7e-5p	AREL1	9870	ENSG00000119682	PAR-CLIP
mirtarbase	MIMAT0000066	hsa-let-7e-5p	UBAP2L	9898	ENSG00000143569	CLASH
mirtarbase	MIMAT0000066	hsa-let-7e-5p	UBAP2L	9898	ENSG00000143569	CLASH
mirtarbase	MIMAT0000066	hsa-let-7e-5p	ARNT2	9915	ENSG00000172379	CLASH
mirtarbase	MIMAT0000066	hsa-let-7e-5p	ARNT2	9915	ENSG00000172379	CLASH
mirtarbase	MIMAT0000066	hsa-let-7e-5p	ZBTB5	9925	ENSG00000168795	PAR-CLIP
mirtarbase	MIMAT0000066	hsa-let-7e-5p	ZBTB5	9925	ENSG00000168795	PAR-CLIP
mirtarbase	MIMAT0000066	hsa-let-7e-5p	ZBTB5	9925	ENSG00000168795	PAR-CLIP
mirtarbase	MIMAT0000066	hsa-let-7e-5p	ZBTB5	9925	ENSG00000168795	PAR-CLIP
mirtarbase	MIMAT0000066	hsa-let-7e-5p	ZBTB5	9925	ENSG00000168795	PAR-CLIP
mirtarbase	MIMAT0000066	hsa-let-7e-5p	ZBTB5	9925	ENSG00000168795	PAR-CLIP
mirtarbase	MIMAT0000066	hsa-let-7e-5p	ZBTB5	9925	ENSG00000168795	PAR-CLIP
mirtarbase	MIMAT0000066	hsa-let-7e-5p	ZBTB5	9925	ENSG00000168795	PAR-CLIP
mirtarbase	MIMAT0000066	hsa-let-7e-5p	LHFPL2	10184	ENSG00000145685	CLASH
mirtarbase	MIMAT0000066	hsa-let-7e-5p	LHFPL2	10184	ENSG00000145685	CLASH
mirtarbase	MIMAT0000066	hsa-let-7e-5p	ZNF443	10224	ENSG00000180855	HITS-CLIP
mirtarbase	MIMAT0000066	hsa-let-7e-5p	ZNF443	10224	ENSG00000180855	HITS-CLIP
mirtarbase	MIMAT0000066	hsa-let-7e-5p	AKAP8	10270	ENSG00000105127	PAR-CLIP
mirtarbase	MIMAT0000066	hsa-let-7e-5p	AKAP8	10270	ENSG00000105127	PAR-CLIP
mirtarbase	MIMAT0000066	hsa-let-7e-5p	AKAP8	10270	ENSG00000105127	PAR-CLIP
mirtarbase	MIMAT0000066	hsa-let-7e-5p	AKAP8	10270	ENSG00000105127	PAR-CLIP
mirtarbase	MIMAT0000066	hsa-let-7e-5p	PCGF3	10336	ENSG00000185619	PAR-CLIP
mirtarbase	MIMAT0000066	hsa-let-7e-5p	PCGF3	10336	ENSG00000185619	PAR-CLIP
mirtarbase	MIMAT0000066	hsa-let-7e-5p	PCGF3	10336	ENSG00000185619	PAR-CLIP
mirtarbase	MIMAT0000066	hsa-let-7e-5p	PCGF3	10336	ENSG00000185619	PAR-CLIP
mirtarbase	MIMAT0000066	hsa-let-7e-5p	PCGF3	10336	ENSG00000185619	PAR-CLIP
mirtarbase	MIMAT0000066	hsa-let-7e-5p	PCGF3	10336	ENSG00000185619	PAR-CLIP
mirtarbase	MIMAT0000066	hsa-let-7e-5p	TUBA1B	10376	ENSG00000123416	CLASH
mirtarbase	MIMAT0000066	hsa-let-7e-5p	TUBA1B	10376	ENSG00000123416	CLASH
mirtarbase	MIMAT0000066	hsa-let-7e-5p	TUBB4A	10382	ENSG00000104833	PAR-CLIP
mirtarbase	MIMAT0000066	hsa-let-7e-5p	TUBB4B	10383	ENSG00000188229	CLASH
mirtarbase	MIMAT0000066	hsa-let-7e-5p	TUBB4B	10383	ENSG00000188229	CLASH
mirtarbase	MIMAT0000066	hsa-let-7e-5p	LRRC41	10489	ENSG00000132128	CLASH
mirtarbase	MIMAT0000066	hsa-let-7e-5p	LRRC41	10489	ENSG00000132128	CLASH
mirtarbase	MIMAT0000066	hsa-let-7e-5p	SEMA4B	10509	ENSG00000185033	CLASH
mirtarbase	MIMAT0000066	hsa-let-7e-5p	SEMA4B	10509	ENSG00000185033	CLASH
mirtarbase	MIMAT0000066	hsa-let-7e-5p	PDLIM5	10611	ENSG00000163110	PAR-CLIP
mirtarbase	MIMAT0000066	hsa-let-7e-5p	IGF2BP3	10643	ENSG00000136231	CLASH//PAR-CLIP
mirtarbase	MIMAT0000066	hsa-let-7e-5p	IGF2BP3	10643	ENSG00000136231	CLASH//PAR-CLIP
mirtarbase	MIMAT0000066	hsa-let-7e-5p	IGF2BP3	10643	ENSG00000136231	CLASH//PAR-CLIP
mirtarbase	MIMAT0000066	hsa-let-7e-5p	IGF2BP3	10643	ENSG00000136231	CLASH
mirtarbase	MIMAT0000066	hsa-let-7e-5p	IGF2BP3	10643	ENSG00000136231	PAR-CLIP
mirtarbase	MIMAT0000066	hsa-let-7e-5p	IGF2BP3	10643	ENSG00000136231	PAR-CLIP
mirtarbase	MIMAT0000066	hsa-let-7e-5p	CELF2	10659	ENSG00000048740	CLASH
mirtarbase	MIMAT0000066	hsa-let-7e-5p	CELF2	10659	ENSG00000048740	CLASH
mirtarbase	MIMAT0000066	hsa-let-7e-5p	WDR4	10785	ENSG00000160193	CLASH
mirtarbase	MIMAT0000066	hsa-let-7e-5p	WDR4	10785	ENSG00000160193	CLASH
mirtarbase	MIMAT0000066	hsa-let-7e-5p	ZNF460	10794	ENSG00000197714	PAR-CLIP
mirtarbase	MIMAT0000066	hsa-let-7e-5p	ZNF460	10794	ENSG00000197714	PAR-CLIP
mirtarbase	MIMAT0000066	hsa-let-7e-5p	ZNF460	10794	ENSG00000197714	PAR-CLIP
mirtarbase	MIMAT0000066	hsa-let-7e-5p	ZNF460	10794	ENSG00000197714	PAR-CLIP
mirtarbase	MIMAT0000066	hsa-let-7e-5p	PGRMC1	10857	ENSG00000101856	PAR-CLIP
mirtarbase	MIMAT0000066	hsa-let-7e-5p	PGRMC1	10857	ENSG00000101856	PAR-CLIP
mirtarbase	MIMAT0000066	hsa-let-7e-5p	SUB1	10923	ENSG00000113387	CLASH
mirtarbase	MIMAT0000066	hsa-let-7e-5p	SUB1	10923	ENSG00000113387	CLASH
mirtarbase	MIMAT0000066	hsa-let-7e-5p	YWHAQ	10971	ENSG00000134308	CLASH
mirtarbase	MIMAT0000066	hsa-let-7e-5p	YWHAQ	10971	ENSG00000134308	CLASH
mirtarbase	MIMAT0000066	hsa-let-7e-5p	HNRNPUL1	11100	ENSG00000105323	CLASH
mirtarbase	MIMAT0000066	hsa-let-7e-5p	HNRNPUL1	11100	ENSG00000105323	CLASH
mirtarbase	MIMAT0000066	hsa-let-7e-5p	SEC23IP	11196	ENSG00000107651	CLASH
mirtarbase	MIMAT0000066	hsa-let-7e-5p	SEC23IP	11196	ENSG00000107651	CLASH
mirtarbase	MIMAT0000066	hsa-let-7e-5p	CA5B	11238	ENSG00000169239	CLASH
mirtarbase	MIMAT0000066	hsa-let-7e-5p	CA5B	11238	ENSG00000169239	CLASH
mirtarbase	MIMAT0000066	hsa-let-7e-5p	ATXN2L	11273	ENSG00000168488	CLASH
mirtarbase	MIMAT0000066	hsa-let-7e-5p	ATXN2L	11273	ENSG00000168488	CLASH
mirtarbase	MIMAT0000066	hsa-let-7e-5p	COPG1	22820	ENSG00000181789	CLASH
mirtarbase	MIMAT0000066	hsa-let-7e-5p	COPG1	22820	ENSG00000181789	CLASH
mirtarbase	MIMAT0000066	hsa-let-7e-5p	ZNF652	22834	ENSG00000198740	CLASH
mirtarbase	MIMAT0000066	hsa-let-7e-5p	ZNF652	22834	ENSG00000198740	CLASH
mirtarbase	MIMAT0000066	hsa-let-7e-5p	RNF44	22838	ENSG00000146083	PAR-CLIP
mirtarbase	MIMAT0000066	hsa-let-7e-5p	RNF44	22838	ENSG00000146083	PAR-CLIP
mirtarbase	MIMAT0000066	hsa-let-7e-5p	RNF44	22838	ENSG00000146083	PAR-CLIP
mirtarbase	MIMAT0000066	hsa-let-7e-5p	RNF44	22838	ENSG00000146083	PAR-CLIP
mirtarbase	MIMAT0000066	hsa-let-7e-5p	RNF44	22838	ENSG00000146083	PAR-CLIP
mirtarbase	MIMAT0000066	hsa-let-7e-5p	RNF44	22838	ENSG00000146083	PAR-CLIP
mirtarbase	MIMAT0000066	hsa-let-7e-5p	FNDC3A	22862	ENSG00000102531	PAR-CLIP
mirtarbase	MIMAT0000066	hsa-let-7e-5p	FNDC3A	22862	ENSG00000102531	PAR-CLIP
mirtarbase	MIMAT0000066	hsa-let-7e-5p	DZIP1	22873	ENSG00000134874	CLASH
mirtarbase	MIMAT0000066	hsa-let-7e-5p	DZIP1	22873	ENSG00000134874	CLASH
mirtarbase	MIMAT0000066	hsa-let-7e-5p	SCMH1	22955	ENSG00000010803	CLASH
mirtarbase	MIMAT0000066	hsa-let-7e-5p	SCMH1	22955	ENSG00000010803	CLASH
mirtarbase	MIMAT0000066	hsa-let-7e-5p	PDCD11	22984	ENSG00000148843	CLASH
mirtarbase	MIMAT0000066	hsa-let-7e-5p	PDCD11	22984	ENSG00000148843	CLASH
mirtarbase	MIMAT0000066	hsa-let-7e-5p	DAAM1	23002	ENSG00000100592	CLASH
mirtarbase	MIMAT0000066	hsa-let-7e-5p	DAAM1	23002	ENSG00000100592	CLASH
mirtarbase	MIMAT0000066	hsa-let-7e-5p	ZNF609	23060	ENSG00000180357	PAR-CLIP
mirtarbase	MIMAT0000066	hsa-let-7e-5p	PLXND1	23129	ENSG00000004399	PAR-CLIP
mirtarbase	MIMAT0000066	hsa-let-7e-5p	PLXND1	23129	ENSG00000004399	PAR-CLIP
mirtarbase	MIMAT0000066	hsa-let-7e-5p	GGA3	23163	ENSG00000125447	PAR-CLIP
mirtarbase	MIMAT0000066	hsa-let-7e-5p	GGA3	23163	ENSG00000125447	PAR-CLIP
mirtarbase	MIMAT0000066	hsa-let-7e-5p	TTLL12	23170	ENSG00000100304	CLASH
mirtarbase	MIMAT0000066	hsa-let-7e-5p	TTLL12	23170	ENSG00000100304	CLASH
mirtarbase	MIMAT0000066	hsa-let-7e-5p	PSME4	23198	ENSG00000068878	CLASH
mirtarbase	MIMAT0000066	hsa-let-7e-5p	PSME4	23198	ENSG00000068878	CLASH
mirtarbase	MIMAT0000066	hsa-let-7e-5p	PMPCA	23203	ENSG00000165688	CLASH//PAR-CLIP
mirtarbase	MIMAT0000066	hsa-let-7e-5p	PMPCA	23203	ENSG00000165688	CLASH//PAR-CLIP
mirtarbase	MIMAT0000066	hsa-let-7e-5p	PMPCA	23203	ENSG00000165688	CLASH//PAR-CLIP
mirtarbase	MIMAT0000066	hsa-let-7e-5p	PMPCA	23203	ENSG00000165688	CLASH
mirtarbase	MIMAT0000066	hsa-let-7e-5p	PMPCA	23203	ENSG00000165688	PAR-CLIP
mirtarbase	MIMAT0000066	hsa-let-7e-5p	PMPCA	23203	ENSG00000165688	PAR-CLIP
mirtarbase	MIMAT0000066	hsa-let-7e-5p	PACS2	23241	ENSG00000179364	CLASH
mirtarbase	MIMAT0000066	hsa-let-7e-5p	PACS2	23241	ENSG00000179364	CLASH
mirtarbase	MIMAT0000066	hsa-let-7e-5p	RPRD2	23248	ENSG00000163125	CLASH
mirtarbase	MIMAT0000066	hsa-let-7e-5p	RPRD2	23248	ENSG00000163125	CLASH
mirtarbase	MIMAT0000066	hsa-let-7e-5p	KIAA0930	23313	ENSG00000100364	PAR-CLIP
mirtarbase	MIMAT0000066	hsa-let-7e-5p	KIAA0930	23313	ENSG00000100364	PAR-CLIP
mirtarbase	MIMAT0000066	hsa-let-7e-5p	AHCYL2	23382	ENSG00000158467	PAR-CLIP
mirtarbase	MIMAT0000066	hsa-let-7e-5p	AHCYL2	23382	ENSG00000158467	PAR-CLIP
mirtarbase	MIMAT0000066	hsa-let-7e-5p	MED13L	23389	ENSG00000123066	CLASH
mirtarbase	MIMAT0000066	hsa-let-7e-5p	MED13L	23389	ENSG00000123066	CLASH
mirtarbase	MIMAT0000066	hsa-let-7e-5p	TDRD7	23424	ENSG00000196116	CLASH
mirtarbase	MIMAT0000066	hsa-let-7e-5p	TDRD7	23424	ENSG00000196116	CLASH
mirtarbase	MIMAT0000066	hsa-let-7e-5p	CBX5	23468	ENSG00000094916	CLASH//PAR-CLIP
mirtarbase	MIMAT0000066	hsa-let-7e-5p	CBX5	23468	ENSG00000094916	CLASH//PAR-CLIP
mirtarbase	MIMAT0000066	hsa-let-7e-5p	CBX5	23468	ENSG00000094916	CLASH
mirtarbase	MIMAT0000066	hsa-let-7e-5p	CBX5	23468	ENSG00000094916	PAR-CLIP
mirtarbase	MIMAT0000066	hsa-let-7e-5p	PHF3	23469	ENSG00000118482	CLASH
mirtarbase	MIMAT0000066	hsa-let-7e-5p	PHF3	23469	ENSG00000118482	CLASH
mirtarbase	MIMAT0000066	hsa-let-7e-5p	PES1	23481	ENSG00000100029	CLASH
mirtarbase	MIMAT0000066	hsa-let-7e-5p	PES1	23481	ENSG00000100029	CLASH
mirtarbase	MIMAT0000066	hsa-let-7e-5p	MACF1	23499	ENSG00000127603	CLASH
mirtarbase	MIMAT0000066	hsa-let-7e-5p	MACF1	23499	ENSG00000127603	CLASH
mirtarbase	MIMAT0000066	hsa-let-7e-5p	SUZ12	23512	ENSG00000178691	CLASH
mirtarbase	MIMAT0000066	hsa-let-7e-5p	SUZ12	23512	ENSG00000178691	CLASH
mirtarbase	MIMAT0000066	hsa-let-7e-5p	RBFOX2	23543	ENSG00000100320	PAR-CLIP
mirtarbase	MIMAT0000066	hsa-let-7e-5p	RBFOX2	23543	ENSG00000100320	PAR-CLIP
mirtarbase	MIMAT0000066	hsa-let-7e-5p	RBFOX2	23543	ENSG00000100320	PAR-CLIP
mirtarbase	MIMAT0000066	hsa-let-7e-5p	RBFOX2	23543	ENSG00000100320	PAR-CLIP
mirtarbase	MIMAT0000066	hsa-let-7e-5p	RBFOX2	23543	ENSG00000100320	PAR-CLIP
mirtarbase	MIMAT0000066	hsa-let-7e-5p	RBFOX2	23543	ENSG00000100320	PAR-CLIP
mirtarbase	MIMAT0000066	hsa-let-7e-5p	RBFOX2	23543	ENSG00000100320	PAR-CLIP
mirtarbase	MIMAT0000066	hsa-let-7e-5p	RBFOX2	23543	ENSG00000100320	PAR-CLIP
mirtarbase	MIMAT0000066	hsa-let-7e-5p	RBFOX2	23543	ENSG00000100320	PAR-CLIP
mirtarbase	MIMAT0000066	hsa-let-7e-5p	RBFOX2	23543	ENSG00000100320	PAR-CLIP
mirtarbase	MIMAT0000066	hsa-let-7e-5p	PIGN	23556	ENSG00000197563	CLASH
mirtarbase	MIMAT0000066	hsa-let-7e-5p	PIGN	23556	ENSG00000197563	CLASH
mirtarbase	MIMAT0000066	hsa-let-7e-5p	PLD3	23646	ENSG00000105223	PAR-CLIP
mirtarbase	MIMAT0000066	hsa-let-7e-5p	INTS7	25896	ENSG00000143493	HITS-CLIP
mirtarbase	MIMAT0000066	hsa-let-7e-5p	INTS7	25896	ENSG00000143493	HITS-CLIP
mirtarbase	MIMAT0000066	hsa-let-7e-5p	ZNF451	26036	ENSG00000112200	CLASH
mirtarbase	MIMAT0000066	hsa-let-7e-5p	ZNF451	26036	ENSG00000112200	CLASH
mirtarbase	MIMAT0000066	hsa-let-7e-5p	APPL1	26060	ENSG00000157500	CLASH
mirtarbase	MIMAT0000066	hsa-let-7e-5p	APPL1	26060	ENSG00000157500	CLASH
mirtarbase	MIMAT0000066	hsa-let-7e-5p	CHTOP	26097	ENSG00000160679	HITS-CLIP
mirtarbase	MIMAT0000066	hsa-let-7e-5p	CHTOP	26097	ENSG00000160679	HITS-CLIP
mirtarbase	MIMAT0000066	hsa-let-7e-5p	RSL1D1	26156	ENSG00000171490	CLASH
mirtarbase	MIMAT0000066	hsa-let-7e-5p	RSL1D1	26156	ENSG00000171490	CLASH
mirtarbase	MIMAT0000066	hsa-let-7e-5p	FBXW2	26190	ENSG00000119402	PAR-CLIP
mirtarbase	MIMAT0000066	hsa-let-7e-5p	FBXW2	26190	ENSG00000119402	PAR-CLIP
mirtarbase	MIMAT0000066	hsa-let-7e-5p	FBXW2	26190	ENSG00000119402	PAR-CLIP
mirtarbase	MIMAT0000066	hsa-let-7e-5p	FBXW2	26190	ENSG00000119402	PAR-CLIP
mirtarbase	MIMAT0000066	hsa-let-7e-5p	DISC1	27185	ENSG00000162946	PAR-CLIP
mirtarbase	MIMAT0000066	hsa-let-7e-5p	DISC1	27185	ENSG00000162946	PAR-CLIP
mirtarbase	MIMAT0000066	hsa-let-7e-5p	DISC1	27185	ENSG00000162946	PAR-CLIP
mirtarbase	MIMAT0000066	hsa-let-7e-5p	DISC1	27185	ENSG00000162946	PAR-CLIP
mirtarbase	MIMAT0000066	hsa-let-7e-5p	DISC1	27185	ENSG00000162946	PAR-CLIP
mirtarbase	MIMAT0000066	hsa-let-7e-5p	DISC1	27185	ENSG00000162946	PAR-CLIP
mirtarbase	MIMAT0000066	hsa-let-7e-5p	SGSM3	27352	ENSG00000100359	CLASH
mirtarbase	MIMAT0000066	hsa-let-7e-5p	SGSM3	27352	ENSG00000100359	CLASH
mirtarbase	MIMAT0000066	hsa-let-7e-5p	SLCO4A1	28231	ENSG00000101187	CLASH
mirtarbase	MIMAT0000066	hsa-let-7e-5p	SLCO4A1	28231	ENSG00000101187	CLASH
mirtarbase	MIMAT0000066	hsa-let-7e-5p	SLCO3A1	28232	ENSG00000176463	CLASH
mirtarbase	MIMAT0000066	hsa-let-7e-5p	SLCO3A1	28232	ENSG00000176463	CLASH
mirtarbase	MIMAT0000066	hsa-let-7e-5p	C19orf53	28974	ENSG00000104979	PAR-CLIP
mirtarbase	MIMAT0000066	hsa-let-7e-5p	C19orf53	28974	ENSG00000104979	PAR-CLIP
mirtarbase	MIMAT0000066	hsa-let-7e-5p	C19orf53	28974	ENSG00000104979	PAR-CLIP
mirtarbase	MIMAT0000066	hsa-let-7e-5p	C19orf53	28974	ENSG00000104979	PAR-CLIP
mirtarbase	MIMAT0000066	hsa-let-7e-5p	CCDC113	29070	ENSG00000103021	CLASH
mirtarbase	MIMAT0000066	hsa-let-7e-5p	CCDC113	29070	ENSG00000103021	CLASH
mirtarbase	MIMAT0000066	hsa-let-7e-5p	RACGAP1	29127	ENSG00000161800	CLASH
mirtarbase	MIMAT0000066	hsa-let-7e-5p	RACGAP1	29127	ENSG00000161800	CLASH
mirtarbase	MIMAT0000066	hsa-let-7e-5p	DCAF8	50717	ENSG00000132716	CLASH
mirtarbase	MIMAT0000066	hsa-let-7e-5p	DCAF8	50717	ENSG00000132716	CLASH
mirtarbase	MIMAT0000066	hsa-let-7e-5p	SHANK1	50944	ENSG00000161681	CLASH
mirtarbase	MIMAT0000066	hsa-let-7e-5p	SHANK1	50944	ENSG00000161681	CLASH
mirtarbase	MIMAT0000066	hsa-let-7e-5p	TMED5	50999	ENSG00000117500	PAR-CLIP//HITS-CLIP
mirtarbase	MIMAT0000066	hsa-let-7e-5p	TMED5	50999	ENSG00000117500	PAR-CLIP//HITS-CLIP
mirtarbase	MIMAT0000066	hsa-let-7e-5p	TMED5	50999	ENSG00000117500	PAR-CLIP
mirtarbase	MIMAT0000066	hsa-let-7e-5p	TMED5	50999	ENSG00000117500	HITS-CLIP
mirtarbase	MIMAT0000066	hsa-let-7e-5p	MRPS2	51116	ENSG00000122140	CLASH
mirtarbase	MIMAT0000066	hsa-let-7e-5p	MRPS2	51116	ENSG00000122140	CLASH
mirtarbase	MIMAT0000066	hsa-let-7e-5p	NAA20	51126	ENSG00000173418	PAR-CLIP
mirtarbase	MIMAT0000066	hsa-let-7e-5p	NAA20	51126	ENSG00000173418	PAR-CLIP
mirtarbase	MIMAT0000066	hsa-let-7e-5p	RNFT1	51136	ENSG00000189050	PAR-CLIP
mirtarbase	MIMAT0000066	hsa-let-7e-5p	RNFT1	51136	ENSG00000189050	PAR-CLIP
mirtarbase	MIMAT0000066	hsa-let-7e-5p	CPA4	51200	ENSG00000128510	HITS-CLIP
mirtarbase	MIMAT0000066	hsa-let-7e-5p	CPA4	51200	ENSG00000128510	HITS-CLIP
mirtarbase	MIMAT0000066	hsa-let-7e-5p	THEM6	51337	ENSG00000130193	PAR-CLIP
mirtarbase	MIMAT0000066	hsa-let-7e-5p	THEM6	51337	ENSG00000130193	PAR-CLIP
mirtarbase	MIMAT0000066	hsa-let-7e-5p	THEM6	51337	ENSG00000130193	PAR-CLIP
mirtarbase	MIMAT0000066	hsa-let-7e-5p	THEM6	51337	ENSG00000130193	PAR-CLIP
mirtarbase	MIMAT0000066	hsa-let-7e-5p	NCKIPSD	51517	ENSG00000213672	CLASH//PAR-CLIP//HITS-CLIP
mirtarbase	MIMAT0000066	hsa-let-7e-5p	NCKIPSD	51517	ENSG00000213672	CLASH//PAR-CLIP//HITS-CLIP
mirtarbase	MIMAT0000066	hsa-let-7e-5p	NCKIPSD	51517	ENSG00000213672	CLASH//PAR-CLIP//HITS-CLIP
mirtarbase	MIMAT0000066	hsa-let-7e-5p	NCKIPSD	51517	ENSG00000213672	CLASH
mirtarbase	MIMAT0000066	hsa-let-7e-5p	NCKIPSD	51517	ENSG00000213672	PAR-CLIP
mirtarbase	MIMAT0000066	hsa-let-7e-5p	NCKIPSD	51517	ENSG00000213672	HITS-CLIP
mirtarbase	MIMAT0000066	hsa-let-7e-5p	SLC38A2	54407	ENSG00000134294	CLASH
mirtarbase	MIMAT0000066	hsa-let-7e-5p	SLC38A2	54407	ENSG00000134294	CLASH
mirtarbase	MIMAT0000066	hsa-let-7e-5p	CDKAL1	54901	ENSG00000145996	CLASH//HITS-CLIP
mirtarbase	MIMAT0000066	hsa-let-7e-5p	CDKAL1	54901	ENSG00000145996	CLASH//HITS-CLIP
mirtarbase	MIMAT0000066	hsa-let-7e-5p	CDKAL1	54901	ENSG00000145996	CLASH
mirtarbase	MIMAT0000066	hsa-let-7e-5p	CDKAL1	54901	ENSG00000145996	HITS-CLIP
mirtarbase	MIMAT0000066	hsa-let-7e-5p	SEMA4C	54910	ENSG00000168758	PAR-CLIP
mirtarbase	MIMAT0000066	hsa-let-7e-5p	SEMA4C	54910	ENSG00000168758	PAR-CLIP
mirtarbase	MIMAT0000066	hsa-let-7e-5p	SEMA4C	54910	ENSG00000168758	PAR-CLIP
mirtarbase	MIMAT0000066	hsa-let-7e-5p	SEMA4C	54910	ENSG00000168758	PAR-CLIP
mirtarbase	MIMAT0000066	hsa-let-7e-5p	SEMA4C	54910	ENSG00000168758	PAR-CLIP
mirtarbase	MIMAT0000066	hsa-let-7e-5p	SEMA4C	54910	ENSG00000168758	PAR-CLIP
mirtarbase	MIMAT0000066	hsa-let-7e-5p	ZNF770	54989	ENSG00000198146	CLASH
mirtarbase	MIMAT0000066	hsa-let-7e-5p	ZNF770	54989	ENSG00000198146	CLASH
mirtarbase	MIMAT0000066	hsa-let-7e-5p	USP47	55031	ENSG00000170242	PAR-CLIP
mirtarbase	MIMAT0000066	hsa-let-7e-5p	BSDC1	55108	ENSG00000160058	CLASH
mirtarbase	MIMAT0000066	hsa-let-7e-5p	BSDC1	55108	ENSG00000160058	CLASH
mirtarbase	MIMAT0000066	hsa-let-7e-5p	FIGN	55137	ENSG00000182263	PAR-CLIP//HITS-CLIP
mirtarbase	MIMAT0000066	hsa-let-7e-5p	FIGN	55137	ENSG00000182263	PAR-CLIP//HITS-CLIP
mirtarbase	MIMAT0000066	hsa-let-7e-5p	FIGN	55137	ENSG00000182263	PAR-CLIP//HITS-CLIP
mirtarbase	MIMAT0000066	hsa-let-7e-5p	FIGN	55137	ENSG00000182263	PAR-CLIP//HITS-CLIP
mirtarbase	MIMAT0000066	hsa-let-7e-5p	FIGN	55137	ENSG00000182263	PAR-CLIP
mirtarbase	MIMAT0000066	hsa-let-7e-5p	FIGN	55137	ENSG00000182263	PAR-CLIP
mirtarbase	MIMAT0000066	hsa-let-7e-5p	FIGN	55137	ENSG00000182263	PAR-CLIP
mirtarbase	MIMAT0000066	hsa-let-7e-5p	FIGN	55137	ENSG00000182263	HITS-CLIP
mirtarbase	MIMAT0000066	hsa-let-7e-5p	VPS13D	55187	ENSG00000048707	CLASH
mirtarbase	MIMAT0000066	hsa-let-7e-5p	VPS13D	55187	ENSG00000048707	CLASH
mirtarbase	MIMAT0000066	hsa-let-7e-5p	ARL8B	55207	ENSG00000134108	HITS-CLIP
mirtarbase	MIMAT0000066	hsa-let-7e-5p	ARL8B	55207	ENSG00000134108	HITS-CLIP
mirtarbase	MIMAT0000066	hsa-let-7e-5p	LRRC20	55222	ENSG00000172731	PAR-CLIP
mirtarbase	MIMAT0000066	hsa-let-7e-5p	LRRC20	55222	ENSG00000172731	PAR-CLIP
mirtarbase	MIMAT0000066	hsa-let-7e-5p	NUDT15	55270	ENSG00000136159	CLASH
mirtarbase	MIMAT0000066	hsa-let-7e-5p	NUDT15	55270	ENSG00000136159	CLASH
mirtarbase	MIMAT0000066	hsa-let-7e-5p	SYNJ2BP	55333	ENSG00000213463	PAR-CLIP
mirtarbase	MIMAT0000066	hsa-let-7e-5p	SYNJ2BP	55333	ENSG00000213463	PAR-CLIP
mirtarbase	MIMAT0000066	hsa-let-7e-5p	SYNJ2BP	55333	ENSG00000213463	PAR-CLIP
mirtarbase	MIMAT0000066	hsa-let-7e-5p	SYNJ2BP	55333	ENSG00000213463	PAR-CLIP
mirtarbase	MIMAT0000066	hsa-let-7e-5p	YOD1	55432	ENSG00000180667	PAR-CLIP
mirtarbase	MIMAT0000066	hsa-let-7e-5p	YOD1	55432	ENSG00000180667	PAR-CLIP
mirtarbase	MIMAT0000066	hsa-let-7e-5p	YOD1	55432	ENSG00000180667	PAR-CLIP
mirtarbase	MIMAT0000066	hsa-let-7e-5p	YOD1	55432	ENSG00000180667	PAR-CLIP
mirtarbase	MIMAT0000066	hsa-let-7e-5p	YOD1	55432	ENSG00000180667	PAR-CLIP
mirtarbase	MIMAT0000066	hsa-let-7e-5p	YOD1	55432	ENSG00000180667	PAR-CLIP
mirtarbase	MIMAT0000066	hsa-let-7e-5p	CDV3	55573	ENSG00000091527	PAR-CLIP
mirtarbase	MIMAT0000066	hsa-let-7e-5p	CDV3	55573	ENSG00000091527	PAR-CLIP
mirtarbase	MIMAT0000066	hsa-let-7e-5p	KIF27	55582	ENSG00000165115	PAR-CLIP
mirtarbase	MIMAT0000066	hsa-let-7e-5p	KIF27	55582	ENSG00000165115	PAR-CLIP
mirtarbase	MIMAT0000066	hsa-let-7e-5p	CHD7	55636	ENSG00000171316	CLASH
mirtarbase	MIMAT0000066	hsa-let-7e-5p	CHD7	55636	ENSG00000171316	CLASH
mirtarbase	MIMAT0000066	hsa-let-7e-5p	HIF1AN	55662	ENSG00000166135	CLASH
mirtarbase	MIMAT0000066	hsa-let-7e-5p	HIF1AN	55662	ENSG00000166135	CLASH
mirtarbase	MIMAT0000066	hsa-let-7e-5p	IPO9	55705	ENSG00000198700	HITS-CLIP
mirtarbase	MIMAT0000066	hsa-let-7e-5p	IPO9	55705	ENSG00000198700	HITS-CLIP
mirtarbase	MIMAT0000066	hsa-let-7e-5p	TXLNG	55787	ENSG00000086712	PAR-CLIP
mirtarbase	MIMAT0000066	hsa-let-7e-5p	TXLNG	55787	ENSG00000086712	PAR-CLIP
mirtarbase	MIMAT0000066	hsa-let-7e-5p	USE1	55850	ENSG00000053501	CLASH
mirtarbase	MIMAT0000066	hsa-let-7e-5p	USE1	55850	ENSG00000053501	CLASH
mirtarbase	MIMAT0000066	hsa-let-7e-5p	LRRC8A	56262	ENSG00000136802	CLASH
mirtarbase	MIMAT0000066	hsa-let-7e-5p	LRRC8A	56262	ENSG00000136802	CLASH
mirtarbase	MIMAT0000066	hsa-let-7e-5p	DIABLO	56616	ENSG00000184047	PAR-CLIP
mirtarbase	MIMAT0000066	hsa-let-7e-5p	DIABLO	56616	ENSG00000184047	PAR-CLIP
mirtarbase	MIMAT0000066	hsa-let-7e-5p	DIABLO	56616	ENSG00000184047	PAR-CLIP
mirtarbase	MIMAT0000066	hsa-let-7e-5p	DIABLO	56616	ENSG00000184047	PAR-CLIP
mirtarbase	MIMAT0000066	hsa-let-7e-5p	SAR1A	56681	ENSG00000079332	HITS-CLIP
mirtarbase	MIMAT0000066	hsa-let-7e-5p	SAR1A	56681	ENSG00000079332	HITS-CLIP
mirtarbase	MIMAT0000066	hsa-let-7e-5p	UGGT1	56886	ENSG00000136731	CLASH
mirtarbase	MIMAT0000066	hsa-let-7e-5p	UGGT1	56886	ENSG00000136731	CLASH
mirtarbase	MIMAT0000066	hsa-let-7e-5p	STARD7	56910	ENSG00000084090	CLASH
mirtarbase	MIMAT0000066	hsa-let-7e-5p	STARD7	56910	ENSG00000084090	CLASH
mirtarbase	MIMAT0000066	hsa-let-7e-5p	SMARCAD1	56916	ENSG00000163104	PAR-CLIP
mirtarbase	MIMAT0000066	hsa-let-7e-5p	SMARCAD1	56916	ENSG00000163104	PAR-CLIP
mirtarbase	MIMAT0000066	hsa-let-7e-5p	SMARCAD1	56916	ENSG00000163104	PAR-CLIP
mirtarbase	MIMAT0000066	hsa-let-7e-5p	SMARCAD1	56916	ENSG00000163104	PAR-CLIP
mirtarbase	MIMAT0000066	hsa-let-7e-5p	ATXN7L3	56970	ENSG00000087152	PAR-CLIP
mirtarbase	MIMAT0000066	hsa-let-7e-5p	ATXN7L3	56970	ENSG00000087152	PAR-CLIP
mirtarbase	MIMAT0000066	hsa-let-7e-5p	C12orf4	57102	ENSG00000047621	PAR-CLIP
mirtarbase	MIMAT0000066	hsa-let-7e-5p	C12orf4	57102	ENSG00000047621	PAR-CLIP
mirtarbase	MIMAT0000066	hsa-let-7e-5p	FAM219B	57184	ENSG00000178761	CLASH
mirtarbase	MIMAT0000066	hsa-let-7e-5p	FAM219B	57184	ENSG00000178761	CLASH
mirtarbase	MIMAT0000066	hsa-let-7e-5p	SCYL1	57410	ENSG00000142186	CLASH
mirtarbase	MIMAT0000066	hsa-let-7e-5p	SCYL1	57410	ENSG00000142186	CLASH
mirtarbase	MIMAT0000066	hsa-let-7e-5p	MTUS1	57509	ENSG00000129422	PAR-CLIP
mirtarbase	MIMAT0000066	hsa-let-7e-5p	MTUS1	57509	ENSG00000129422	PAR-CLIP
mirtarbase	MIMAT0000066	hsa-let-7e-5p	MTUS1	57509	ENSG00000129422	PAR-CLIP
mirtarbase	MIMAT0000066	hsa-let-7e-5p	MTUS1	57509	ENSG00000129422	PAR-CLIP
mirtarbase	MIMAT0000066	hsa-let-7e-5p	MTUS1	57509	ENSG00000129422	PAR-CLIP
mirtarbase	MIMAT0000066	hsa-let-7e-5p	MTUS1	57509	ENSG00000129422	PAR-CLIP
mirtarbase	MIMAT0000066	hsa-let-7e-5p	MTUS1	57509	ENSG00000129422	PAR-CLIP
mirtarbase	MIMAT0000066	hsa-let-7e-5p	MTUS1	57509	ENSG00000129422	PAR-CLIP
mirtarbase	MIMAT0000066	hsa-let-7e-5p	KIAA1328	57536	ENSG00000150477	HITS-CLIP
mirtarbase	MIMAT0000066	hsa-let-7e-5p	KIAA1328	57536	ENSG00000150477	HITS-CLIP
mirtarbase	MIMAT0000066	hsa-let-7e-5p	USP37	57695	ENSG00000135913	CLASH
mirtarbase	MIMAT0000066	hsa-let-7e-5p	USP37	57695	ENSG00000135913	CLASH
mirtarbase	MIMAT0000066	hsa-let-7e-5p	NCKAP5L	57701	ENSG00000167566	CLASH
mirtarbase	MIMAT0000066	hsa-let-7e-5p	NCKAP5L	57701	ENSG00000167566	CLASH
mirtarbase	MIMAT0000066	hsa-let-7e-5p	IGDCC4	57722	ENSG00000103742	PAR-CLIP
mirtarbase	MIMAT0000066	hsa-let-7e-5p	IGDCC4	57722	ENSG00000103742	PAR-CLIP
mirtarbase	MIMAT0000066	hsa-let-7e-5p	IGDCC4	57722	ENSG00000103742	PAR-CLIP
mirtarbase	MIMAT0000066	hsa-let-7e-5p	IGDCC4	57722	ENSG00000103742	PAR-CLIP
mirtarbase	MIMAT0000066	hsa-let-7e-5p	IGDCC4	57722	ENSG00000103742	PAR-CLIP
mirtarbase	MIMAT0000066	hsa-let-7e-5p	IGDCC4	57722	ENSG00000103742	PAR-CLIP
mirtarbase	MIMAT0000066	hsa-let-7e-5p	IGDCC4	57722	ENSG00000103742	PAR-CLIP
mirtarbase	MIMAT0000066	hsa-let-7e-5p	IGDCC4	57722	ENSG00000103742	PAR-CLIP
mirtarbase	MIMAT0000066	hsa-let-7e-5p	ABHD17C	58489	ENSG00000136379	PAR-CLIP
mirtarbase	MIMAT0000066	hsa-let-7e-5p	ABHD17C	58489	ENSG00000136379	PAR-CLIP
mirtarbase	MIMAT0000066	hsa-let-7e-5p	SPCS3	60559	ENSG00000129128	CLASH
mirtarbase	MIMAT0000066	hsa-let-7e-5p	SPCS3	60559	ENSG00000129128	CLASH
mirtarbase	MIMAT0000066	hsa-let-7e-5p	RRAGC	64121	ENSG00000116954	CLASH
mirtarbase	MIMAT0000066	hsa-let-7e-5p	RRAGC	64121	ENSG00000116954	CLASH
mirtarbase	MIMAT0000066	hsa-let-7e-5p	MTMR14	64419	ENSG00000163719	CLASH
mirtarbase	MIMAT0000066	hsa-let-7e-5p	MTMR14	64419	ENSG00000163719	CLASH
mirtarbase	MIMAT0000066	hsa-let-7e-5p	RMND5A	64795	ENSG00000153561	CLASH
mirtarbase	MIMAT0000066	hsa-let-7e-5p	RMND5A	64795	ENSG00000153561	CLASH
mirtarbase	MIMAT0000066	hsa-let-7e-5p	NT5DC2	64943	ENSG00000168268	CLASH
mirtarbase	MIMAT0000066	hsa-let-7e-5p	NT5DC2	64943	ENSG00000168268	CLASH
mirtarbase	MIMAT0000066	hsa-let-7e-5p	MARCKSL1	65108	ENSG00000175130	PAR-CLIP
mirtarbase	MIMAT0000066	hsa-let-7e-5p	PLEKHA3	65977	ENSG00000116095	PAR-CLIP
mirtarbase	MIMAT0000066	hsa-let-7e-5p	PLEKHA3	65977	ENSG00000116095	PAR-CLIP
mirtarbase	MIMAT0000066	hsa-let-7e-5p	PHACTR4	65979	ENSG00000204138	HITS-CLIP
mirtarbase	MIMAT0000066	hsa-let-7e-5p	PHACTR4	65979	ENSG00000204138	HITS-CLIP
mirtarbase	MIMAT0000066	hsa-let-7e-5p	SLC2A11	66035	ENSG00000133460	CLASH
mirtarbase	MIMAT0000066	hsa-let-7e-5p	SLC2A11	66035	ENSG00000133460	CLASH
mirtarbase	MIMAT0000066	hsa-let-7e-5p	ATG9A	79065	ENSG00000198925	PAR-CLIP
mirtarbase	MIMAT0000066	hsa-let-7e-5p	ATG9A	79065	ENSG00000198925	PAR-CLIP
mirtarbase	MIMAT0000066	hsa-let-7e-5p	ATG9A	79065	ENSG00000198925	PAR-CLIP
mirtarbase	MIMAT0000066	hsa-let-7e-5p	ATG9A	79065	ENSG00000198925	PAR-CLIP
mirtarbase	MIMAT0000066	hsa-let-7e-5p	ATG9A	79065	ENSG00000198925	PAR-CLIP
mirtarbase	MIMAT0000066	hsa-let-7e-5p	ATG9A	79065	ENSG00000198925	PAR-CLIP
mirtarbase	MIMAT0000066	hsa-let-7e-5p	RNF26	79102	ENSG00000173456	CLASH
mirtarbase	MIMAT0000066	hsa-let-7e-5p	RNF26	79102	ENSG00000173456	CLASH
mirtarbase	MIMAT0000066	hsa-let-7e-5p	EFHD2	79180	ENSG00000142634	PAR-CLIP
mirtarbase	MIMAT0000066	hsa-let-7e-5p	EFHD2	79180	ENSG00000142634	PAR-CLIP
mirtarbase	MIMAT0000066	hsa-let-7e-5p	RHBDF2	79651	ENSG00000129667	PAR-CLIP
mirtarbase	MIMAT0000066	hsa-let-7e-5p	LIN28A	79727	ENSG00000131914	Luciferase reporter assay//Microarray//qRT-PCR//Western blot
mirtarbase	MIMAT0000066	hsa-let-7e-5p	LIN28A	79727	ENSG00000131914	Luciferase reporter assay//Microarray//qRT-PCR//Western blot
mirtarbase	MIMAT0000066	hsa-let-7e-5p	AGMAT	79814	ENSG00000116771	CLASH
mirtarbase	MIMAT0000066	hsa-let-7e-5p	AGMAT	79814	ENSG00000116771	CLASH
mirtarbase	MIMAT0000066	hsa-let-7e-5p	NRSN2	80023	ENSG00000125841	CLASH
mirtarbase	MIMAT0000066	hsa-let-7e-5p	NRSN2	80023	ENSG00000125841	CLASH
mirtarbase	MIMAT0000066	hsa-let-7e-5p	ZNF556	80032	ENSG00000172000	HITS-CLIP
mirtarbase	MIMAT0000066	hsa-let-7e-5p	ZNF556	80032	ENSG00000172000	HITS-CLIP
mirtarbase	MIMAT0000066	hsa-let-7e-5p	CHD9	80205	ENSG00000177200	CLASH
mirtarbase	MIMAT0000066	hsa-let-7e-5p	CHD9	80205	ENSG00000177200	CLASH
mirtarbase	MIMAT0000066	hsa-let-7e-5p	EDEM3	80267	ENSG00000116406	HITS-CLIP
mirtarbase	MIMAT0000066	hsa-let-7e-5p	EDEM3	80267	ENSG00000116406	HITS-CLIP
mirtarbase	MIMAT0000066	hsa-let-7e-5p	SLC19A3	80704	ENSG00000135917	HITS-CLIP
mirtarbase	MIMAT0000066	hsa-let-7e-5p	SLC19A3	80704	ENSG00000135917	HITS-CLIP
mirtarbase	MIMAT0000066	hsa-let-7e-5p	LIMD2	80774	ENSG00000136490	PAR-CLIP
mirtarbase	MIMAT0000066	hsa-let-7e-5p	LIMD2	80774	ENSG00000136490	PAR-CLIP
mirtarbase	MIMAT0000066	hsa-let-7e-5p	COLEC12	81035	ENSG00000158270	PAR-CLIP
mirtarbase	MIMAT0000066	hsa-let-7e-5p	COLEC12	81035	ENSG00000158270	PAR-CLIP
mirtarbase	MIMAT0000066	hsa-let-7e-5p	C1orf21	81563	ENSG00000116667	PAR-CLIP
mirtarbase	MIMAT0000066	hsa-let-7e-5p	C1orf21	81563	ENSG00000116667	PAR-CLIP
mirtarbase	MIMAT0000066	hsa-let-7e-5p	ZNF611	81856	ENSG00000213020	PAR-CLIP//HITS-CLIP
mirtarbase	MIMAT0000066	hsa-let-7e-5p	ZNF611	81856	ENSG00000213020	PAR-CLIP//HITS-CLIP
mirtarbase	MIMAT0000066	hsa-let-7e-5p	ZNF611	81856	ENSG00000213020	PAR-CLIP//HITS-CLIP
mirtarbase	MIMAT0000066	hsa-let-7e-5p	ZNF611	81856	ENSG00000213020	PAR-CLIP
mirtarbase	MIMAT0000066	hsa-let-7e-5p	ZNF611	81856	ENSG00000213020	PAR-CLIP
mirtarbase	MIMAT0000066	hsa-let-7e-5p	ZNF611	81856	ENSG00000213020	HITS-CLIP
mirtarbase	MIMAT0000066	hsa-let-7e-5p	CDCA3	83461	ENSG00000111665	CLASH
mirtarbase	MIMAT0000066	hsa-let-7e-5p	CDCA3	83461	ENSG00000111665	CLASH
mirtarbase	MIMAT0000066	hsa-let-7e-5p	DNAL1	83544	ENSG00000119661	PAR-CLIP
mirtarbase	MIMAT0000066	hsa-let-7e-5p	DNAL1	83544	ENSG00000119661	PAR-CLIP
mirtarbase	MIMAT0000066	hsa-let-7e-5p	DNAL1	83544	ENSG00000119661	PAR-CLIP
mirtarbase	MIMAT0000066	hsa-let-7e-5p	DNAL1	83544	ENSG00000119661	PAR-CLIP
mirtarbase	MIMAT0000066	hsa-let-7e-5p	KREMEN1	83999	ENSG00000183762	PAR-CLIP
mirtarbase	MIMAT0000066	hsa-let-7e-5p	KREMEN1	83999	ENSG00000183762	PAR-CLIP
mirtarbase	MIMAT0000066	hsa-let-7e-5p	KREMEN1	83999	ENSG00000183762	PAR-CLIP
mirtarbase	MIMAT0000066	hsa-let-7e-5p	KREMEN1	83999	ENSG00000183762	PAR-CLIP
mirtarbase	MIMAT0000066	hsa-let-7e-5p	KATNAL1	84056	ENSG00000102781	CLASH
mirtarbase	MIMAT0000066	hsa-let-7e-5p	KATNAL1	84056	ENSG00000102781	CLASH
mirtarbase	MIMAT0000066	hsa-let-7e-5p	SLC10A7	84068	ENSG00000120519	PAR-CLIP
mirtarbase	MIMAT0000066	hsa-let-7e-5p	SLC10A7	84068	ENSG00000120519	PAR-CLIP
mirtarbase	MIMAT0000066	hsa-let-7e-5p	SLC10A7	84068	ENSG00000120519	PAR-CLIP
mirtarbase	MIMAT0000066	hsa-let-7e-5p	SLC10A7	84068	ENSG00000120519	PAR-CLIP
mirtarbase	MIMAT0000066	hsa-let-7e-5p	SLC10A7	84068	ENSG00000120519	PAR-CLIP
mirtarbase	MIMAT0000066	hsa-let-7e-5p	SLC10A7	84068	ENSG00000120519	PAR-CLIP
mirtarbase	MIMAT0000066	hsa-let-7e-5p	UTP15	84135	ENSG00000164338	CLASH
mirtarbase	MIMAT0000066	hsa-let-7e-5p	UTP15	84135	ENSG00000164338	CLASH
mirtarbase	MIMAT0000066	hsa-let-7e-5p	ZNF644	84146	ENSG00000122482	PAR-CLIP
mirtarbase	MIMAT0000066	hsa-let-7e-5p	ZNF644	84146	ENSG00000122482	PAR-CLIP
mirtarbase	MIMAT0000066	hsa-let-7e-5p	USP38	84640	ENSG00000170185	PAR-CLIP
mirtarbase	MIMAT0000066	hsa-let-7e-5p	USP38	84640	ENSG00000170185	PAR-CLIP
mirtarbase	MIMAT0000066	hsa-let-7e-5p	FUT10	84750	ENSG00000172728	PAR-CLIP
mirtarbase	MIMAT0000066	hsa-let-7e-5p	FUT10	84750	ENSG00000172728	PAR-CLIP
mirtarbase	MIMAT0000066	hsa-let-7e-5p	FUT10	84750	ENSG00000172728	PAR-CLIP
mirtarbase	MIMAT0000066	hsa-let-7e-5p	FUT10	84750	ENSG00000172728	PAR-CLIP
mirtarbase	MIMAT0000066	hsa-let-7e-5p	ZNF587	84914	ENSG00000198466	PAR-CLIP
mirtarbase	MIMAT0000066	hsa-let-7e-5p	ZNF587	84914	ENSG00000198466	PAR-CLIP
mirtarbase	MIMAT0000066	hsa-let-7e-5p	PPP1R15B	84919	ENSG00000158615	PAR-CLIP
mirtarbase	MIMAT0000066	hsa-let-7e-5p	PPP1R15B	84919	ENSG00000158615	PAR-CLIP
mirtarbase	MIMAT0000066	hsa-let-7e-5p	PPP1R15B	84919	ENSG00000158615	PAR-CLIP
mirtarbase	MIMAT0000066	hsa-let-7e-5p	PPP1R15B	84919	ENSG00000158615	PAR-CLIP
mirtarbase	MIMAT0000066	hsa-let-7e-5p	ARHGAP19	84986	ENSG00000213390	CLASH
mirtarbase	MIMAT0000066	hsa-let-7e-5p	ARHGAP19	84986	ENSG00000213390	CLASH
mirtarbase	MIMAT0000066	hsa-let-7e-5p	LMLN	89782	ENSG00000185621	CLASH
mirtarbase	MIMAT0000066	hsa-let-7e-5p	LMLN	89782	ENSG00000185621	CLASH
mirtarbase	MIMAT0000066	hsa-let-7e-5p	MIDN	90007	ENSG00000167470	PAR-CLIP
mirtarbase	MIMAT0000066	hsa-let-7e-5p	ZNF799	90576	ENSG00000196466	HITS-CLIP
mirtarbase	MIMAT0000066	hsa-let-7e-5p	ZNF799	90576	ENSG00000196466	HITS-CLIP
mirtarbase	MIMAT0000066	hsa-let-7e-5p	DHX57	90957	ENSG00000163214	CLASH
mirtarbase	MIMAT0000066	hsa-let-7e-5p	DHX57	90957	ENSG00000163214	CLASH
mirtarbase	MIMAT0000066	hsa-let-7e-5p	FMNL3	91010	ENSG00000161791	PAR-CLIP
mirtarbase	MIMAT0000066	hsa-let-7e-5p	FMNL3	91010	ENSG00000161791	PAR-CLIP
mirtarbase	MIMAT0000066	hsa-let-7e-5p	ANKRD40	91369	ENSG00000154945	CLASH
mirtarbase	MIMAT0000066	hsa-let-7e-5p	ANKRD40	91369	ENSG00000154945	CLASH
mirtarbase	MIMAT0000066	hsa-let-7e-5p	CABLES1	91768	ENSG00000134508	CLASH
mirtarbase	MIMAT0000066	hsa-let-7e-5p	CABLES1	91768	ENSG00000134508	CLASH
mirtarbase	MIMAT0000066	hsa-let-7e-5p	TIMM50	92609	ENSG00000105197	CLASH
mirtarbase	MIMAT0000066	hsa-let-7e-5p	TIMM50	92609	ENSG00000105197	CLASH
mirtarbase	MIMAT0000066	hsa-let-7e-5p	MARS2	92935	ENSG00000247626	PAR-CLIP
mirtarbase	MIMAT0000066	hsa-let-7e-5p	ZFAND4	93550	ENSG00000172671	HITS-CLIP
mirtarbase	MIMAT0000066	hsa-let-7e-5p	ZFAND4	93550	ENSG00000172671	HITS-CLIP
mirtarbase	MIMAT0000066	hsa-let-7e-5p	ZFAND4	93550	ENSG00000172671	HITS-CLIP
mirtarbase	MIMAT0000066	hsa-let-7e-5p	ZFAND4	93550	ENSG00000172671	HITS-CLIP
mirtarbase	MIMAT0000066	hsa-let-7e-5p	ZFAND4	93550	ENSG00000172671	HITS-CLIP
mirtarbase	MIMAT0000066	hsa-let-7e-5p	ZFAND4	93550	ENSG00000172671	PAR-CLIP
mirtarbase	MIMAT0000066	hsa-let-7e-5p	TBC1D31	93594	ENSG00000156787	CLASH
mirtarbase	MIMAT0000066	hsa-let-7e-5p	TBC1D31	93594	ENSG00000156787	CLASH
mirtarbase	MIMAT0000066	hsa-let-7e-5p	PIGS	94005	ENSG00000087111	CLASH
mirtarbase	MIMAT0000066	hsa-let-7e-5p	PIGS	94005	ENSG00000087111	CLASH
mirtarbase	MIMAT0000066	hsa-let-7e-5p	PDZD8	118987	ENSG00000165650	PAR-CLIP
mirtarbase	MIMAT0000066	hsa-let-7e-5p	PDZD8	118987	ENSG00000165650	PAR-CLIP
mirtarbase	MIMAT0000066	hsa-let-7e-5p	LRIG3	121227	ENSG00000139263	PAR-CLIP
mirtarbase	MIMAT0000066	hsa-let-7e-5p	LRIG3	121227	ENSG00000139263	PAR-CLIP
mirtarbase	MIMAT0000066	hsa-let-7e-5p	LRIG3	121227	ENSG00000139263	PAR-CLIP
mirtarbase	MIMAT0000066	hsa-let-7e-5p	LRIG3	121227	ENSG00000139263	PAR-CLIP
mirtarbase	MIMAT0000066	hsa-let-7e-5p	AEBP2	121536	ENSG00000139154	CLASH
mirtarbase	MIMAT0000066	hsa-let-7e-5p	AEBP2	121536	ENSG00000139154	CLASH
mirtarbase	MIMAT0000066	hsa-let-7e-5p	NAA30	122830	ENSG00000139977	PAR-CLIP
mirtarbase	MIMAT0000066	hsa-let-7e-5p	NAA30	122830	ENSG00000139977	PAR-CLIP
mirtarbase	MIMAT0000066	hsa-let-7e-5p	MSI2	124540	ENSG00000153944	PAR-CLIP
mirtarbase	MIMAT0000066	hsa-let-7e-5p	MSI2	124540	ENSG00000153944	PAR-CLIP
mirtarbase	MIMAT0000066	hsa-let-7e-5p	ZFP3	124961	ENSG00000180787	CLASH
mirtarbase	MIMAT0000066	hsa-let-7e-5p	ZFP3	124961	ENSG00000180787	CLASH
mirtarbase	MIMAT0000066	hsa-let-7e-5p	IRGQ	126298	ENSG00000167378	CLASH
mirtarbase	MIMAT0000066	hsa-let-7e-5p	IRGQ	126298	ENSG00000167378	CLASH
mirtarbase	MIMAT0000066	hsa-let-7e-5p	DCBLD2	131566	ENSG00000057019	CLASH
mirtarbase	MIMAT0000066	hsa-let-7e-5p	DCBLD2	131566	ENSG00000057019	CLASH
mirtarbase	MIMAT0000066	hsa-let-7e-5p	GRPEL2	134266	ENSG00000164284	PAR-CLIP
mirtarbase	MIMAT0000066	hsa-let-7e-5p	GRPEL2	134266	ENSG00000164284	PAR-CLIP
mirtarbase	MIMAT0000066	hsa-let-7e-5p	GRPEL2	134266	ENSG00000164284	PAR-CLIP
mirtarbase	MIMAT0000066	hsa-let-7e-5p	GRPEL2	134266	ENSG00000164284	PAR-CLIP
mirtarbase	MIMAT0000066	hsa-let-7e-5p	GRPEL2	134266	ENSG00000164284	PAR-CLIP
mirtarbase	MIMAT0000066	hsa-let-7e-5p	GRPEL2	134266	ENSG00000164284	PAR-CLIP
mirtarbase	MIMAT0000066	hsa-let-7e-5p	GRPEL2	134266	ENSG00000164284	PAR-CLIP
mirtarbase	MIMAT0000066	hsa-let-7e-5p	GRPEL2	134266	ENSG00000164284	PAR-CLIP
mirtarbase	MIMAT0000066	hsa-let-7e-5p	GRPEL2	134266	ENSG00000164284	PAR-CLIP
mirtarbase	MIMAT0000066	hsa-let-7e-5p	GRPEL2	134266	ENSG00000164284	PAR-CLIP
mirtarbase	MIMAT0000066	hsa-let-7e-5p	GRPEL2	134266	ENSG00000164284	PAR-CLIP
mirtarbase	MIMAT0000066	hsa-let-7e-5p	GRPEL2	134266	ENSG00000164284	PAR-CLIP
mirtarbase	MIMAT0000066	hsa-let-7e-5p	PM20D2	135293	ENSG00000146281	PAR-CLIP
mirtarbase	MIMAT0000066	hsa-let-7e-5p	PM20D2	135293	ENSG00000146281	PAR-CLIP
mirtarbase	MIMAT0000066	hsa-let-7e-5p	BRI3BP	140707	ENSG00000184992	HITS-CLIP
mirtarbase	MIMAT0000066	hsa-let-7e-5p	BRI3BP	140707	ENSG00000184992	HITS-CLIP
mirtarbase	MIMAT0000066	hsa-let-7e-5p	ZNF417	147687	ENSG00000173480	HITS-CLIP
mirtarbase	MIMAT0000066	hsa-let-7e-5p	ZNF417	147687	ENSG00000173480	HITS-CLIP
mirtarbase	MIMAT0000066	hsa-let-7e-5p	DTX3L	151636	ENSG00000163840	HITS-CLIP
mirtarbase	MIMAT0000066	hsa-let-7e-5p	DTX3L	151636	ENSG00000163840	HITS-CLIP
mirtarbase	MIMAT0000066	hsa-let-7e-5p	CEP120	153241	ENSG00000168944	PAR-CLIP
mirtarbase	MIMAT0000066	hsa-let-7e-5p	CEP120	153241	ENSG00000168944	PAR-CLIP
mirtarbase	MIMAT0000066	hsa-let-7e-5p	ANKRD46	157567	ENSG00000186106	PAR-CLIP
mirtarbase	MIMAT0000066	hsa-let-7e-5p	ANKRD46	157567	ENSG00000186106	PAR-CLIP
mirtarbase	MIMAT0000066	hsa-let-7e-5p	ANKRD46	157567	ENSG00000186106	PAR-CLIP
mirtarbase	MIMAT0000066	hsa-let-7e-5p	ANKRD46	157567	ENSG00000186106	PAR-CLIP
mirtarbase	MIMAT0000066	hsa-let-7e-5p	TMTC3	160418	ENSG00000139324	PAR-CLIP
mirtarbase	MIMAT0000066	hsa-let-7e-5p	TMTC3	160418	ENSG00000139324	PAR-CLIP
mirtarbase	MIMAT0000066	hsa-let-7e-5p	IFNLR1	163702	ENSG00000185436	PAR-CLIP
mirtarbase	MIMAT0000066	hsa-let-7e-5p	IFNLR1	163702	ENSG00000185436	PAR-CLIP
mirtarbase	MIMAT0000066	hsa-let-7e-5p	TXLNA	200081	ENSG00000084652	PAR-CLIP
mirtarbase	MIMAT0000066	hsa-let-7e-5p	TXLNA	200081	ENSG00000084652	PAR-CLIP
mirtarbase	MIMAT0000066	hsa-let-7e-5p	KLHDC8B	200942	ENSG00000185909	PAR-CLIP
mirtarbase	MIMAT0000066	hsa-let-7e-5p	KLHDC8B	200942	ENSG00000185909	PAR-CLIP
mirtarbase	MIMAT0000066	hsa-let-7e-5p	ZNF584	201514	ENSG00000171574	HITS-CLIP
mirtarbase	MIMAT0000066	hsa-let-7e-5p	ZNF584	201514	ENSG00000171574	HITS-CLIP
mirtarbase	MIMAT0000066	hsa-let-7e-5p	PDE12	201626	ENSG00000174840	PAR-CLIP
mirtarbase	MIMAT0000066	hsa-let-7e-5p	PDE12	201626	ENSG00000174840	PAR-CLIP
mirtarbase	MIMAT0000066	hsa-let-7e-5p	PDE12	201626	ENSG00000174840	PAR-CLIP
mirtarbase	MIMAT0000066	hsa-let-7e-5p	PDE12	201626	ENSG00000174840	PAR-CLIP
mirtarbase	MIMAT0000066	hsa-let-7e-5p	PDE12	201626	ENSG00000174840	PAR-CLIP
mirtarbase	MIMAT0000066	hsa-let-7e-5p	PDE12	201626	ENSG00000174840	PAR-CLIP
mirtarbase	MIMAT0000066	hsa-let-7e-5p	PDE12	201626	ENSG00000174840	PAR-CLIP
mirtarbase	MIMAT0000066	hsa-let-7e-5p	PDE12	201626	ENSG00000174840	PAR-CLIP
mirtarbase	MIMAT0000066	hsa-let-7e-5p	HIPK1	204851	ENSG00000163349	CLASH
mirtarbase	MIMAT0000066	hsa-let-7e-5p	HIPK1	204851	ENSG00000163349	CLASH
mirtarbase	MIMAT0000066	hsa-let-7e-5p	SLC16A9	220963	ENSG00000165449	PAR-CLIP
mirtarbase	MIMAT0000066	hsa-let-7e-5p	SLC16A9	220963	ENSG00000165449	PAR-CLIP
mirtarbase	MIMAT0000066	hsa-let-7e-5p	SPATA13	221178	ENSG00000182957	CLASH
mirtarbase	MIMAT0000066	hsa-let-7e-5p	SPATA13	221178	ENSG00000182957	CLASH
mirtarbase	MIMAT0000066	hsa-let-7e-5p	JAZF1	221895	ENSG00000153814	CLASH
mirtarbase	MIMAT0000066	hsa-let-7e-5p	JAZF1	221895	ENSG00000153814	CLASH
mirtarbase	MIMAT0000066	hsa-let-7e-5p	TMED4	222068	ENSG00000158604	PAR-CLIP
mirtarbase	MIMAT0000066	hsa-let-7e-5p	UBN2	254048	ENSG00000157741	CLASH
mirtarbase	MIMAT0000066	hsa-let-7e-5p	UBN2	254048	ENSG00000157741	CLASH
mirtarbase	MIMAT0000066	hsa-let-7e-5p	RNF144B	255488	ENSG00000137393	PAR-CLIP
mirtarbase	MIMAT0000066	hsa-let-7e-5p	RNF144B	255488	ENSG00000137393	PAR-CLIP
mirtarbase	MIMAT0000066	hsa-let-7e-5p	PGM2L1	283209	ENSG00000165434	PAR-CLIP
mirtarbase	MIMAT0000066	hsa-let-7e-5p	PGM2L1	283209	ENSG00000165434	PAR-CLIP
mirtarbase	MIMAT0000066	hsa-let-7e-5p	MTX3	345778	ENSG00000177034	HITS-CLIP
mirtarbase	MIMAT0000066	hsa-let-7e-5p	MTX3	345778	ENSG00000177034	HITS-CLIP
mirtarbase	MIMAT0000066	hsa-let-7e-5p	SKA2	348235	ENSG00000182628	CLASH
mirtarbase	MIMAT0000066	hsa-let-7e-5p	SKA2	348235	ENSG00000182628	CLASH
mirtarbase	MIMAT0000066	hsa-let-7e-5p	NHLRC2	374354	ENSG00000196865	HITS-CLIP
mirtarbase	MIMAT0000066	hsa-let-7e-5p	NHLRC2	374354	ENSG00000196865	HITS-CLIP
mirtarbase	MIMAT0000066	hsa-let-7e-5p	NHLRC3	387921	ENSG00000188811	PAR-CLIP
mirtarbase	MIMAT0000066	hsa-let-7e-5p	NHLRC3	387921	ENSG00000188811	PAR-CLIP
mirtarbase	MIMAT0000066	hsa-let-7e-5p	NHLRC3	387921	ENSG00000188811	PAR-CLIP
mirtarbase	MIMAT0000066	hsa-let-7e-5p	NHLRC3	387921	ENSG00000188811	PAR-CLIP
mirtarbase	MIMAT0000066	hsa-let-7e-5p	NHLRC3	387921	ENSG00000188811	PAR-CLIP
mirtarbase	MIMAT0000066	hsa-let-7e-5p	NHLRC3	387921	ENSG00000188811	PAR-CLIP
mirtarbase	MIMAT0000066	hsa-let-7e-5p	BEND4	389206	ENSG00000188848	PAR-CLIP
mirtarbase	MIMAT0000066	hsa-let-7e-5p	BEND4	389206	ENSG00000188848	PAR-CLIP
mirtarbase	MIMAT0000066	hsa-let-7e-5p	BEND4	389206	ENSG00000188848	PAR-CLIP
mirtarbase	MIMAT0000066	hsa-let-7e-5p	BEND4	389206	ENSG00000188848	PAR-CLIP
mirtarbase	MIMAT0000066	hsa-let-7e-5p	RBM12B	389677	ENSG00000183808	PAR-CLIP
mirtarbase	MIMAT0000066	hsa-let-7e-5p	RBM12B	389677	ENSG00000183808	PAR-CLIP
mirtarbase	MIMAT0000066	hsa-let-7e-5p	RBM12B	389677	ENSG00000183808	PAR-CLIP
mirtarbase	MIMAT0000066	hsa-let-7e-5p	RBM12B	389677	ENSG00000183808	PAR-CLIP
mirtarbase	MIMAT0000066	hsa-let-7e-5p	ZNF805	390980	ENSG00000204524	CLASH
mirtarbase	MIMAT0000066	hsa-let-7e-5p	ZNF805	390980	ENSG00000204524	CLASH
mirtarbase	MIMAT0000066	hsa-let-7e-5p	FNDC9	408263	ENSG00000172568	PAR-CLIP
mirtarbase	MIMAT0000066	hsa-let-7e-5p	IGF1	3479	ENSG00000017427	Luciferase reporter assay//qRT-PCR//Western blot
mirtarbase	MIMAT0000066	hsa-let-7e-5p	IGF1	3479	ENSG00000017427	Luciferase reporter assay//qRT-PCR//Western blot
mirtarbase	MIMAT0000066	hsa-let-7e-5p	LYN	4067	ENSG00000254087	PAR-CLIP
mirtarbase	MIMAT0000066	hsa-let-7e-5p	LYN	4067	ENSG00000254087	PAR-CLIP
mirtarbase	MIMAT0000066	hsa-let-7e-5p	PEG10	23089	ENSG00000242265	PAR-CLIP
mirtarbase	MIMAT0000066	hsa-let-7e-5p	PEG10	23089	ENSG00000242265	PAR-CLIP
mirtarbase	MIMAT0000066	hsa-let-7e-5p	SALL3	27164	ENSG00000256463	PAR-CLIP
mirtarbase	MIMAT0000066	hsa-let-7e-5p	SALL3	27164	ENSG00000256463	PAR-CLIP
mirtarbase	MIMAT0000066	hsa-let-7e-5p	SYT7	9066	ENSG00000011347	Luciferase reporter assay//Immunohistochemistry (IHC)
mirtarbase	MIMAT0000066	hsa-let-7e-5p	VAMP2	6844	ENSG00000220205	CLASH
mirtarbase	MIMAT0000066	hsa-let-7e-5p	VAMP2	6844	ENSG00000220205	CLASH
mirtarbase	MIMAT0000066	hsa-let-7e-5p	SUOX	6821	ENSG00000139531	PAR-CLIP
mirtarbase	MIMAT0000066	hsa-let-7e-5p	SUOX	6821	ENSG00000139531	PAR-CLIP
mirtarbase	MIMAT0000066	hsa-let-7e-5p	CRX	1406	ENSG00000105392	PAR-CLIP
mirtarbase	MIMAT0000066	hsa-let-7e-5p	CYP2B6	1555	ENSG00000197408	CLASH
mirtarbase	MIMAT0000066	hsa-let-7e-5p	CYP2B6	1555	ENSG00000197408	CLASH
mirtarbase	MIMAT0000066	hsa-let-7e-5p	PRIM2	5558	ENSG00000146143	HITS-CLIP
mirtarbase	MIMAT0000066	hsa-let-7e-5p	PRIM2	5558	ENSG00000146143	HITS-CLIP
mirtarbase	MIMAT0000066	hsa-let-7e-5p	ZNF774	342132	ENSG00000196391	PAR-CLIP
mirtarbase	MIMAT0000066	hsa-let-7e-5p	ZNF774	342132	ENSG00000196391	PAR-CLIP
mirtarbase	MIMAT0000066	hsa-let-7e-5p	ZNF774	342132	ENSG00000196391	PAR-CLIP
mirtarbase	MIMAT0000066	hsa-let-7e-5p	ZNF774	342132	ENSG00000196391	HITS-CLIP
mirtarbase	MIMAT0000066	hsa-let-7e-5p	SUMO1	7341	ENSG00000116030	PAR-CLIP
mirtarbase	MIMAT0000066	hsa-let-7e-5p	SUMO1	7341	ENSG00000116030	PAR-CLIP
mirtarbase	MIMAT0000066	hsa-let-7e-5p	RWDD1	51389	ENSG00000111832	HITS-CLIP
mirtarbase	MIMAT0000066	hsa-let-7e-5p	RWDD1	51389	ENSG00000111832	HITS-CLIP
mirtarbase	MIMAT0000066	hsa-let-7e-5p	ACER2	340485	ENSG00000177076	PAR-CLIP
mirtarbase	MIMAT0000066	hsa-let-7e-5p	ACER2	340485	ENSG00000177076	PAR-CLIP
mirtarbase	MIMAT0000066	hsa-let-7e-5p	SUGP2	10147	ENSG00000064607	CLASH
mirtarbase	MIMAT0000066	hsa-let-7e-5p	SUGP2	10147	ENSG00000064607	CLASH
mirtarbase	MIMAT0000066	hsa-let-7e-5p	DCAF6	55827	ENSG00000143164	CLASH
mirtarbase	MIMAT0000066	hsa-let-7e-5p	DCAF6	55827	ENSG00000143164	CLASH
mirtarbase	MIMAT0000066	hsa-let-7e-5p	OPA3	80207	ENSG00000125741	PAR-CLIP
mirtarbase	MIMAT0000066	hsa-let-7e-5p	OPA3	80207	ENSG00000125741	PAR-CLIP
mirtarbase	MIMAT0000066	hsa-let-7e-5p	OPA3	80207	ENSG00000125741	PAR-CLIP
mirtarbase	MIMAT0000066	hsa-let-7e-5p	OPA3	80207	ENSG00000125741	PAR-CLIP
mirtarbase	MIMAT0000066	hsa-let-7e-5p	CELF1	10658	ENSG00000149187	PAR-CLIP
mirtarbase	MIMAT0000066	hsa-let-7e-5p	CELF1	10658	ENSG00000149187	PAR-CLIP
mirtarbase	MIMAT0000066	hsa-let-7e-5p	KCTD21	283219	ENSG00000188997	PAR-CLIP
mirtarbase	MIMAT0000066	hsa-let-7e-5p	KCTD21	283219	ENSG00000188997	PAR-CLIP
mirtarbase	MIMAT0000066	hsa-let-7e-5p	SPN	6693	ENSG00000197471	CLASH
mirtarbase	MIMAT0000066	hsa-let-7e-5p	SPN	6693	ENSG00000197471	CLASH
mirtarbase	MIMAT0000066	hsa-let-7e-5p	ACOT9	23597	ENSG00000123130	PAR-CLIP
mirtarbase	MIMAT0000066	hsa-let-7e-5p	ACOT9	23597	ENSG00000123130	PAR-CLIP
mirtarbase	MIMAT0000066	hsa-let-7e-5p	ACOT9	23597	ENSG00000123130	PAR-CLIP
mirtarbase	MIMAT0000066	hsa-let-7e-5p	ACOT9	23597	ENSG00000123130	PAR-CLIP
mirtarbase	MIMAT0000066	hsa-let-7e-5p	THYN1	29087	ENSG00000151500	PAR-CLIP
mirtarbase	MIMAT0000066	hsa-let-7e-5p	THYN1	29087	ENSG00000151500	PAR-CLIP
mirtarbase	MIMAT0000066	hsa-let-7e-5p	ZNF284	342909	ENSG00000186026	CLASH
mirtarbase	MIMAT0000066	hsa-let-7e-5p	ZNF284	342909	ENSG00000186026	CLASH
mirtarbase	MIMAT0000066	hsa-let-7e-5p	DNAJC28	54943	ENSG00000177692	HITS-CLIP
mirtarbase	MIMAT0000066	hsa-let-7e-5p	DNAJC28	54943	ENSG00000177692	HITS-CLIP
mirtarbase	MIMAT0000066	hsa-let-7e-5p	RHBDD2	57414	ENSG00000005486	CLASH
mirtarbase	MIMAT0000066	hsa-let-7e-5p	RHBDD2	57414	ENSG00000005486	CLASH
mirtarbase	MIMAT0000066	hsa-let-7e-5p	TNFRSF1A	7132	ENSG00000067182	CLASH
mirtarbase	MIMAT0000066	hsa-let-7e-5p	TNFRSF1A	7132	ENSG00000067182	CLASH
mirtarbase	MIMAT0000066	hsa-let-7e-5p	TUBB2A	7280	ENSG00000137267	PAR-CLIP
mirtarbase	MIMAT0000066	hsa-let-7e-5p	TUBB2A	7280	ENSG00000137267	PAR-CLIP
mirtarbase	MIMAT0000066	hsa-let-7e-5p	HS6ST2	90161	ENSG00000171004	CLASH
mirtarbase	MIMAT0000066	hsa-let-7e-5p	HS6ST2	90161	ENSG00000171004	CLASH
mirtarbase	MIMAT0000066	hsa-let-7e-5p	HNRNPC	3183	ENSG00000092199	CLASH
mirtarbase	MIMAT0000066	hsa-let-7e-5p	HNRNPC	3183	ENSG00000092199	CLASH
mirtarbase	MIMAT0000066	hsa-let-7e-5p	FAM222B	55731	ENSG00000173065	PAR-CLIP
mirtarbase	MIMAT0000066	hsa-let-7e-5p	FAM222B	55731	ENSG00000173065	PAR-CLIP
mirtarbase	MIMAT0000066	hsa-let-7e-5p	UBXN2B	137886	ENSG00000215114	PAR-CLIP
mirtarbase	MIMAT0000066	hsa-let-7e-5p	UBXN2B	137886	ENSG00000215114	PAR-CLIP
mirtarbase	MIMAT0000066	hsa-let-7e-5p	DNA2	1763	ENSG00000138346	PAR-CLIP
mirtarbase	MIMAT0000066	hsa-let-7e-5p	DNA2	1763	ENSG00000138346	PAR-CLIP
mirtarbase	MIMAT0000066	hsa-let-7e-5p	NAA60	79903	ENSG00000122390	CLASH
mirtarbase	MIMAT0000066	hsa-let-7e-5p	NAA60	79903	ENSG00000122390	CLASH
mirtarbase	MIMAT0000066	hsa-let-7e-5p	THADA	63892	ENSG00000115970	CLASH
mirtarbase	MIMAT0000066	hsa-let-7e-5p	THADA	63892	ENSG00000115970	CLASH
mirtarbase	MIMAT0000066	hsa-let-7e-5p	PCBP2	5094	ENSG00000197111	CLASH
mirtarbase	MIMAT0000066	hsa-let-7e-5p	PCBP2	5094	ENSG00000197111	CLASH
mirtarbase	MIMAT0000066	hsa-let-7e-5p	ZNF578	147660	ENSG00000258405	HITS-CLIP
mirtarbase	MIMAT0000066	hsa-let-7e-5p	ZNF578	147660	ENSG00000258405	HITS-CLIP
mirtarbase	MIMAT0000066	hsa-let-7e-5p	ALG13	79868	ENSG00000101901	CLASH
mirtarbase	MIMAT0000066	hsa-let-7e-5p	ALG13	79868	ENSG00000101901	CLASH
mirtarbase	MIMAT0000066	hsa-let-7e-5p	ZBTB37	84614	ENSG00000185278	PAR-CLIP
mirtarbase	MIMAT0000066	hsa-let-7e-5p	ZBTB37	84614	ENSG00000185278	PAR-CLIP
mirtarbase	MIMAT0000066	hsa-let-7e-5p	CNBP	7555	ENSG00000169714	CLASH
mirtarbase	MIMAT0000066	hsa-let-7e-5p	CNBP	7555	ENSG00000169714	CLASH
mirtarbase	MIMAT0000066	hsa-let-7e-5p	RHD	6007	ENSG00000187010	PAR-CLIP//HITS-CLIP
mirtarbase	MIMAT0000066	hsa-let-7e-5p	RHD	6007	ENSG00000187010	PAR-CLIP//HITS-CLIP
mirtarbase	MIMAT0000066	hsa-let-7e-5p	RHD	6007	ENSG00000187010	PAR-CLIP//HITS-CLIP
mirtarbase	MIMAT0000066	hsa-let-7e-5p	RHD	6007	ENSG00000187010	PAR-CLIP
mirtarbase	MIMAT0000066	hsa-let-7e-5p	RHD	6007	ENSG00000187010	HITS-CLIP
mirtarbase	MIMAT0000066	hsa-let-7e-5p	RHD	6007	ENSG00000187010	HITS-CLIP
mirtarbase	MIMAT0000066	hsa-let-7e-5p	KRBOX4	55634	ENSG00000147121	CLASH
mirtarbase	MIMAT0000066	hsa-let-7e-5p	KRBOX4	55634	ENSG00000147121	CLASH
mirtarbase	MIMAT0000066	hsa-let-7e-5p	RBBP4	5928	ENSG00000162521	CLASH
mirtarbase	MIMAT0000066	hsa-let-7e-5p	RBBP4	5928	ENSG00000162521	CLASH
mirtarbase	MIMAT0000066	hsa-let-7e-5p	OTUD5	55593	ENSG00000068308	CLASH
mirtarbase	MIMAT0000066	hsa-let-7e-5p	OTUD5	55593	ENSG00000068308	CLASH
mirtarbase	MIMAT0000066	hsa-let-7e-5p	RCOR3	55758	ENSG00000117625	CLASH
mirtarbase	MIMAT0000066	hsa-let-7e-5p	RCOR3	55758	ENSG00000117625	CLASH
mirtarbase	MIMAT0000066	hsa-let-7e-5p	ATXN7L3B	552889	ENSG00000253719	PAR-CLIP
mirtarbase	MIMAT0000066	hsa-let-7e-5p	ATXN7L3B	552889	ENSG00000253719	PAR-CLIP
mirtarbase	MIMAT0000066	hsa-let-7e-5p	ATXN7L3B	552889	ENSG00000253719	PAR-CLIP
mirtarbase	MIMAT0000066	hsa-let-7e-5p	ATXN7L3B	552889	ENSG00000253719	PAR-CLIP
mirtarbase	MIMAT0000066	hsa-let-7e-5p	ZNF566	84924	ENSG00000186017	PAR-CLIP
mirtarbase	MIMAT0000066	hsa-let-7e-5p	ZNF566	84924	ENSG00000186017	PAR-CLIP
mirtarbase	MIMAT0000066	hsa-let-7e-5p	ZNF566	84924	ENSG00000186017	PAR-CLIP
mirtarbase	MIMAT0000066	hsa-let-7e-5p	ZNF566	84924	ENSG00000186017	PAR-CLIP
mirtarbase	MIMAT0000066	hsa-let-7e-5p	ZNF566	84924	ENSG00000186017	PAR-CLIP
mirtarbase	MIMAT0000066	hsa-let-7e-5p	ZNF566	84924	ENSG00000186017	PAR-CLIP
mirtarbase	MIMAT0000066	hsa-let-7e-5p	MTFR1	9650	ENSG00000066855	CLASH
mirtarbase	MIMAT0000066	hsa-let-7e-5p	MTFR1	9650	ENSG00000066855	CLASH
mirtarbase	MIMAT0000066	hsa-let-7e-5p	BRI3	25798	ENSG00000164713	CLASH
mirtarbase	MIMAT0000066	hsa-let-7e-5p	BRI3	25798	ENSG00000164713	CLASH
mirtarbase	MIMAT0000066	hsa-let-7e-5p	C1orf210	149466	ENSG00000253313	PAR-CLIP//HITS-CLIP
mirtarbase	MIMAT0000066	hsa-let-7e-5p	C1orf210	149466	ENSG00000253313	PAR-CLIP//HITS-CLIP
mirtarbase	MIMAT0000066	hsa-let-7e-5p	C1orf210	149466	ENSG00000253313	PAR-CLIP//HITS-CLIP
mirtarbase	MIMAT0000066	hsa-let-7e-5p	C1orf210	149466	ENSG00000253313	PAR-CLIP
mirtarbase	MIMAT0000066	hsa-let-7e-5p	C1orf210	149466	ENSG00000253313	PAR-CLIP
mirtarbase	MIMAT0000066	hsa-let-7e-5p	C1orf210	149466	ENSG00000253313	HITS-CLIP
mirtarbase	MIMAT0000066	hsa-let-7e-5p	UROC1	131669	ENSG00000159650	CLASH
mirtarbase	MIMAT0000066	hsa-let-7e-5p	UROC1	131669	ENSG00000159650	CLASH
mirtarbase	MIMAT0000066	hsa-let-7e-5p	C11orf91	100131378	ENSG00000205177	CLASH
mirtarbase	MIMAT0000066	hsa-let-7e-5p	C11orf91	100131378	ENSG00000205177	CLASH
mirtarbase	MIMAT0000066	hsa-let-7e-5p	CDH18	1016	ENSG00000145526	CLASH
mirtarbase	MIMAT0000066	hsa-let-7e-5p	CDH18	1016	ENSG00000145526	CLASH
mirtarbase	MIMAT0000066	hsa-let-7e-5p	ZFP62	643836	ENSG00000196670	CLASH
mirtarbase	MIMAT0000066	hsa-let-7e-5p	ZFP62	643836	ENSG00000196670	CLASH
mirtarbase	MIMAT0000066	hsa-let-7e-5p	RAB40C	57799	ENSG00000197562	PAR-CLIP
mirtarbase	MIMAT0000066	hsa-let-7e-5p	RAB40C	57799	ENSG00000197562	PAR-CLIP
mirtarbase	MIMAT0000066	hsa-let-7e-5p	RAI2	10742	ENSG00000131831	CLASH
mirtarbase	MIMAT0000066	hsa-let-7e-5p	RAI2	10742	ENSG00000131831	CLASH
mirtarbase	MIMAT0000066	hsa-let-7e-5p	RABL6	55684	ENSG00000196642	CLASH
mirtarbase	MIMAT0000066	hsa-let-7e-5p	RABL6	55684	ENSG00000196642	CLASH
mirtarbase	MIMAT0000066	hsa-let-7e-5p	POLL	27343	ENSG00000166169	PAR-CLIP
mirtarbase	MIMAT0000066	hsa-let-7e-5p	FBXL20	84961	ENSG00000108306	PAR-CLIP
mirtarbase	MIMAT0000066	hsa-let-7e-5p	FBXL20	84961	ENSG00000108306	PAR-CLIP
mirtarbase	MIMAT0000066	hsa-let-7e-5p	NDUFS5	4725	ENSG00000168653	CLASH
mirtarbase	MIMAT0000066	hsa-let-7e-5p	NDUFS5	4725	ENSG00000168653	CLASH
mirtarbase	MIMAT0000066	hsa-let-7e-5p	DGCR8	54487	ENSG00000128191	CLASH
mirtarbase	MIMAT0000066	hsa-let-7e-5p	DGCR8	54487	ENSG00000128191	CLASH
mirtarbase	MIMAT0000066	hsa-let-7e-5p	RBM14	10432	ENSG00000239306	CLASH
mirtarbase	MIMAT0000066	hsa-let-7e-5p	RBM14	10432	ENSG00000239306	CLASH
mirtarbase	MIMAT0000066	hsa-let-7e-5p	SMAP2	64744	ENSG00000084070	CLASH
mirtarbase	MIMAT0000066	hsa-let-7e-5p	SMAP2	64744	ENSG00000084070	CLASH
mirtarbase	MIMAT0000066	hsa-let-7e-5p	SERF2	10169	ENSG00000140264	CLASH
mirtarbase	MIMAT0000066	hsa-let-7e-5p	SERF2	10169	ENSG00000140264	CLASH
mirtarbase	MIMAT0000066	hsa-let-7e-5p	DNAH9	1770	ENSG00000007174	HITS-CLIP
mirtarbase	MIMAT0000066	hsa-let-7e-5p	DNAH9	1770	ENSG00000007174	HITS-CLIP
mirtarbase	MIMAT0000066	hsa-let-7e-5p	AQP6	363	ENSG00000086159	PAR-CLIP
mirtarbase	MIMAT0000066	hsa-let-7e-5p	COL8A1	1295	ENSG00000144810	PAR-CLIP
mirtarbase	MIMAT0000066	hsa-let-7e-5p	COL8A1	1295	ENSG00000144810	PAR-CLIP
mirtarbase	MIMAT0000066	hsa-let-7e-5p	FMO4	2329	ENSG00000076258	HITS-CLIP
mirtarbase	MIMAT0000066	hsa-let-7e-5p	FMO4	2329	ENSG00000076258	HITS-CLIP
mirtarbase	MIMAT0000066	hsa-let-7e-5p	PSMA6	5687	ENSG00000100902	CLASH
mirtarbase	MIMAT0000066	hsa-let-7e-5p	PSMA6	5687	ENSG00000100902	CLASH
mirtarbase	MIMAT0000066	hsa-let-7e-5p	RPA1	6117	ENSG00000132383	CLASH
mirtarbase	MIMAT0000066	hsa-let-7e-5p	RPA1	6117	ENSG00000132383	CLASH
mirtarbase	MIMAT0000066	hsa-let-7e-5p	ATXN2	6311	ENSG00000204842	HITS-CLIP
mirtarbase	MIMAT0000066	hsa-let-7e-5p	ATXN2	6311	ENSG00000204842	HITS-CLIP
mirtarbase	MIMAT0000066	hsa-let-7e-5p	SSB	6741	ENSG00000138385	CLASH
mirtarbase	MIMAT0000066	hsa-let-7e-5p	SSB	6741	ENSG00000138385	CLASH
mirtarbase	MIMAT0000066	hsa-let-7e-5p	WASL	8976	ENSG00000106299	PAR-CLIP
mirtarbase	MIMAT0000066	hsa-let-7e-5p	WASL	8976	ENSG00000106299	PAR-CLIP
mirtarbase	MIMAT0000066	hsa-let-7e-5p	WASL	8976	ENSG00000106299	PAR-CLIP
mirtarbase	MIMAT0000066	hsa-let-7e-5p	WASL	8976	ENSG00000106299	PAR-CLIP
mirtarbase	MIMAT0000066	hsa-let-7e-5p	WASL	8976	ENSG00000106299	PAR-CLIP
mirtarbase	MIMAT0000066	hsa-let-7e-5p	WASL	8976	ENSG00000106299	PAR-CLIP
mirtarbase	MIMAT0000066	hsa-let-7e-5p	AMPD2	271	ENSG00000116337	CLASH
mirtarbase	MIMAT0000066	hsa-let-7e-5p	AMPD2	271	ENSG00000116337	CLASH
mirtarbase	MIMAT0000066	hsa-let-7e-5p	JMJD1C	221037	ENSG00000171988	CLASH
mirtarbase	MIMAT0000066	hsa-let-7e-5p	JMJD1C	221037	ENSG00000171988	CLASH
mirtarbase	MIMAT0000066	hsa-let-7e-5p	ENSA	2029	ENSG00000143420	CLASH
mirtarbase	MIMAT0000066	hsa-let-7e-5p	ENSA	2029	ENSG00000143420	CLASH
mirtarbase	MIMAT0000066	hsa-let-7e-5p	PPIG	9360	ENSG00000138398	CLASH
mirtarbase	MIMAT0000066	hsa-let-7e-5p	PPIG	9360	ENSG00000138398	CLASH
mirtarbase	MIMAT0000066	hsa-let-7e-5p	MPL	4352	ENSG00000117400	Luciferase reporter assay
mirtarbase	MIMAT0000066	hsa-let-7e-5p	MPL	4352	ENSG00000117400	Luciferase reporter assay
mirtarbase	MIMAT0000066	hsa-let-7e-5p	ARIH1	25820	ENSG00000166233	PAR-CLIP
mirtarbase	MIMAT0000066	hsa-let-7e-5p	ARIH1	25820	ENSG00000166233	PAR-CLIP
mirtarbase	MIMAT0000066	hsa-let-7e-5p	ZNF256	10172	ENSG00000152454	CLASH
mirtarbase	MIMAT0000066	hsa-let-7e-5p	ZNF256	10172	ENSG00000152454	CLASH
mirtarbase	MIMAT0000066	hsa-let-7e-5p	KATNB1	10300	ENSG00000140854	CLASH
mirtarbase	MIMAT0000066	hsa-let-7e-5p	KATNB1	10300	ENSG00000140854	CLASH
mirtarbase	MIMAT0000066	hsa-let-7e-5p	RANBP2	5903	ENSG00000153201	CLASH
mirtarbase	MIMAT0000066	hsa-let-7e-5p	RANBP2	5903	ENSG00000153201	CLASH
mirtarbase	MIMAT0000066	hsa-let-7e-5p	PFAS	5198	ENSG00000178921	CLASH
mirtarbase	MIMAT0000066	hsa-let-7e-5p	PFAS	5198	ENSG00000178921	CLASH
mirtarbase	MIMAT0000066	hsa-let-7e-5p	IKZF3	22806	ENSG00000161405	PAR-CLIP//HITS-CLIP
mirtarbase	MIMAT0000066	hsa-let-7e-5p	IKZF3	22806	ENSG00000161405	PAR-CLIP//HITS-CLIP
mirtarbase	MIMAT0000066	hsa-let-7e-5p	IKZF3	22806	ENSG00000161405	PAR-CLIP
mirtarbase	MIMAT0000066	hsa-let-7e-5p	IKZF3	22806	ENSG00000161405	HITS-CLIP
mirtarbase	MIMAT0000066	hsa-let-7e-5p	CCDC106	29903	ENSG00000173581	CLASH
mirtarbase	MIMAT0000066	hsa-let-7e-5p	CCDC106	29903	ENSG00000173581	CLASH
mirtarbase	MIMAT0000066	hsa-let-7e-5p	SETD1A	9739	ENSG00000099381	CLASH
mirtarbase	MIMAT0000066	hsa-let-7e-5p	SETD1A	9739	ENSG00000099381	CLASH
mirtarbase	MIMAT0000066	hsa-let-7e-5p	SPCS2	9789	ENSG00000118363	CLASH
mirtarbase	MIMAT0000066	hsa-let-7e-5p	SPCS2	9789	ENSG00000118363	CLASH
mirtarbase	MIMAT0000066	hsa-let-7e-5p	WDFY3	23001	ENSG00000163625	CLASH
mirtarbase	MIMAT0000066	hsa-let-7e-5p	WDFY3	23001	ENSG00000163625	CLASH
mirtarbase	MIMAT0000066	hsa-let-7e-5p	MCF2L2	23101	ENSG00000053524	PAR-CLIP//HITS-CLIP
mirtarbase	MIMAT0000066	hsa-let-7e-5p	MCF2L2	23101	ENSG00000053524	PAR-CLIP//HITS-CLIP
mirtarbase	MIMAT0000066	hsa-let-7e-5p	MCF2L2	23101	ENSG00000053524	PAR-CLIP//HITS-CLIP
mirtarbase	MIMAT0000066	hsa-let-7e-5p	MCF2L2	23101	ENSG00000053524	PAR-CLIP
mirtarbase	MIMAT0000066	hsa-let-7e-5p	MCF2L2	23101	ENSG00000053524	PAR-CLIP
mirtarbase	MIMAT0000066	hsa-let-7e-5p	MCF2L2	23101	ENSG00000053524	HITS-CLIP
mirtarbase	MIMAT0000066	hsa-let-7e-5p	ICOSLG	23308	ENSG00000160223	PAR-CLIP
mirtarbase	MIMAT0000066	hsa-let-7e-5p	ICOSLG	23308	ENSG00000160223	PAR-CLIP
mirtarbase	MIMAT0000066	hsa-let-7e-5p	PSD3	23362	ENSG00000156011	CLASH
mirtarbase	MIMAT0000066	hsa-let-7e-5p	PSD3	23362	ENSG00000156011	CLASH
mirtarbase	MIMAT0000066	hsa-let-7e-5p	ZZZ3	26009	ENSG00000036549	CLIP-Seq dataset analysis
mirtarbase	MIMAT0000066	hsa-let-7e-5p	ZZZ3	26009	ENSG00000036549	CLIP-Seq dataset analysis
mirtarbase	MIMAT0000066	hsa-let-7e-5p	LSR	51599	ENSG00000105699	CLASH
mirtarbase	MIMAT0000066	hsa-let-7e-5p	LSR	51599	ENSG00000105699	CLASH
mirtarbase	MIMAT0000066	hsa-let-7e-5p	PLEKHO1	51177	ENSG00000023902	PAR-CLIP
mirtarbase	MIMAT0000066	hsa-let-7e-5p	PLEKHO1	51177	ENSG00000023902	PAR-CLIP
mirtarbase	MIMAT0000066	hsa-let-7e-5p	PLEKHO1	51177	ENSG00000023902	PAR-CLIP
mirtarbase	MIMAT0000066	hsa-let-7e-5p	PLEKHO1	51177	ENSG00000023902	PAR-CLIP
mirtarbase	MIMAT0000066	hsa-let-7e-5p	CWC15	51503	ENSG00000150316	CLASH
mirtarbase	MIMAT0000066	hsa-let-7e-5p	CWC15	51503	ENSG00000150316	CLASH
mirtarbase	MIMAT0000066	hsa-let-7e-5p	COX16	51241	ENSG00000133983	CLASH
mirtarbase	MIMAT0000066	hsa-let-7e-5p	COX16	51241	ENSG00000133983	CLASH
mirtarbase	MIMAT0000066	hsa-let-7e-5p	OTUB1	55611	ENSG00000167770	CLASH
mirtarbase	MIMAT0000066	hsa-let-7e-5p	OTUB1	55611	ENSG00000167770	CLASH
mirtarbase	MIMAT0000066	hsa-let-7e-5p	SLC38A7	55238	ENSG00000103042	HITS-CLIP
mirtarbase	MIMAT0000066	hsa-let-7e-5p	SLC38A7	55238	ENSG00000103042	HITS-CLIP
mirtarbase	MIMAT0000066	hsa-let-7e-5p	TBC1D19	55296	ENSG00000109680	PAR-CLIP
mirtarbase	MIMAT0000066	hsa-let-7e-5p	TBC1D19	55296	ENSG00000109680	PAR-CLIP
mirtarbase	MIMAT0000066	hsa-let-7e-5p	RAD18	56852	ENSG00000070950	PAR-CLIP
mirtarbase	MIMAT0000066	hsa-let-7e-5p	RAD18	56852	ENSG00000070950	PAR-CLIP
mirtarbase	MIMAT0000066	hsa-let-7e-5p	NCLN	56926	ENSG00000125912	CLASH
mirtarbase	MIMAT0000066	hsa-let-7e-5p	NCLN	56926	ENSG00000125912	CLASH
mirtarbase	MIMAT0000066	hsa-let-7e-5p	PDP2	57546	ENSG00000172840	CLASH//PAR-CLIP
mirtarbase	MIMAT0000066	hsa-let-7e-5p	PDP2	57546	ENSG00000172840	CLASH//PAR-CLIP
mirtarbase	MIMAT0000066	hsa-let-7e-5p	PDP2	57546	ENSG00000172840	CLASH
mirtarbase	MIMAT0000066	hsa-let-7e-5p	PDP2	57546	ENSG00000172840	PAR-CLIP
mirtarbase	MIMAT0000066	hsa-let-7e-5p	WDR48	57599	ENSG00000114742	CLASH
mirtarbase	MIMAT0000066	hsa-let-7e-5p	WDR48	57599	ENSG00000114742	CLASH
mirtarbase	MIMAT0000066	hsa-let-7e-5p	NSD1	64324	ENSG00000165671	PAR-CLIP
mirtarbase	MIMAT0000066	hsa-let-7e-5p	NSD1	64324	ENSG00000165671	PAR-CLIP
mirtarbase	MIMAT0000066	hsa-let-7e-5p	CEP135	9662	ENSG00000174799	PAR-CLIP
mirtarbase	MIMAT0000066	hsa-let-7e-5p	CEP135	9662	ENSG00000174799	PAR-CLIP
mirtarbase	MIMAT0000066	hsa-let-7e-5p	CTC1	80169	ENSG00000178971	CLASH
mirtarbase	MIMAT0000066	hsa-let-7e-5p	CTC1	80169	ENSG00000178971	CLASH
mirtarbase	MIMAT0000066	hsa-let-7e-5p	EMILIN2	84034	ENSG00000132205	PAR-CLIP//HITS-CLIP
mirtarbase	MIMAT0000066	hsa-let-7e-5p	EMILIN2	84034	ENSG00000132205	PAR-CLIP//HITS-CLIP
mirtarbase	MIMAT0000066	hsa-let-7e-5p	EMILIN2	84034	ENSG00000132205	PAR-CLIP
mirtarbase	MIMAT0000066	hsa-let-7e-5p	EMILIN2	84034	ENSG00000132205	HITS-CLIP
mirtarbase	MIMAT0000066	hsa-let-7e-5p	TOMM40L	84134	ENSG00000158882	PAR-CLIP
mirtarbase	MIMAT0000066	hsa-let-7e-5p	TOMM40L	84134	ENSG00000158882	PAR-CLIP
mirtarbase	MIMAT0000066	hsa-let-7e-5p	NOA1	84273	ENSG00000084092	PAR-CLIP
mirtarbase	MIMAT0000066	hsa-let-7e-5p	NOA1	84273	ENSG00000084092	PAR-CLIP
mirtarbase	MIMAT0000066	hsa-let-7e-5p	NOA1	84273	ENSG00000084092	PAR-CLIP
mirtarbase	MIMAT0000066	hsa-let-7e-5p	NOA1	84273	ENSG00000084092	PAR-CLIP
mirtarbase	MIMAT0000066	hsa-let-7e-5p	NICN1	84276	ENSG00000145029	CLASH
mirtarbase	MIMAT0000066	hsa-let-7e-5p	NICN1	84276	ENSG00000145029	CLASH
mirtarbase	MIMAT0000066	hsa-let-7e-5p	TMEM107	84314	ENSG00000179029	CLASH
mirtarbase	MIMAT0000066	hsa-let-7e-5p	TMEM107	84314	ENSG00000179029	CLASH
mirtarbase	MIMAT0000066	hsa-let-7e-5p	COX14	84987	ENSG00000178449	CLASH
mirtarbase	MIMAT0000066	hsa-let-7e-5p	COX14	84987	ENSG00000178449	CLASH
mirtarbase	MIMAT0000066	hsa-let-7e-5p	RAB11FIP4	84440	ENSG00000131242	PAR-CLIP
mirtarbase	MIMAT0000066	hsa-let-7e-5p	RAB11FIP4	84440	ENSG00000131242	PAR-CLIP
mirtarbase	MIMAT0000066	hsa-let-7e-5p	CCDC97	90324	ENSG00000142039	CLASH
mirtarbase	MIMAT0000066	hsa-let-7e-5p	CCDC97	90324	ENSG00000142039	CLASH
mirtarbase	MIMAT0000066	hsa-let-7e-5p	ZC3HAV1L	92092	ENSG00000146858	PAR-CLIP
mirtarbase	MIMAT0000066	hsa-let-7e-5p	ZC3HAV1L	92092	ENSG00000146858	PAR-CLIP
mirtarbase	MIMAT0000066	hsa-let-7e-5p	NOM1	64434	ENSG00000146909	PAR-CLIP
mirtarbase	MIMAT0000066	hsa-let-7e-5p	NOM1	64434	ENSG00000146909	PAR-CLIP
mirtarbase	MIMAT0000066	hsa-let-7e-5p	NOM1	64434	ENSG00000146909	PAR-CLIP
mirtarbase	MIMAT0000066	hsa-let-7e-5p	NOM1	64434	ENSG00000146909	PAR-CLIP
mirtarbase	MIMAT0000066	hsa-let-7e-5p	SDR42E1	93517	ENSG00000184860	PAR-CLIP
mirtarbase	MIMAT0000066	hsa-let-7e-5p	SDR42E1	93517	ENSG00000184860	PAR-CLIP
mirtarbase	MIMAT0000066	hsa-let-7e-5p	MAP2K7	5609	ENSG00000076984	PAR-CLIP
mirtarbase	MIMAT0000066	hsa-let-7e-5p	MAP2K7	5609	ENSG00000076984	PAR-CLIP
mirtarbase	MIMAT0000066	hsa-let-7e-5p	MAP2K7	5609	ENSG00000076984	PAR-CLIP
mirtarbase	MIMAT0000066	hsa-let-7e-5p	MAP2K7	5609	ENSG00000076984	PAR-CLIP
mirtarbase	MIMAT0000066	hsa-let-7e-5p	MFSD8	256471	ENSG00000164073	PAR-CLIP
mirtarbase	MIMAT0000066	hsa-let-7e-5p	MFSD8	256471	ENSG00000164073	PAR-CLIP
mirtarbase	MIMAT0000066	hsa-let-7e-5p	PIGP	51227	ENSG00000185808	CLASH
mirtarbase	MIMAT0000066	hsa-let-7e-5p	PIGP	51227	ENSG00000185808	CLASH
mirtarbase	MIMAT0000066	hsa-let-7e-5p	FAM43A	131583	ENSG00000185112	PAR-CLIP
mirtarbase	MIMAT0000066	hsa-let-7e-5p	FAM43A	131583	ENSG00000185112	PAR-CLIP
mirtarbase	MIMAT0000066	hsa-let-7e-5p	FAM43A	131583	ENSG00000185112	PAR-CLIP
mirtarbase	MIMAT0000066	hsa-let-7e-5p	FAM43A	131583	ENSG00000185112	PAR-CLIP
mirtarbase	MIMAT0000066	hsa-let-7e-5p	OR7D2	162998	ENSG00000188000	CLASH
mirtarbase	MIMAT0000066	hsa-let-7e-5p	OR7D2	162998	ENSG00000188000	CLASH
mirtarbase	MIMAT0000066	hsa-let-7e-5p	ZBTB8OS	339487	ENSG00000176261	PAR-CLIP//HITS-CLIP
mirtarbase	MIMAT0000066	hsa-let-7e-5p	ZBTB8OS	339487	ENSG00000176261	PAR-CLIP//HITS-CLIP
mirtarbase	MIMAT0000066	hsa-let-7e-5p	ZBTB8OS	339487	ENSG00000176261	PAR-CLIP
mirtarbase	MIMAT0000066	hsa-let-7e-5p	ZBTB8OS	339487	ENSG00000176261	HITS-CLIP
mirtarbase	MIMAT0000066	hsa-let-7e-5p	NAT8L	339983	ENSG00000185818	PAR-CLIP
mirtarbase	MIMAT0000066	hsa-let-7e-5p	NAT8L	339983	ENSG00000185818	PAR-CLIP
mirtarbase	MIMAT0000066	hsa-let-7e-5p	CARM1	10498	ENSG00000142453	CLASH
mirtarbase	MIMAT0000066	hsa-let-7e-5p	CARM1	10498	ENSG00000142453	CLASH
mirtarbase	MIMAT0000066	hsa-let-7e-5p	MS4A10	341116	ENSG00000172689	CLASH
mirtarbase	MIMAT0000066	hsa-let-7e-5p	MS4A10	341116	ENSG00000172689	CLASH
mirtarbase	MIMAT0000066	hsa-let-7e-5p	FAM83G	644815	ENSG00000188522	PAR-CLIP
mirtarbase	MIMAT0000066	hsa-let-7e-5p	FAM83G	644815	ENSG00000188522	PAR-CLIP
mirtarbase	MIMAT0000066	hsa-let-7e-5p	FAM83G	644815	ENSG00000188522	PAR-CLIP
mirtarbase	MIMAT0000066	hsa-let-7e-5p	FAM83G	644815	ENSG00000188522	PAR-CLIP
mirtarbase	MIMAT0000066	hsa-let-7e-5p	C19orf47	126526	ENSG00000160392	PAR-CLIP
mirtarbase	MIMAT0000066	hsa-let-7e-5p	C19orf47	126526	ENSG00000160392	PAR-CLIP
mirtarbase	MIMAT0000066	hsa-let-7e-5p	C19orf47	126526	ENSG00000160392	PAR-CLIP
mirtarbase	MIMAT0000066	hsa-let-7e-5p	C19orf47	126526	ENSG00000160392	PAR-CLIP
mirtarbase	MIMAT0000066	hsa-let-7e-5p	FZD9	8326	ENSG00000188763	PAR-CLIP
mirtarbase	MIMAT0000066	hsa-let-7e-5p	FZD9	8326	ENSG00000188763	PAR-CLIP
mirtarbase	MIMAT0000066	hsa-let-7e-5p	FZD9	8326	ENSG00000188763	PAR-CLIP
mirtarbase	MIMAT0000066	hsa-let-7e-5p	FZD9	8326	ENSG00000188763	PAR-CLIP
mirtarbase	MIMAT0000066	hsa-let-7e-5p	NUDT8	254552	ENSG00000167799	CLASH
mirtarbase	MIMAT0000066	hsa-let-7e-5p	NUDT8	254552	ENSG00000167799	CLASH
mirtarbase	MIMAT0000066	hsa-let-7e-5p	COX6B1	1340	ENSG00000126267	HITS-CLIP
mirtarbase	MIMAT0000066	hsa-let-7e-5p	COX6B1	1340	ENSG00000126267	HITS-CLIP
mirtarbase	MIMAT0000066	hsa-let-7e-5p	RAB19	401409	ENSG00000146955	HITS-CLIP
mirtarbase	MIMAT0000066	hsa-let-7e-5p	RAB19	401409	ENSG00000146955	HITS-CLIP
mirtarbase	MIMAT0000066	hsa-let-7e-5p	RAB19	401409	ENSG00000146955	HITS-CLIP
mirtarbase	MIMAT0000066	hsa-let-7e-5p	RAB19	401409	ENSG00000146955	HITS-CLIP
mirtarbase	MIMAT0000066	hsa-let-7e-5p	RAB19	401409	ENSG00000146955	HITS-CLIP
mirtarbase	MIMAT0000066	hsa-let-7e-5p	RAB19	401409	ENSG00000146955	PAR-CLIP
mirtarbase	MIMAT0000066	hsa-let-7e-5p	RPLP2	6181	ENSG00000177600	CLASH
mirtarbase	MIMAT0000066	hsa-let-7e-5p	RPLP2	6181	ENSG00000177600	CLASH
mirtarbase	MIMAT0000066	hsa-let-7e-5p	MT-ND3	4537	ENSG00000198840	CLASH
mirtarbase	MIMAT0000066	hsa-let-7e-5p	MT-ND3	4537	ENSG00000198840	CLASH
mirtarbase	MIMAT0000066	hsa-let-7e-5p	MT-ND4	4538	ENSG00000198886	CLASH
mirtarbase	MIMAT0000066	hsa-let-7e-5p	MT-ND4	4538	ENSG00000198886	CLASH
mirtarbase	MIMAT0000066	hsa-let-7e-5p	MT-ND1	4535	ENSG00000198888	CLASH
mirtarbase	MIMAT0000066	hsa-let-7e-5p	MT-ND1	4535	ENSG00000198888	CLASH
mirtarbase	MIMAT0000066	hsa-let-7e-5p	MT-ND2	4536	ENSG00000198763	CLASH
mirtarbase	MIMAT0000066	hsa-let-7e-5p	MT-ND2	4536	ENSG00000198763	CLASH
mirtarbase	MIMAT0000066	hsa-let-7e-5p	PRR5-ARHGAP8	553158	ENSG00000248405	PAR-CLIP
mirtarbase	MIMAT0000066	hsa-let-7e-5p	MT-ND5	4540	ENSG00000198786	CLASH
mirtarbase	MIMAT0000066	hsa-let-7e-5p	MT-ND5	4540	ENSG00000198786	CLASH
mirtarbase	MIMAT0000066	hsa-let-7e-5p	MT-CO1	4512	ENSG00000198804	CLASH
mirtarbase	MIMAT0000066	hsa-let-7e-5p	MT-CO1	4512	ENSG00000198804	CLASH
mirtarbase	MIMAT0000066	hsa-let-7e-5p	MT-ATP6	4508	ENSG00000198899	CLASH
mirtarbase	MIMAT0000066	hsa-let-7e-5p	MT-ATP6	4508	ENSG00000198899	CLASH
mirtarbase	MIMAT0000066	hsa-let-7e-5p	MT-CO3	4514	ENSG00000198938	CLASH
mirtarbase	MIMAT0000066	hsa-let-7e-5p	MT-CO3	4514	ENSG00000198938	CLASH
mirtarbase	MIMAT0000066	hsa-let-7e-5p	IRS4	8471	ENSG00000133124	CLASH
mirtarbase	MIMAT0000066	hsa-let-7e-5p	IRS4	8471	ENSG00000133124	CLASH
mirtarbase	MIMAT0000066	hsa-let-7e-5p	HLA-C	3107	ENSG00000206435	CLASH
mirtarbase	MIMAT0000066	hsa-let-7e-5p	HLA-C	3107	ENSG00000206435	CLASH
mirtarbase	MIMAT0000066	hsa-let-7e-5p	PBX2	5089	ENSG00000225987	PAR-CLIP
mirtarbase	MIMAT0000066	hsa-let-7e-5p	MAGEA3	4105	ENSG00000221867	PAR-CLIP
mirtarbase	MIMAT0000066	hsa-let-7e-5p	RABL2B	11159	ENSG00000079974	PAR-CLIP
mirtarbase	MIMAT0000066	hsa-let-7e-5p	RABL2B	11159	ENSG00000079974	PAR-CLIP
mirtarbase	MIMAT0000066	hsa-let-7e-5p	RABL2B	11159	ENSG00000079974	PAR-CLIP
mirtarbase	MIMAT0000066	hsa-let-7e-5p	RABL2B	11159	ENSG00000079974	PAR-CLIP
mirtarbase	MIMAT0000066	hsa-let-7e-5p	MIEF1	54471	ENSG00000100335	PAR-CLIP
mirtarbase	MIMAT0000066	hsa-let-7e-5p	MIEF1	54471	ENSG00000100335	PAR-CLIP
mirtarbase	MIMAT0000066	hsa-let-7e-5p	MIEF1	54471	ENSG00000100335	PAR-CLIP
mirtarbase	MIMAT0000066	hsa-let-7e-5p	MIEF1	54471	ENSG00000100335	PAR-CLIP
mirtarbase	MIMAT0000066	hsa-let-7e-5p	MIEF1	54471	ENSG00000100335	CLIP-Seq dataset analysis
mirtarbase	MIMAT0000066	hsa-let-7e-5p	MIEF1	54471	ENSG00000100335	CLIP-Seq dataset analysis
mirtarbase	MIMAT0000066	hsa-let-7e-5p	MIEF1	54471	ENSG00000100335	CLIP-Seq dataset analysis
mirtarbase	MIMAT0000066	hsa-let-7e-5p	MIEF1	54471	ENSG00000100335	CLIP-Seq dataset analysis
mirtarbase	MIMAT0000066	hsa-let-7e-5p	MIEF1	54471	ENSG00000100335	PAR-CLIP
mirtarbase	MIMAT0000066	hsa-let-7e-5p	MIEF1	54471	ENSG00000100335	PAR-CLIP
mirtarbase	MIMAT0000066	hsa-let-7e-5p	MIEF1	54471	ENSG00000100335	PAR-CLIP
mirtarbase	MIMAT0000066	hsa-let-7e-5p	MIEF1	54471	ENSG00000100335	PAR-CLIP
mirtarbase	MIMAT0000066	hsa-let-7e-5p	CXCL8	3576	ENSG00000169429	PAR-CLIP
mirtarbase	MIMAT0000066	hsa-let-7e-5p	POTEG	404785	ENSG00000187537	PAR-CLIP
mirtarbase	MIMAT0000066	hsa-let-7e-5p	POTEG	404785	ENSG00000187537	PAR-CLIP
mirtarbase	MIMAT0000066	hsa-let-7e-5p	PROSER3	148137	ENSG00000167595	CLIP-Seq dataset analysis
mirtarbase	MIMAT0000066	hsa-let-7e-5p	PROSER3	148137	ENSG00000167595	CLIP-Seq dataset analysis
mirtarbase	MIMAT0000066	hsa-let-7e-5p	PROSER3	148137	ENSG00000167595	CLIP-Seq dataset analysis
mirtarbase	MIMAT0000066	hsa-let-7e-5p	FOXD4L6	653404	ENSG00000273514	CLASH
mirtarbase	MIMAT0000066	hsa-let-7e-5p	FOXD4L6	653404	ENSG00000273514	CLASH
mirtarbase	MIMAT0000066	hsa-let-7e-5p	NEMP1	23306	ENSG00000166881	CLIP-Seq dataset analysis
mirtarbase	MIMAT0000066	hsa-let-7e-5p	POTEM	641455	ENSG00000222036	CLIP-Seq dataset analysis
mirtarbase	MIMAT0000066	hsa-let-7e-5p	POTEM	641455	ENSG00000222036	CLIP-Seq dataset analysis
mirtarbase	MIMAT0000066	hsa-let-7e-5p	POTEM	641455	ENSG00000222036	CLIP-Seq dataset analysis
mirtarbase	MIMAT0000066	hsa-let-7e-5p	POTEM	641455	ENSG00000222036	PAR-CLIP
mirtarbase	MIMAT0000066	hsa-let-7e-5p	POTEM	641455	ENSG00000222036	PAR-CLIP
mirtarbase	MIMAT0000066	hsa-let-7e-5p	GTF2I	2969	ENSG00000263001	CLASH
mirtarbase	MIMAT0000066	hsa-let-7e-5p	GTF2I	2969	ENSG00000263001	CLASH
mirtarbase	MIMAT0000066	hsa-let-7e-5p	OCLN	100506658	ENSG00000273814	CLASH
mirtarbase	MIMAT0000066	hsa-let-7e-5p	OCLN	100506658	ENSG00000273814	CLASH
mirtarbase	MIMAT0000066	hsa-let-7e-5p	SURF4	6836	ENSG00000280951	PAR-CLIP
mirtarbase	MIMAT0000066	hsa-let-7e-5p	SURF4	6836	ENSG00000280951	PAR-CLIP
mirtarbase	MIMAT0000066	hsa-let-7e-5p	RCC1L	81554	ENSG00000274523	CLASH
mirtarbase	MIMAT0000066	hsa-let-7e-5p	RCC1L	81554	ENSG00000274523	CLASH
mirtarbase	MIMAT0000066	hsa-let-7e-5p	RITA1	84934	ENSG00000139405	CLIP-Seq dataset analysis
mirtarbase	MIMAT0000066	hsa-let-7e-5p	ZKSCAN7	55888	ENSG00000281894	CLASH
mirtarbase	MIMAT0000066	hsa-let-7e-5p	ZKSCAN7	55888	ENSG00000281894	CLASH
mirtarbase	MIMAT0000066	hsa-let-7e-5p	GATB	5188	ENSG00000059691	CLASH
mirtarbase	MIMAT0000066	hsa-let-7e-5p	GATB	5188	ENSG00000059691	CLASH
mirtarbase	MIMAT0000066	hsa-let-7e-5p	PRPF8	10594	ENSG00000274442	CLASH
mirtarbase	MIMAT0000066	hsa-let-7e-5p	PRPF8	10594	ENSG00000274442	CLASH
mirtarbase	MIMAT0000066	hsa-let-7e-5p	SLC12A7	10723	ENSG00000276482	PAR-CLIP
mirtarbase	MIMAT0000066	hsa-let-7e-5p	SLC12A7	10723	ENSG00000276482	PAR-CLIP
mirtarbase	MIMAT0000066	hsa-let-7e-5p	YWHAE	7531	ENSG00000274474	CLASH
mirtarbase	MIMAT0000066	hsa-let-7e-5p	YWHAE	7531	ENSG00000274474	CLASH
mirtarbase	MIMAT0000066	hsa-let-7e-5p	NOCT	25819	ENSG00000151014	CLASH
mirtarbase	MIMAT0000066	hsa-let-7e-5p	NOCT	25819	ENSG00000151014	CLASH
mirtarbase	MIMAT0000066	hsa-let-7e-5p	ERO1A	30001	ENSG00000197930	PAR-CLIP
mirtarbase	MIMAT0000066	hsa-let-7e-5p	SOCS7	30837	ENSG00000274229	PAR-CLIP
mirtarbase	MIMAT0000066	hsa-let-7e-5p	TRMO	51531	ENSG00000136932	PAR-CLIP
mirtarbase	MIMAT0000066	hsa-let-7e-5p	TRMO	51531	ENSG00000136932	PAR-CLIP
mirtarbase	MIMAT0000066	hsa-let-7e-5p	KIAA1143	57456	ENSG00000281665	PAR-CLIP
mirtarbase	MIMAT0000066	hsa-let-7e-5p	ZNF8	7554	ENSG00000278129	PAR-CLIP
mirtarbase	MIMAT0000066	hsa-let-7e-5p	ZNF8	7554	ENSG00000278129	PAR-CLIP
mirtarbase	MIMAT0000066	hsa-let-7e-5p	PRSS22	64063	ENSG00000282937	HITS-CLIP
mirtarbase	MIMAT0000066	hsa-let-7e-5p	PRSS22	64063	ENSG00000282937	HITS-CLIP
mirtarbase	MIMAT0000066	hsa-let-7e-5p	ZCCHC3	85364	ENSG00000247315	PAR-CLIP
mirtarbase	MIMAT0000066	hsa-let-7e-5p	ZCCHC3	85364	ENSG00000247315	PAR-CLIP
mirtarbase	MIMAT0000066	hsa-let-7e-5p	ZCCHC3	85364	ENSG00000247315	PAR-CLIP
mirtarbase	MIMAT0000066	hsa-let-7e-5p	ZCCHC3	85364	ENSG00000247315	PAR-CLIP
mirtarbase	MIMAT0000066	hsa-let-7e-5p	GPAT4	137964	ENSG00000158669	PAR-CLIP
mirtarbase	MIMAT0000066	hsa-let-7e-5p	OPRL1	4987	ENSG00000277044	PAR-CLIP
mirtarbase	MIMAT0000066	hsa-let-7e-5p	OPRL1	4987	ENSG00000277044	PAR-CLIP
mirtarbase	MIMAT0000066	hsa-let-7e-5p	NKAPD1	55216	ENSG00000150776	PAR-CLIP
mirtarbase	MIMAT0000066	hsa-let-7e-5p	NKAPD1	55216	ENSG00000150776	PAR-CLIP
mirtarbase	MIMAT0000066	hsa-let-7e-5p	NKAPD1	55216	ENSG00000150776	PAR-CLIP
mirtarbase	MIMAT0000066	hsa-let-7e-5p	NKAPD1	55216	ENSG00000150776	PAR-CLIP
mirtarbase	MIMAT0000066	hsa-let-7e-5p	TENT2	167153	ENSG00000164329	CLASH
mirtarbase	MIMAT0000066	hsa-let-7e-5p	TENT2	167153	ENSG00000164329	CLASH
mirtarbase	MIMAT0000066	hsa-let-7e-5p	CASTOR2	729438	ENSG00000274070	PAR-CLIP
mirtarbase	MIMAT0000066	hsa-let-7e-5p	H2BC18	440689	ENSG00000203814	CLASH
mirtarbase	MIMAT0000066	hsa-let-7e-5p	H2BC18	440689	ENSG00000203814	CLASH
mirtarbase	MIMAT0000066	hsa-let-7e-5p	PRORP	9692	ENSG00000100890	PAR-CLIP
mirtarbase	MIMAT0000066	hsa-let-7e-5p	PRORP	9692	ENSG00000100890	PAR-CLIP
mirtarbase	MIMAT0000066	hsa-let-7e-5p	YAE1	57002	ENSG00000241127	PAR-CLIP
mirtarbase	MIMAT0000066	hsa-let-7e-5p	YAE1	57002	ENSG00000241127	PAR-CLIP
mirtarbase	MIMAT0000066	hsa-let-7e-5p	PRAMEF13	400736	ENSG00000282741	CLASH
mirtarbase	MIMAT0000066	hsa-let-7e-5p	PRAMEF13	400736	ENSG00000282741	CLASH
mirtarbase	MIMAT0000066	hsa-let-7e-5p	MARCHF5	54708	ENSG00000198060	CLASH
mirtarbase	MIMAT0000066	hsa-let-7e-5p	MARCHF5	54708	ENSG00000198060	CLASH
mirtarbase	MIMAT0000066	hsa-let-7e-5p	OTULINL	54491	ENSG00000145569	PAR-CLIP//HITS-CLIP
mirtarbase	MIMAT0000066	hsa-let-7e-5p	OTULINL	54491	ENSG00000145569	PAR-CLIP//HITS-CLIP
mirtarbase	MIMAT0000066	hsa-let-7e-5p	OTULINL	54491	ENSG00000145569	PAR-CLIP//HITS-CLIP
mirtarbase	MIMAT0000066	hsa-let-7e-5p	OTULINL	54491	ENSG00000145569	PAR-CLIP
mirtarbase	MIMAT0000066	hsa-let-7e-5p	OTULINL	54491	ENSG00000145569	PAR-CLIP
mirtarbase	MIMAT0000066	hsa-let-7e-5p	OTULINL	54491	ENSG00000145569	HITS-CLIP
mirtarbase	MIMAT0000066	hsa-let-7e-5p	ADIPOR2	79602	ENSG00000285070	PAR-CLIP
mirtarbase	MIMAT0000066	hsa-let-7e-5p	ADIPOR2	79602	ENSG00000285070	PAR-CLIP
mirtarbase	MIMAT0000066	hsa-let-7e-5p	HASPIN	83903	ENSG00000177602	PAR-CLIP//HITS-CLIP
mirtarbase	MIMAT0000066	hsa-let-7e-5p	HASPIN	83903	ENSG00000177602	PAR-CLIP//HITS-CLIP
mirtarbase	MIMAT0000066	hsa-let-7e-5p	HASPIN	83903	ENSG00000177602	PAR-CLIP//HITS-CLIP
mirtarbase	MIMAT0000066	hsa-let-7e-5p	HASPIN	83903	ENSG00000177602	PAR-CLIP
mirtarbase	MIMAT0000066	hsa-let-7e-5p	HASPIN	83903	ENSG00000177602	PAR-CLIP
mirtarbase	MIMAT0000066	hsa-let-7e-5p	HASPIN	83903	ENSG00000177602	HITS-CLIP
mirtarbase	MIMAT0000066	hsa-let-7e-5p	H2BC12	85236	ENSG00000197903	PAR-CLIP
mirtarbase	MIMAT0000066	hsa-let-7e-5p	H2BC12	85236	ENSG00000197903	PAR-CLIP
mirtarbase	MIMAT0000066	hsa-let-7e-5p	H2BC12	85236	ENSG00000197903	PAR-CLIP
mirtarbase	MIMAT0000066	hsa-let-7e-5p	H2BC12	85236	ENSG00000197903	PAR-CLIP
mirtarbase	MIMAT0000066	hsa-let-7e-5p	H2BC5	3017	ENSG00000158373	PAR-CLIP
mirtarbase	MIMAT0000066	hsa-let-7e-5p	H2BC5	3017	ENSG00000158373	PAR-CLIP
mirtarbase	MIMAT0000066	hsa-let-7e-5p	H2BC5	3017	ENSG00000158373	PAR-CLIP
mirtarbase	MIMAT0000066	hsa-let-7e-5p	H2BC5	3017	ENSG00000158373	PAR-CLIP
mirtarbase	MIMAT0000066	hsa-let-7e-5p	SMCR8	140775	ENSG00000283741	PAR-CLIP
mirtarbase	MIMAT0000066	hsa-let-7e-5p	SMCR8	140775	ENSG00000283741	PAR-CLIP
mirtarbase	MIMAT0000066	hsa-let-7e-5p	SMCR8	140775	ENSG00000283741	PAR-CLIP
mirtarbase	MIMAT0000066	hsa-let-7e-5p	SMCR8	140775	ENSG00000283741	PAR-CLIP
mirtarbase	MIMAT0000066	hsa-let-7e-5p	SMCR8	140775	ENSG00000283741	PAR-CLIP
mirtarbase	MIMAT0000066	hsa-let-7e-5p	SMCR8	140775	ENSG00000283741	PAR-CLIP
mirtarbase	MIMAT0000066	hsa-let-7e-5p	SMCR8	140775	ENSG00000283741	PAR-CLIP
mirtarbase	MIMAT0000066	hsa-let-7e-5p	SMCR8	140775	ENSG00000283741	PAR-CLIP
mirtarbase	MIMAT0000066	hsa-let-7e-5p	SMCR8	140775	ENSG00000283741	PAR-CLIP
mirtarbase	MIMAT0000066	hsa-let-7e-5p	SMCR8	140775	ENSG00000283741	PAR-CLIP
mirtarbase	MIMAT0000066	hsa-let-7e-5p	BLTP2	9703	ENSG00000007202	CLASH
mirtarbase	MIMAT0000066	hsa-let-7e-5p	BLTP2	9703	ENSG00000007202	CLASH
mirtarbase	MIMAT0000066	hsa-let-7e-5p	BLTP3A	54887	ENSG00000065060	CLASH
mirtarbase	MIMAT0000066	hsa-let-7e-5p	BLTP3A	54887	ENSG00000065060	CLASH
mirtarbase	MIMAT0000066	hsa-let-7e-5p	SPRING1	79794	ENSG00000111412	CLASH
mirtarbase	MIMAT0000066	hsa-let-7e-5p	SPRING1	79794	ENSG00000111412	CLASH
mirtarbase	MIMAT0000066	hsa-let-7e-5p	VCF1	84923	ENSG00000133193	PAR-CLIP
mirtarbase	MIMAT0000066	hsa-let-7e-5p	VCF1	84923	ENSG00000133193	PAR-CLIP
mirtarbase	MIMAT0000066	hsa-let-7e-5p	FHIP2A	57700	ENSG00000151553	CLASH
mirtarbase	MIMAT0000066	hsa-let-7e-5p	FHIP2A	57700	ENSG00000151553	CLASH
mirtarbase	MIMAT0000066	hsa-let-7e-5p	MIDEAS	91748	ENSG00000156030	CLASH
mirtarbase	MIMAT0000066	hsa-let-7e-5p	MIDEAS	91748	ENSG00000156030	CLASH
mirtarbase	MIMAT0000066	hsa-let-7e-5p	ZNF738	148203	ENSG00000172687	HITS-CLIP
mirtarbase	MIMAT0000066	hsa-let-7e-5p	ZNF738	148203	ENSG00000172687	HITS-CLIP
mirtarbase	MIMAT0000066	hsa-let-7e-5p	VARS1	7407	ENSG00000204394	CLASH
mirtarbase	MIMAT0000066	hsa-let-7e-5p	VARS1	7407	ENSG00000204394	CLASH
mirtarbase	MIMAT0000066	hsa-let-7e-5p	RIMOC1	285636	ENSG00000205765	PAR-CLIP
mirtarbase	MIMAT0000066	hsa-let-7e-5p	RIMOC1	285636	ENSG00000205765	PAR-CLIP
mirtarbase	MIMAT0000066	hsa-let-7e-5p	RIMOC1	285636	ENSG00000205765	PAR-CLIP
mirtarbase	MIMAT0000066	hsa-let-7e-5p	RIMOC1	285636	ENSG00000205765	PAR-CLIP
mirtarbase	MIMAT0000066	hsa-let-7e-5p	RIMOC1	285636	ENSG00000205765	PAR-CLIP
mirtarbase	MIMAT0000066	hsa-let-7e-5p	RIMOC1	285636	ENSG00000205765	PAR-CLIP
mirtarbase	MIMAT0000066	hsa-let-7e-5p	RIMOC1	285636	ENSG00000205765	PAR-CLIP
mirtarbase	MIMAT0000066	hsa-let-7e-5p	RIMOC1	285636	ENSG00000205765	PAR-CLIP
mirtarbase	MIMAT0000066	hsa-let-7e-5p	RIMOC1	285636	ENSG00000205765	PAR-CLIP
mirtarbase	MIMAT0000066	hsa-let-7e-5p	RIMOC1	285636	ENSG00000205765	PAR-CLIP
mirtarbase	MIMAT0000066	hsa-let-7e-5p	RIMOC1	285636	ENSG00000205765	PAR-CLIP
mirtarbase	MIMAT0000066	hsa-let-7e-5p	RIMOC1	285636	ENSG00000205765	PAR-CLIP
mirtarbase	MIMAT0000066	hsa-let-7e-5p	RIMOC1	285636	ENSG00000205765	PAR-CLIP
mirtarbase	MIMAT0000066	hsa-let-7e-5p	RIMOC1	285636	ENSG00000205765	PAR-CLIP
mirtarbase	MIMAT0000066	hsa-let-7e-5p	SOD2	6648	ENSG00000291237	PAR-CLIP
mirtarbase	MIMAT0000066	hsa-let-7e-5p	SOD2	6648	ENSG00000291237	PAR-CLIP
mirtarbase	MIMAT0000066	hsa-let-7e-5p	SNHG12	85028	ENSG00000197989	Luciferase reporter assay//qRT-PCR
mirtarbase	MIMAT0000066	hsa-let-7e-5p				PAR-CLIP
mirtarbase	MIMAT0000066	hsa-let-7e-5p				PAR-CLIP
mirtarbase	MIMAT0000066	hsa-let-7e-5p				PAR-CLIP
mirtarbase	MIMAT0000066	hsa-let-7e-5p				PAR-CLIP
mirtarbase	MIMAT0000066	hsa-let-7e-5p				PAR-CLIP
mirtarbase	MIMAT0000066	hsa-let-7e-5p	TRIM71	131405	ENSG00000291501	PAR-CLIP
mirtarbase	MIMAT0000066	hsa-let-7e-5p	TRIM71	131405	ENSG00000291501	PAR-CLIP
mirtarbase	MIMAT0000066	hsa-let-7e-5p	MEF2D	4209	ENSG00000291761	PAR-CLIP
mirtarbase	MIMAT0000066	hsa-let-7e-5p	RPN2	6185	ENSG00000291973	CLASH
mirtarbase	MIMAT0000066	hsa-let-7e-5p	RPN2	6185	ENSG00000291973	CLASH
mirtarbase	MIMAT0000066	hsa-let-7e-5p	TGOLN2	10618	ENSG00000292253	PAR-CLIP
mirtarbase	MIMAT0000066	hsa-let-7e-5p	TGOLN2	10618	ENSG00000292253	PAR-CLIP
mirtarbase	MIMAT0000066	hsa-let-7e-5p	ABT1	29777	ENSG00000292169	PAR-CLIP//HITS-CLIP
mirtarbase	MIMAT0000066	hsa-let-7e-5p	ABT1	29777	ENSG00000292169	PAR-CLIP//HITS-CLIP
mirtarbase	MIMAT0000066	hsa-let-7e-5p	ABT1	29777	ENSG00000292169	PAR-CLIP//HITS-CLIP
mirtarbase	MIMAT0000066	hsa-let-7e-5p	ABT1	29777	ENSG00000292169	PAR-CLIP//HITS-CLIP
mirtarbase	MIMAT0000066	hsa-let-7e-5p	ABT1	29777	ENSG00000292169	PAR-CLIP//HITS-CLIP
mirtarbase	MIMAT0000066	hsa-let-7e-5p	ABT1	29777	ENSG00000292169	PAR-CLIP
mirtarbase	MIMAT0000066	hsa-let-7e-5p	ABT1	29777	ENSG00000292169	PAR-CLIP
mirtarbase	MIMAT0000066	hsa-let-7e-5p	ABT1	29777	ENSG00000292169	PAR-CLIP
mirtarbase	MIMAT0000066	hsa-let-7e-5p	ABT1	29777	ENSG00000292169	HITS-CLIP
mirtarbase	MIMAT0000066	hsa-let-7e-5p	ABT1	29777	ENSG00000292169	PAR-CLIP
mirtarbase	MIMAT0000066	hsa-let-7e-5p	PLCXD1	55344	ENSG00000292344	CLASH
mirtarbase	MIMAT0000066	hsa-let-7e-5p	PLCXD1	55344	ENSG00000292344	CLASH
mirtarbase	MIMAT0000066	hsa-let-7e-5p	MTCH2	23788	ENSG00000285121	CLASH
mirtarbase	MIMAT0000066	hsa-let-7e-5p	MTCH2	23788	ENSG00000285121	CLASH
mirtarbase	MIMAT0000066	hsa-let-7e-5p	EIF4A3	9775	ENSG00000291508	HITS-CLIP
mirtarbase	MIMAT0000066	hsa-let-7e-5p	EIF4A3	9775	ENSG00000291508	HITS-CLIP
mirtarbase	MIMAT0000066	hsa-let-7e-5p	GARRE1	9710	ENSG00000279389	CLASH
mirtarbase	MIMAT0000066	hsa-let-7e-5p	GARRE1	9710	ENSG00000279389	CLASH
mirtarbase	MIMAT0000066	hsa-let-7e-5p	BAHCC1	57597	ENSG00000291421	CLASH
mirtarbase	MIMAT0000066	hsa-let-7e-5p	BAHCC1	57597	ENSG00000291421	CLASH
mirtarbase	MIMAT0000066	hsa-let-7e-5p	NDUFA3	4696	ENSG00000274359	CLASH
mirtarbase	MIMAT0000066	hsa-let-7e-5p	NDUFA3	4696	ENSG00000274359	CLASH
mirtarbase	MIMAT0000066	hsa-let-7e-5p	SKIC2	6499	ENSG00000228896	CLASH
mirtarbase	MIMAT0000066	hsa-let-7e-5p	SKIC2	6499	ENSG00000228896	CLASH
mirtarbase	MIMAT0000066	hsa-let-7e-5p	CENPP	401541	ENSG00000291348	CLASH
mirtarbase	MIMAT0000066	hsa-let-7e-5p	CENPP	401541	ENSG00000291348	CLASH
mirtarbase	MIMAT0000066	hsa-let-7e-5p		84798	ENSG00000293495	CLASH
mirtarbase	MIMAT0000066	hsa-let-7e-5p		84798	ENSG00000293495	CLASH
mirtarbase	MIMAT0000066	hsa-let-7e-5p	C1RL	51279	ENSG00000288124	PAR-CLIP
mirtarbase	MIMAT0000066	hsa-let-7e-5p	C1RL	51279	ENSG00000288124	PAR-CLIP
mirtarbase	MIMAT0000257	hsa-miR-181b-5p	BCL2	596	ENSG00000171791	Luciferase reporter assay//qRT-PCR//Western blot//Reporter assay;Western blot;Other//ELISA//GFP reporter assay
mirtarbase	MIMAT0000257	hsa-miR-181b-5p	BCL2	596	ENSG00000171791	Luciferase reporter assay//qRT-PCR//Western blot//Reporter assay;Western blot;Other//ELISA//GFP reporter assay
mirtarbase	MIMAT0000257	hsa-miR-181b-5p	BCL2	596	ENSG00000171791	Luciferase reporter assay//qRT-PCR//Western blot//Reporter assay;Western blot;Other//ELISA//GFP reporter assay
mirtarbase	MIMAT0000257	hsa-miR-181b-5p	BCL2	596	ENSG00000171791	Luciferase reporter assay//qRT-PCR//Western blot//Reporter assay;Western blot;Other
mirtarbase	MIMAT0000257	hsa-miR-181b-5p	BCL2	596	ENSG00000171791	Luciferase reporter assay
mirtarbase	MIMAT0000257	hsa-miR-181b-5p	BCL2	596	ENSG00000171791	ELISA//GFP reporter assay//Luciferase reporter assay//qRT-PCR//Western blot
mirtarbase	MIMAT0000257	hsa-miR-181b-5p	NFIA	4774	ENSG00000162599	Flow//Western blot
mirtarbase	MIMAT0000257	hsa-miR-181b-5p	NFIA	4774	ENSG00000162599	Flow//Western blot
mirtarbase	MIMAT0000257	hsa-miR-181b-5p	NCOA3	8202	ENSG00000124151	HITS-CLIP
mirtarbase	MIMAT0000257	hsa-miR-181b-5p	NCOA3	8202	ENSG00000124151	HITS-CLIP
mirtarbase	MIMAT0000257	hsa-miR-181b-5p	TCL1A	8115	ENSG00000100721	Luciferase reporter assay//Microarray//qRT-PCR//Western blot//Other
mirtarbase	MIMAT0000257	hsa-miR-181b-5p	TCL1A	8115	ENSG00000100721	Luciferase reporter assay//Microarray//qRT-PCR//Western blot//Other
mirtarbase	MIMAT0000257	hsa-miR-181b-5p	TCL1A	8115	ENSG00000100721	Luciferase reporter assay//Microarray//qRT-PCR//Western blot
mirtarbase	MIMAT0000257	hsa-miR-181b-5p	MCL1	4170	ENSG00000143384	Luciferase reporter assay
mirtarbase	MIMAT0000257	hsa-miR-181b-5p	MCL1	4170	ENSG00000143384	Luciferase reporter assay
mirtarbase	MIMAT0000257	hsa-miR-181b-5p	E2F1	1869	ENSG00000101412	Luciferase reporter assay//Western blot//CLASH
mirtarbase	MIMAT0000257	hsa-miR-181b-5p	E2F1	1869	ENSG00000101412	Luciferase reporter assay//Western blot//CLASH
mirtarbase	MIMAT0000257	hsa-miR-181b-5p	E2F1	1869	ENSG00000101412	Luciferase reporter assay//Western blot
mirtarbase	MIMAT0000257	hsa-miR-181b-5p	E2F1	1869	ENSG00000101412	CLASH
mirtarbase	MIMAT0000257	hsa-miR-181b-5p	LATS2	26524	ENSG00000150457	Luciferase reporter assay//qRT-PCR//Western blot
mirtarbase	MIMAT0000257	hsa-miR-181b-5p	LATS2	26524	ENSG00000150457	Luciferase reporter assay//qRT-PCR//Western blot
mirtarbase	MIMAT0000257	hsa-miR-181b-5p	PLAG1	5324	ENSG00000181690	Western blot//Luciferase reporter assay//Microarray//Other
mirtarbase	MIMAT0000257	hsa-miR-181b-5p	PLAG1	5324	ENSG00000181690	Western blot//Luciferase reporter assay//Microarray
mirtarbase	MIMAT0000257	hsa-miR-181b-5p	RHOG	391	ENSG00000177105	HITS-CLIP
mirtarbase	MIMAT0000257	hsa-miR-181b-5p	RHOG	391	ENSG00000177105	HITS-CLIP
mirtarbase	MIMAT0000257	hsa-miR-181b-5p	CAPRIN2	65981	ENSG00000110888	PAR-CLIP
mirtarbase	MIMAT0000257	hsa-miR-181b-5p	CAPRIN2	65981	ENSG00000110888	PAR-CLIP
mirtarbase	MIMAT0000257	hsa-miR-181b-5p	CAPRIN2	65981	ENSG00000110888	PAR-CLIP
mirtarbase	MIMAT0000257	hsa-miR-181b-5p	CAPRIN2	65981	ENSG00000110888	PAR-CLIP
mirtarbase	MIMAT0000257	hsa-miR-181b-5p	ZFP36L2	678	ENSG00000152518	HITS-CLIP
mirtarbase	MIMAT0000257	hsa-miR-181b-5p	ZFP36L2	678	ENSG00000152518	HITS-CLIP
mirtarbase	MIMAT0000257	hsa-miR-181b-5p	TIMP3	7078	ENSG00000100234	Luciferase reporter assay//qRT-PCR//Western blot//Immunohistochemistry//In situ hybridization//Other//Northern blot
mirtarbase	MIMAT0000257	hsa-miR-181b-5p	TIMP3	7078	ENSG00000100234	Luciferase reporter assay//qRT-PCR//Western blot//Immunohistochemistry//In situ hybridization//Other//Northern blot
mirtarbase	MIMAT0000257	hsa-miR-181b-5p	TIMP3	7078	ENSG00000100234	Luciferase reporter assay//qRT-PCR//Western blot//Immunohistochemistry//In situ hybridization//Other//Northern blot
mirtarbase	MIMAT0000257	hsa-miR-181b-5p	TIMP3	7078	ENSG00000100234	Luciferase reporter assay//qRT-PCR//Western blot//Immunohistochemistry//In situ hybridization//Other//Northern blot
mirtarbase	MIMAT0000257	hsa-miR-181b-5p	TIMP3	7078	ENSG00000100234	Luciferase reporter assay//qRT-PCR//Western blot//Immunohistochemistry//In situ hybridization//Other//Northern blot
mirtarbase	MIMAT0000257	hsa-miR-181b-5p	TIMP3	7078	ENSG00000100234	Luciferase reporter assay//qRT-PCR//Western blot
mirtarbase	MIMAT0000257	hsa-miR-181b-5p	TIMP3	7078	ENSG00000100234	Immunohistochemistry//In situ hybridization//qRT-PCR//Western blot
mirtarbase	MIMAT0000257	hsa-miR-181b-5p	TIMP3	7078	ENSG00000100234	Northern blot//qRT-PCR//Western blot
mirtarbase	MIMAT0000257	hsa-miR-181b-5p	TIMP3	7078	ENSG00000100234	Immunofluorescence//Luciferase reporter assay//qRT-PCR//Western blot
mirtarbase	MIMAT0000257	hsa-miR-181b-5p	PDCD4	27250	ENSG00000150593	Luciferase reporter assay//qRT-PCR//Western blot
mirtarbase	MIMAT0000257	hsa-miR-181b-5p	XPNPEP3	63929	ENSG00000196236	PAR-CLIP
mirtarbase	MIMAT0000257	hsa-miR-181b-5p	XPNPEP3	63929	ENSG00000196236	PAR-CLIP
mirtarbase	MIMAT0000257	hsa-miR-181b-5p	OSBPL8	114882	ENSG00000091039	CLASH
mirtarbase	MIMAT0000257	hsa-miR-181b-5p	OSBPL8	114882	ENSG00000091039	CLASH
mirtarbase	MIMAT0000257	hsa-miR-181b-5p	ESR1	2099	ENSG00000091831	Other
mirtarbase	MIMAT0000257	hsa-miR-181b-5p	SLC7A1	6541	ENSG00000139514	HITS-CLIP
mirtarbase	MIMAT0000257	hsa-miR-181b-5p	SLC7A1	6541	ENSG00000139514	HITS-CLIP
mirtarbase	MIMAT0000257	hsa-miR-181b-5p	VSNL1	7447	ENSG00000163032	Luciferase assay/RT-PCR//Luciferase reporter assay//Other//Reporter assay;Other
mirtarbase	MIMAT0000257	hsa-miR-181b-5p	VSNL1	7447	ENSG00000163032	Luciferase assay/RT-PCR//Reporter assay;Other
mirtarbase	MIMAT0000257	hsa-miR-181b-5p	GRIA2	2891	ENSG00000120251	Luciferase assay/RT-PCR//Luciferase reporter assay//Other//Reporter assay;Other
mirtarbase	MIMAT0000257	hsa-miR-181b-5p	GRIA2	2891	ENSG00000120251	Luciferase assay/RT-PCR//Reporter assay;Other
mirtarbase	MIMAT0000257	hsa-miR-181b-5p	VCAM1	7412	ENSG00000162692	HITS-CLIP
mirtarbase	MIMAT0000257	hsa-miR-181b-5p	VCAM1	7412	ENSG00000162692	HITS-CLIP
mirtarbase	MIMAT0000257	hsa-miR-181b-5p	FAM3C	10447	ENSG00000196937	PAR-CLIP
mirtarbase	MIMAT0000257	hsa-miR-181b-5p	FAM3C	10447	ENSG00000196937	PAR-CLIP
mirtarbase	MIMAT0000257	hsa-miR-181b-5p	BMPR2	659	ENSG00000204217	HITS-CLIP
mirtarbase	MIMAT0000257	hsa-miR-181b-5p	BMPR2	659	ENSG00000204217	HITS-CLIP
mirtarbase	MIMAT0000257	hsa-miR-181b-5p	RP2	6102	ENSG00000102218	HITS-CLIP
mirtarbase	MIMAT0000257	hsa-miR-181b-5p	RP2	6102	ENSG00000102218	HITS-CLIP
mirtarbase	MIMAT0000257	hsa-miR-181b-5p	HMGA2	8091	ENSG00000149948	PAR-CLIP
mirtarbase	MIMAT0000257	hsa-miR-181b-5p	HMGA2	8091	ENSG00000149948	PAR-CLIP
mirtarbase	MIMAT0000257	hsa-miR-181b-5p	HMGA2	8091	ENSG00000149948	PAR-CLIP
mirtarbase	MIMAT0000257	hsa-miR-181b-5p	HMGA2	8091	ENSG00000149948	PAR-CLIP
mirtarbase	MIMAT0000257	hsa-miR-181b-5p	CCNG1	900	ENSG00000113328	PAR-CLIP
mirtarbase	MIMAT0000257	hsa-miR-181b-5p	CCNG1	900	ENSG00000113328	PAR-CLIP
mirtarbase	MIMAT0000257	hsa-miR-181b-5p	DNAJB11	51726	ENSG00000090520	CLASH
mirtarbase	MIMAT0000257	hsa-miR-181b-5p	DNAJB11	51726	ENSG00000090520	CLASH
mirtarbase	MIMAT0000257	hsa-miR-181b-5p	HMGB1	3146	ENSG00000189403	Luciferase reporter assay//qRT-PCR//Western blot
mirtarbase	MIMAT0000257	hsa-miR-181b-5p	STX2	2054	ENSG00000111450	HITS-CLIP
mirtarbase	MIMAT0000257	hsa-miR-181b-5p	STX2	2054	ENSG00000111450	HITS-CLIP
mirtarbase	MIMAT0000257	hsa-miR-181b-5p	ALDH9A1	223	ENSG00000143149	HITS-CLIP
mirtarbase	MIMAT0000257	hsa-miR-181b-5p	ALDH9A1	223	ENSG00000143149	HITS-CLIP
mirtarbase	MIMAT0000257	hsa-miR-181b-5p	NIN	51199	ENSG00000100503	HITS-CLIP
mirtarbase	MIMAT0000257	hsa-miR-181b-5p	NIN	51199	ENSG00000100503	HITS-CLIP
mirtarbase	MIMAT0000257	hsa-miR-181b-5p	HSP90B1	7184	ENSG00000166598	PAR-CLIP
mirtarbase	MIMAT0000257	hsa-miR-181b-5p	HSP90B1	7184	ENSG00000166598	PAR-CLIP
mirtarbase	MIMAT0000257	hsa-miR-181b-5p	HSP90B1	7184	ENSG00000166598	PAR-CLIP
mirtarbase	MIMAT0000257	hsa-miR-181b-5p	HSP90B1	7184	ENSG00000166598	PAR-CLIP
mirtarbase	MIMAT0000257	hsa-miR-181b-5p	CBX7	23492	ENSG00000100307	Luciferase reporter assay
mirtarbase	MIMAT0000257	hsa-miR-181b-5p	CBX7	23492	ENSG00000100307	Luciferase reporter assay
mirtarbase	MIMAT0000257	hsa-miR-181b-5p	SIRT1	23411	ENSG00000096717	Luciferase reporter assay
mirtarbase	MIMAT0000257	hsa-miR-181b-5p	SIRT1	23411	ENSG00000096717	Luciferase reporter assay
mirtarbase	MIMAT0000257	hsa-miR-181b-5p	BCL2L11	10018	ENSG00000153094	Luciferase reporter assay//qRT-PCR//Western blot
mirtarbase	MIMAT0000257	hsa-miR-181b-5p	TAF6L	10629	ENSG00000162227	Other
mirtarbase	MIMAT0000257	hsa-miR-181b-5p	TSG101	7251	ENSG00000074319	HITS-CLIP
mirtarbase	MIMAT0000257	hsa-miR-181b-5p	TSG101	7251	ENSG00000074319	HITS-CLIP
mirtarbase	MIMAT0000257	hsa-miR-181b-5p	RCOR1	23186	ENSG00000089902	HITS-CLIP
mirtarbase	MIMAT0000257	hsa-miR-181b-5p	RCOR1	23186	ENSG00000089902	HITS-CLIP
mirtarbase	MIMAT0000257	hsa-miR-181b-5p	ETS1	2113	ENSG00000134954	HITS-CLIP
mirtarbase	MIMAT0000257	hsa-miR-181b-5p	ETS1	2113	ENSG00000134954	HITS-CLIP
mirtarbase	MIMAT0000257	hsa-miR-181b-5p	ETS1	2113	ENSG00000134954	HITS-CLIP
mirtarbase	MIMAT0000257	hsa-miR-181b-5p	ETS1	2113	ENSG00000134954	HITS-CLIP
mirtarbase	MIMAT0000257	hsa-miR-181b-5p	ETS1	2113	ENSG00000134954	HITS-CLIP
mirtarbase	MIMAT0000257	hsa-miR-181b-5p	ETS1	2113	ENSG00000134954	HITS-CLIP
mirtarbase	MIMAT0000257	hsa-miR-181b-5p	ETS1	2113	ENSG00000134954	HITS-CLIP
mirtarbase	MIMAT0000257	hsa-miR-181b-5p	ETS1	2113	ENSG00000134954	HITS-CLIP
mirtarbase	MIMAT0000257	hsa-miR-181b-5p	CREB1	1385	ENSG00000118260	GFP reporter assay//qRT-PCR//Western blot
mirtarbase	MIMAT0000257	hsa-miR-181b-5p	CREB1	1385	ENSG00000118260	GFP reporter assay//qRT-PCR//Western blot
mirtarbase	MIMAT0000257	hsa-miR-181b-5p	ATP2B1	490	ENSG00000070961	HITS-CLIP
mirtarbase	MIMAT0000257	hsa-miR-181b-5p	ATP2B1	490	ENSG00000070961	HITS-CLIP
mirtarbase	MIMAT0000257	hsa-miR-181b-5p	MAP2K1	5604	ENSG00000169032	Luciferase reporter assay
mirtarbase	MIMAT0000257	hsa-miR-181b-5p	MAP2K1	5604	ENSG00000169032	Luciferase reporter assay
mirtarbase	MIMAT0000257	hsa-miR-181b-5p	FOS	2353	ENSG00000170345	Immunohistochemistry//In situ hybridization//Luciferase reporter assay//Microarray//qRT-PCR//Western blot
mirtarbase	MIMAT0000257	hsa-miR-181b-5p	FOS	2353	ENSG00000170345	Immunohistochemistry//In situ hybridization//Luciferase reporter assay//Microarray//qRT-PCR//Western blot
mirtarbase	MIMAT0000257	hsa-miR-181b-5p	LDLR	3949	ENSG00000130164	HITS-CLIP
mirtarbase	MIMAT0000257	hsa-miR-181b-5p	LDLR	3949	ENSG00000130164	HITS-CLIP
mirtarbase	MIMAT0000257	hsa-miR-181b-5p	DDIT4	54541	ENSG00000168209	PAR-CLIP
mirtarbase	MIMAT0000257	hsa-miR-181b-5p	DDIT4	54541	ENSG00000168209	PAR-CLIP
mirtarbase	MIMAT0000257	hsa-miR-181b-5p	DDIT4	54541	ENSG00000168209	PAR-CLIP
mirtarbase	MIMAT0000257	hsa-miR-181b-5p	FGFR1	2260	ENSG00000077782	CLASH
mirtarbase	MIMAT0000257	hsa-miR-181b-5p	FGFR1	2260	ENSG00000077782	CLASH
mirtarbase	MIMAT0000257	hsa-miR-181b-5p	CDX2	1045	ENSG00000165556	Luciferase reporter assay//Other
mirtarbase	MIMAT0000257	hsa-miR-181b-5p	CDX2	1045	ENSG00000165556	Luciferase reporter assay
mirtarbase	MIMAT0000257	hsa-miR-181b-5p	GATA6	2627	ENSG00000141448	Luciferase reporter assay//Other
mirtarbase	MIMAT0000257	hsa-miR-181b-5p	GATA6	2627	ENSG00000141448	Luciferase reporter assay//Other
mirtarbase	MIMAT0000257	hsa-miR-181b-5p	GATA6	2627	ENSG00000141448	Luciferase reporter assay
mirtarbase	MIMAT0000257	hsa-miR-181b-5p	GATA6	2627	ENSG00000141448	Western blot
mirtarbase	MIMAT0000257	hsa-miR-181b-5p	NLK	51701	ENSG00000087095	Luciferase reporter assay//Other
mirtarbase	MIMAT0000257	hsa-miR-181b-5p	NLK	51701	ENSG00000087095	Luciferase reporter assay
mirtarbase	MIMAT0000257	hsa-miR-181b-5p	TNPO1	3842	ENSG00000083312	PAR-CLIP
mirtarbase	MIMAT0000257	hsa-miR-181b-5p	TNPO1	3842	ENSG00000083312	PAR-CLIP
mirtarbase	MIMAT0000257	hsa-miR-181b-5p	ADAM17	6868	ENSG00000151694	HITS-CLIP
mirtarbase	MIMAT0000257	hsa-miR-181b-5p	ADAM17	6868	ENSG00000151694	HITS-CLIP
mirtarbase	MIMAT0000257	hsa-miR-181b-5p	XPO6	23214	ENSG00000169180	CLASH
mirtarbase	MIMAT0000257	hsa-miR-181b-5p	XPO6	23214	ENSG00000169180	CLASH
mirtarbase	MIMAT0000257	hsa-miR-181b-5p	AP3M2	10947	ENSG00000070718	HITS-CLIP
mirtarbase	MIMAT0000257	hsa-miR-181b-5p	AP3M2	10947	ENSG00000070718	HITS-CLIP
mirtarbase	MIMAT0000257	hsa-miR-181b-5p	ATM	472	ENSG00000149311	Luciferase reporter assay//Western blot//HITS-CLIP//PAR-CLIP
mirtarbase	MIMAT0000257	hsa-miR-181b-5p	ATM	472	ENSG00000149311	Luciferase reporter assay//Western blot//HITS-CLIP//PAR-CLIP
mirtarbase	MIMAT0000257	hsa-miR-181b-5p	ATM	472	ENSG00000149311	Luciferase reporter assay//Western blot//HITS-CLIP//PAR-CLIP
mirtarbase	MIMAT0000257	hsa-miR-181b-5p	ATM	472	ENSG00000149311	Luciferase reporter assay//Western blot
mirtarbase	MIMAT0000257	hsa-miR-181b-5p	ATM	472	ENSG00000149311	HITS-CLIP
mirtarbase	MIMAT0000257	hsa-miR-181b-5p	ATM	472	ENSG00000149311	PAR-CLIP
mirtarbase	MIMAT0000257	hsa-miR-181b-5p	MAP3K3	4215	ENSG00000198909	HITS-CLIP
mirtarbase	MIMAT0000257	hsa-miR-181b-5p	MAP3K3	4215	ENSG00000198909	HITS-CLIP
mirtarbase	MIMAT0000257	hsa-miR-181b-5p	ZBTB20	26137	ENSG00000181722	CLASH
mirtarbase	MIMAT0000257	hsa-miR-181b-5p	ZBTB20	26137	ENSG00000181722	CLASH
mirtarbase	MIMAT0000257	hsa-miR-181b-5p	ADCY9	115	ENSG00000162104	Flow//Luciferase reporter assay//qRT-PCR//Western blot
mirtarbase	MIMAT0000257	hsa-miR-181b-5p	ADCY9	115	ENSG00000162104	Flow//Luciferase reporter assay//qRT-PCR//Western blot
mirtarbase	MIMAT0000257	hsa-miR-181b-5p	ADCY9	115	ENSG00000162104	PAR-CLIP
mirtarbase	MIMAT0000257	hsa-miR-181b-5p	XIAP	331	ENSG00000101966	Luciferase reporter assay
mirtarbase	MIMAT0000257	hsa-miR-181b-5p	XIAP	331	ENSG00000101966	Luciferase reporter assay
mirtarbase	MIMAT0000257	hsa-miR-181b-5p	ARF6	382	ENSG00000165527	PAR-CLIP
mirtarbase	MIMAT0000257	hsa-miR-181b-5p	ARF6	382	ENSG00000165527	PAR-CLIP
mirtarbase	MIMAT0000257	hsa-miR-181b-5p	ZFHX3	463	ENSG00000140836	CLASH
mirtarbase	MIMAT0000257	hsa-miR-181b-5p	ZFHX3	463	ENSG00000140836	CLASH
mirtarbase	MIMAT0000257	hsa-miR-181b-5p	ZFP36L1	677	ENSG00000185650	HITS-CLIP
mirtarbase	MIMAT0000257	hsa-miR-181b-5p	ZFP36L1	677	ENSG00000185650	HITS-CLIP
mirtarbase	MIMAT0000257	hsa-miR-181b-5p	CAT	847	ENSG00000121691	CLASH
mirtarbase	MIMAT0000257	hsa-miR-181b-5p	CAT	847	ENSG00000121691	CLASH
mirtarbase	MIMAT0000257	hsa-miR-181b-5p	CPOX	1371	ENSG00000080819	HITS-CLIP
mirtarbase	MIMAT0000257	hsa-miR-181b-5p	CPOX	1371	ENSG00000080819	HITS-CLIP
mirtarbase	MIMAT0000257	hsa-miR-181b-5p	CSNK1A1	1452	ENSG00000113712	PAR-CLIP
mirtarbase	MIMAT0000257	hsa-miR-181b-5p	CSNK1A1	1452	ENSG00000113712	PAR-CLIP
mirtarbase	MIMAT0000257	hsa-miR-181b-5p	CYLD	1540	ENSG00000083799	Luciferase reporter assay//qRT-PCR//Other//Western blot
mirtarbase	MIMAT0000257	hsa-miR-181b-5p	CYLD	1540	ENSG00000083799	Luciferase reporter assay//qRT-PCR//Other//Western blot
mirtarbase	MIMAT0000257	hsa-miR-181b-5p	CYLD	1540	ENSG00000083799	Luciferase reporter assay//qRT-PCR
mirtarbase	MIMAT0000257	hsa-miR-181b-5p	CYLD	1540	ENSG00000083799	Luciferase reporter assay//qRT-PCR//Western blot
mirtarbase	MIMAT0000257	hsa-miR-181b-5p	DDX3X	1654	ENSG00000215301	PAR-CLIP
mirtarbase	MIMAT0000257	hsa-miR-181b-5p	DDX3X	1654	ENSG00000215301	PAR-CLIP
mirtarbase	MIMAT0000257	hsa-miR-181b-5p	DDX3X	1654	ENSG00000215301	PAR-CLIP
mirtarbase	MIMAT0000257	hsa-miR-181b-5p	DDX3X	1654	ENSG00000215301	PAR-CLIP
mirtarbase	MIMAT0000257	hsa-miR-181b-5p	DYNC1LI2	1783	ENSG00000135720	HITS-CLIP
mirtarbase	MIMAT0000257	hsa-miR-181b-5p	DYNC1LI2	1783	ENSG00000135720	HITS-CLIP
mirtarbase	MIMAT0000257	hsa-miR-181b-5p	DUSP5	1847	ENSG00000138166	HITS-CLIP
mirtarbase	MIMAT0000257	hsa-miR-181b-5p	DUSP5	1847	ENSG00000138166	HITS-CLIP
mirtarbase	MIMAT0000257	hsa-miR-181b-5p	EN2	2020	ENSG00000164778	HITS-CLIP
mirtarbase	MIMAT0000257	hsa-miR-181b-5p	EN2	2020	ENSG00000164778	HITS-CLIP
mirtarbase	MIMAT0000257	hsa-miR-181b-5p	EP300	2033	ENSG00000100393	CLASH
mirtarbase	MIMAT0000257	hsa-miR-181b-5p	EP300	2033	ENSG00000100393	CLASH
mirtarbase	MIMAT0000257	hsa-miR-181b-5p	EPS8	2059	ENSG00000151491	PAR-CLIP
mirtarbase	MIMAT0000257	hsa-miR-181b-5p	EPS8	2059	ENSG00000151491	PAR-CLIP
mirtarbase	MIMAT0000257	hsa-miR-181b-5p	EPS8	2059	ENSG00000151491	PAR-CLIP
mirtarbase	MIMAT0000257	hsa-miR-181b-5p	EPS8	2059	ENSG00000151491	PAR-CLIP
mirtarbase	MIMAT0000257	hsa-miR-181b-5p	BPTF	2186	ENSG00000171634	CLASH
mirtarbase	MIMAT0000257	hsa-miR-181b-5p	BPTF	2186	ENSG00000171634	CLASH
mirtarbase	MIMAT0000257	hsa-miR-181b-5p	FKBP1A	2280	ENSG00000088832	PAR-CLIP
mirtarbase	MIMAT0000257	hsa-miR-181b-5p	FKBP1A	2280	ENSG00000088832	PAR-CLIP
mirtarbase	MIMAT0000257	hsa-miR-181b-5p	MTOR	2475	ENSG00000198793	CLASH
mirtarbase	MIMAT0000257	hsa-miR-181b-5p	MTOR	2475	ENSG00000198793	CLASH
mirtarbase	MIMAT0000257	hsa-miR-181b-5p	FUS	2521	ENSG00000089280	CLASH
mirtarbase	MIMAT0000257	hsa-miR-181b-5p	FUS	2521	ENSG00000089280	CLASH
mirtarbase	MIMAT0000257	hsa-miR-181b-5p	NR6A1	2649	ENSG00000148200	HITS-CLIP//PAR-CLIP
mirtarbase	MIMAT0000257	hsa-miR-181b-5p	NR6A1	2649	ENSG00000148200	HITS-CLIP//PAR-CLIP
mirtarbase	MIMAT0000257	hsa-miR-181b-5p	NR6A1	2649	ENSG00000148200	HITS-CLIP
mirtarbase	MIMAT0000257	hsa-miR-181b-5p	NR6A1	2649	ENSG00000148200	PAR-CLIP
mirtarbase	MIMAT0000257	hsa-miR-181b-5p	GNS	2799	ENSG00000135677	HITS-CLIP
mirtarbase	MIMAT0000257	hsa-miR-181b-5p	GNS	2799	ENSG00000135677	HITS-CLIP
mirtarbase	MIMAT0000257	hsa-miR-181b-5p	HK2	3099	ENSG00000159399	Immunohistochemistry//In situ hybridization//Luciferase reporter assay//qRT-PCR//Western blot
mirtarbase	MIMAT0000257	hsa-miR-181b-5p	HK2	3099	ENSG00000159399	Immunohistochemistry//In situ hybridization//Luciferase reporter assay//qRT-PCR//Western blot
mirtarbase	MIMAT0000257	hsa-miR-181b-5p	HK2	3099	ENSG00000159399	Immunohistochemistry//In situ hybridization//Luciferase reporter assay//qRT-PCR//Western blot
mirtarbase	MIMAT0000257	hsa-miR-181b-5p	HK2	3099	ENSG00000159399	Luciferase reporter assay//qRT-PCR//Western blot
mirtarbase	MIMAT0000257	hsa-miR-181b-5p	HSPA1B	3304	ENSG00000204388	PAR-CLIP
mirtarbase	MIMAT0000257	hsa-miR-181b-5p	HSPA1B	3304	ENSG00000204388	PAR-CLIP
mirtarbase	MIMAT0000257	hsa-miR-181b-5p	HSPA1B	3304	ENSG00000204388	PAR-CLIP
mirtarbase	MIMAT0000257	hsa-miR-181b-5p	HSPA1B	3304	ENSG00000204388	PAR-CLIP
mirtarbase	MIMAT0000257	hsa-miR-181b-5p	HSPA1B	3304	ENSG00000204388	PAR-CLIP
mirtarbase	MIMAT0000257	hsa-miR-181b-5p	HSPA1B	3304	ENSG00000204388	PAR-CLIP
mirtarbase	MIMAT0000257	hsa-miR-181b-5p	HSPA1B	3304	ENSG00000204388	PAR-CLIP
mirtarbase	MIMAT0000257	hsa-miR-181b-5p	HSPA1B	3304	ENSG00000204388	PAR-CLIP
mirtarbase	MIMAT0000257	hsa-miR-181b-5p	ID4	3400	ENSG00000172201	PAR-CLIP
mirtarbase	MIMAT0000257	hsa-miR-181b-5p	ID4	3400	ENSG00000172201	PAR-CLIP
mirtarbase	MIMAT0000257	hsa-miR-181b-5p	IFNGR1	3459	ENSG00000027697	CLASH
mirtarbase	MIMAT0000257	hsa-miR-181b-5p	IFNGR1	3459	ENSG00000027697	CLASH
mirtarbase	MIMAT0000257	hsa-miR-181b-5p	IGF1R	3480	ENSG00000140443	Luciferase reporter assay
mirtarbase	MIMAT0000257	hsa-miR-181b-5p	IGF1R	3480	ENSG00000140443	Luciferase reporter assay
mirtarbase	MIMAT0000257	hsa-miR-181b-5p	IL1A	3552	ENSG00000115008	HITS-CLIP
mirtarbase	MIMAT0000257	hsa-miR-181b-5p	IL1A	3552	ENSG00000115008	HITS-CLIP
mirtarbase	MIMAT0000257	hsa-miR-181b-5p	ILF2	3608	ENSG00000143621	CLASH
mirtarbase	MIMAT0000257	hsa-miR-181b-5p	ILF2	3608	ENSG00000143621	CLASH
mirtarbase	MIMAT0000257	hsa-miR-181b-5p	INCENP	3619	ENSG00000149503	HITS-CLIP
mirtarbase	MIMAT0000257	hsa-miR-181b-5p	INCENP	3619	ENSG00000149503	HITS-CLIP
mirtarbase	MIMAT0000257	hsa-miR-181b-5p	KPNA1	3836	ENSG00000114030	HITS-CLIP
mirtarbase	MIMAT0000257	hsa-miR-181b-5p	KPNA1	3836	ENSG00000114030	HITS-CLIP
mirtarbase	MIMAT0000257	hsa-miR-181b-5p	KPNA2	3838	ENSG00000182481	CLASH
mirtarbase	MIMAT0000257	hsa-miR-181b-5p	KPNA2	3838	ENSG00000182481	CLASH
mirtarbase	MIMAT0000257	hsa-miR-181b-5p	KPNA4	3840	ENSG00000186432	Luciferase reporter assay//Microarray//qRT-PCR//Western blot
mirtarbase	MIMAT0000257	hsa-miR-181b-5p	LBR	3930	ENSG00000143815	HITS-CLIP//PAR-CLIP
mirtarbase	MIMAT0000257	hsa-miR-181b-5p	LBR	3930	ENSG00000143815	HITS-CLIP//PAR-CLIP
mirtarbase	MIMAT0000257	hsa-miR-181b-5p	LBR	3930	ENSG00000143815	HITS-CLIP
mirtarbase	MIMAT0000257	hsa-miR-181b-5p	LBR	3930	ENSG00000143815	PAR-CLIP
mirtarbase	MIMAT0000257	hsa-miR-181b-5p	LMAN1	3998	ENSG00000074695	HITS-CLIP
mirtarbase	MIMAT0000257	hsa-miR-181b-5p	LMAN1	3998	ENSG00000074695	HITS-CLIP
mirtarbase	MIMAT0000257	hsa-miR-181b-5p	MAP3K10	4294	ENSG00000130758	qRT-PCR//Western blot//Other
mirtarbase	MIMAT0000257	hsa-miR-181b-5p	MAP3K10	4294	ENSG00000130758	qRT-PCR//Western blot
mirtarbase	MIMAT0000257	hsa-miR-181b-5p	MYO1C	4641	ENSG00000197879	CLASH
mirtarbase	MIMAT0000257	hsa-miR-181b-5p	MYO1C	4641	ENSG00000197879	CLASH
mirtarbase	MIMAT0000257	hsa-miR-181b-5p	NEK3	4752	ENSG00000136098	CLASH
mirtarbase	MIMAT0000257	hsa-miR-181b-5p	NEK3	4752	ENSG00000136098	CLASH
mirtarbase	MIMAT0000257	hsa-miR-181b-5p	TNFRSF11B	4982	ENSG00000164761	qRT-PCR
mirtarbase	MIMAT0000257	hsa-miR-181b-5p	PEBP1	5037	ENSG00000089220	HITS-CLIP
mirtarbase	MIMAT0000257	hsa-miR-181b-5p	PEBP1	5037	ENSG00000089220	HITS-CLIP
mirtarbase	MIMAT0000257	hsa-miR-181b-5p	PBX3	5090	ENSG00000167081	Luciferase reporter assay//qRT-PCR//Western blot
mirtarbase	MIMAT0000257	hsa-miR-181b-5p	PBX3	5090	ENSG00000167081	Luciferase reporter assay//qRT-PCR//Western blot
mirtarbase	MIMAT0000257	hsa-miR-181b-5p	PMAIP1	5366	ENSG00000141682	HITS-CLIP
mirtarbase	MIMAT0000257	hsa-miR-181b-5p	PMAIP1	5366	ENSG00000141682	HITS-CLIP
mirtarbase	MIMAT0000257	hsa-miR-181b-5p	SRGN	5552	ENSG00000122862	HITS-CLIP
mirtarbase	MIMAT0000257	hsa-miR-181b-5p	SRGN	5552	ENSG00000122862	HITS-CLIP
mirtarbase	MIMAT0000257	hsa-miR-181b-5p	PURB	5814	ENSG00000146676	HITS-CLIP
mirtarbase	MIMAT0000257	hsa-miR-181b-5p	PURB	5814	ENSG00000146676	HITS-CLIP
mirtarbase	MIMAT0000257	hsa-miR-181b-5p	PWP2	5822	ENSG00000241945	CLASH
mirtarbase	MIMAT0000257	hsa-miR-181b-5p	PWP2	5822	ENSG00000241945	CLASH
mirtarbase	MIMAT0000257	hsa-miR-181b-5p	RAN	5901	ENSG00000132341	HITS-CLIP
mirtarbase	MIMAT0000257	hsa-miR-181b-5p	RAN	5901	ENSG00000132341	HITS-CLIP
mirtarbase	MIMAT0000257	hsa-miR-181b-5p	RAP1B	5908	ENSG00000127314	Immunofluorescence//Luciferase reporter assay//qRT-PCR//Western blot
mirtarbase	MIMAT0000257	hsa-miR-181b-5p	RAP1B	5908	ENSG00000127314	Immunofluorescence//Luciferase reporter assay//qRT-PCR//Western blot
mirtarbase	MIMAT0000257	hsa-miR-181b-5p	KDM5A	5927	ENSG00000073614	HITS-CLIP
mirtarbase	MIMAT0000257	hsa-miR-181b-5p	KDM5A	5927	ENSG00000073614	HITS-CLIP
mirtarbase	MIMAT0000257	hsa-miR-181b-5p	RGS16	6004	ENSG00000143333	HITS-CLIP
mirtarbase	MIMAT0000257	hsa-miR-181b-5p	RGS16	6004	ENSG00000143333	HITS-CLIP
mirtarbase	MIMAT0000257	hsa-miR-181b-5p	RLF	6018	ENSG00000117000	HITS-CLIP
mirtarbase	MIMAT0000257	hsa-miR-181b-5p	RLF	6018	ENSG00000117000	HITS-CLIP
mirtarbase	MIMAT0000257	hsa-miR-181b-5p	RNF2	6045	ENSG00000121481	Luciferase reporter assay//Microarray//qRT-PCR//Western blot
mirtarbase	MIMAT0000257	hsa-miR-181b-5p	RNF2	6045	ENSG00000121481	Luciferase reporter assay//Microarray//qRT-PCR//Western blot
mirtarbase	MIMAT0000257	hsa-miR-181b-5p	RNF6	6049	ENSG00000127870	PAR-CLIP
mirtarbase	MIMAT0000257	hsa-miR-181b-5p	RNF6	6049	ENSG00000127870	PAR-CLIP
mirtarbase	MIMAT0000257	hsa-miR-181b-5p	RNF6	6049	ENSG00000127870	PAR-CLIP
mirtarbase	MIMAT0000257	hsa-miR-181b-5p	RNF6	6049	ENSG00000127870	PAR-CLIP
mirtarbase	MIMAT0000257	hsa-miR-181b-5p	RPS6KA3	6197	ENSG00000177189	HITS-CLIP
mirtarbase	MIMAT0000257	hsa-miR-181b-5p	RPS6KA3	6197	ENSG00000177189	HITS-CLIP
mirtarbase	MIMAT0000257	hsa-miR-181b-5p	RPS7	6201	ENSG00000171863	CLASH
mirtarbase	MIMAT0000257	hsa-miR-181b-5p	RPS7	6201	ENSG00000171863	CLASH
mirtarbase	MIMAT0000257	hsa-miR-181b-5p	RPS12	6206	ENSG00000112306	CLASH
mirtarbase	MIMAT0000257	hsa-miR-181b-5p	RPS12	6206	ENSG00000112306	CLASH
mirtarbase	MIMAT0000257	hsa-miR-181b-5p	SORT1	6272	ENSG00000134243	HITS-CLIP
mirtarbase	MIMAT0000257	hsa-miR-181b-5p	SORT1	6272	ENSG00000134243	HITS-CLIP
mirtarbase	MIMAT0000257	hsa-miR-181b-5p	ATXN7	6314	ENSG00000163635	HITS-CLIP
mirtarbase	MIMAT0000257	hsa-miR-181b-5p	ATXN7	6314	ENSG00000163635	HITS-CLIP
mirtarbase	MIMAT0000257	hsa-miR-181b-5p	SCD	6319	ENSG00000099194	PAR-CLIP
mirtarbase	MIMAT0000257	hsa-miR-181b-5p	SCD	6319	ENSG00000099194	PAR-CLIP
mirtarbase	MIMAT0000257	hsa-miR-181b-5p	SCD	6319	ENSG00000099194	PAR-CLIP
mirtarbase	MIMAT0000257	hsa-miR-181b-5p	SCD	6319	ENSG00000099194	PAR-CLIP
mirtarbase	MIMAT0000257	hsa-miR-181b-5p	CCL22	6367	ENSG00000102962	HITS-CLIP
mirtarbase	MIMAT0000257	hsa-miR-181b-5p	CCL22	6367	ENSG00000102962	HITS-CLIP
mirtarbase	MIMAT0000257	hsa-miR-181b-5p	SPP1	6696	ENSG00000118785	Luciferase reporter assay//qRT-PCR//Western blot
mirtarbase	MIMAT0000257	hsa-miR-181b-5p	SPP1	6696	ENSG00000118785	Luciferase reporter assay//qRT-PCR//Western blot
mirtarbase	MIMAT0000257	hsa-miR-181b-5p	TEF	7008	ENSG00000167074	HITS-CLIP
mirtarbase	MIMAT0000257	hsa-miR-181b-5p	TEF	7008	ENSG00000167074	HITS-CLIP
mirtarbase	MIMAT0000257	hsa-miR-181b-5p	TFRC	7037	ENSG00000072274	HITS-CLIP
mirtarbase	MIMAT0000257	hsa-miR-181b-5p	TFRC	7037	ENSG00000072274	HITS-CLIP
mirtarbase	MIMAT0000257	hsa-miR-181b-5p	TMF1	7110	ENSG00000144747	HITS-CLIP
mirtarbase	MIMAT0000257	hsa-miR-181b-5p	TMF1	7110	ENSG00000144747	HITS-CLIP
mirtarbase	MIMAT0000257	hsa-miR-181b-5p	UBB	7314	ENSG00000170315	CLASH
mirtarbase	MIMAT0000257	hsa-miR-181b-5p	UBB	7314	ENSG00000170315	CLASH
mirtarbase	MIMAT0000257	hsa-miR-181b-5p	ZNF23	7571	ENSG00000167377	PAR-CLIP
mirtarbase	MIMAT0000257	hsa-miR-181b-5p	ZNF23	7571	ENSG00000167377	PAR-CLIP
mirtarbase	MIMAT0000257	hsa-miR-181b-5p	ZNF136	7695	ENSG00000196646	HITS-CLIP
mirtarbase	MIMAT0000257	hsa-miR-181b-5p	ZNF136	7695	ENSG00000196646	HITS-CLIP
mirtarbase	MIMAT0000257	hsa-miR-181b-5p	SHOC2	8036	ENSG00000108061	HITS-CLIP
mirtarbase	MIMAT0000257	hsa-miR-181b-5p	SHOC2	8036	ENSG00000108061	HITS-CLIP
mirtarbase	MIMAT0000257	hsa-miR-181b-5p	PDHX	8050	ENSG00000110435	CLASH
mirtarbase	MIMAT0000257	hsa-miR-181b-5p	PDHX	8050	ENSG00000110435	CLASH
mirtarbase	MIMAT0000257	hsa-miR-181b-5p	CUL5	8065	ENSG00000166266	HITS-CLIP
mirtarbase	MIMAT0000257	hsa-miR-181b-5p	CUL5	8065	ENSG00000166266	HITS-CLIP
mirtarbase	MIMAT0000257	hsa-miR-181b-5p	TRRAP	8295	ENSG00000196367	CLASH
mirtarbase	MIMAT0000257	hsa-miR-181b-5p	TRRAP	8295	ENSG00000196367	CLASH
mirtarbase	MIMAT0000257	hsa-miR-181b-5p	ULK1	8408	ENSG00000177169	HITS-CLIP
mirtarbase	MIMAT0000257	hsa-miR-181b-5p	ULK1	8408	ENSG00000177169	HITS-CLIP
mirtarbase	MIMAT0000257	hsa-miR-181b-5p	CBX4	8535	ENSG00000141582	PAR-CLIP
mirtarbase	MIMAT0000257	hsa-miR-181b-5p	CBX4	8535	ENSG00000141582	PAR-CLIP
mirtarbase	MIMAT0000257	hsa-miR-181b-5p	CBX4	8535	ENSG00000141582	PAR-CLIP
mirtarbase	MIMAT0000257	hsa-miR-181b-5p	CBX4	8535	ENSG00000141582	PAR-CLIP
mirtarbase	MIMAT0000257	hsa-miR-181b-5p	CBX4	8535	ENSG00000141582	PAR-CLIP
mirtarbase	MIMAT0000257	hsa-miR-181b-5p	CBX4	8535	ENSG00000141582	PAR-CLIP
mirtarbase	MIMAT0000257	hsa-miR-181b-5p	CBX4	8535	ENSG00000141582	PAR-CLIP
mirtarbase	MIMAT0000257	hsa-miR-181b-5p	CBX4	8535	ENSG00000141582	PAR-CLIP
mirtarbase	MIMAT0000257	hsa-miR-181b-5p	CBX4	8535	ENSG00000141582	PAR-CLIP
mirtarbase	MIMAT0000257	hsa-miR-181b-5p	CBX4	8535	ENSG00000141582	PAR-CLIP
mirtarbase	MIMAT0000257	hsa-miR-181b-5p	TNFSF11	8600	ENSG00000120659	qRT-PCR
mirtarbase	MIMAT0000257	hsa-miR-181b-5p	EIF3C	8663	ENSG00000184110	CLASH
mirtarbase	MIMAT0000257	hsa-miR-181b-5p	EIF3C	8663	ENSG00000184110	CLASH
mirtarbase	MIMAT0000257	hsa-miR-181b-5p	EED	8726	ENSG00000074266	HITS-CLIP
mirtarbase	MIMAT0000257	hsa-miR-181b-5p	EED	8726	ENSG00000074266	HITS-CLIP
mirtarbase	MIMAT0000257	hsa-miR-181b-5p	RNMT	8731	ENSG00000101654	HITS-CLIP
mirtarbase	MIMAT0000257	hsa-miR-181b-5p	RNMT	8731	ENSG00000101654	HITS-CLIP
mirtarbase	MIMAT0000257	hsa-miR-181b-5p	CCNK	8812	ENSG00000090061	HITS-CLIP//PAR-CLIP
mirtarbase	MIMAT0000257	hsa-miR-181b-5p	CCNK	8812	ENSG00000090061	HITS-CLIP//PAR-CLIP
mirtarbase	MIMAT0000257	hsa-miR-181b-5p	CCNK	8812	ENSG00000090061	HITS-CLIP
mirtarbase	MIMAT0000257	hsa-miR-181b-5p	CCNK	8812	ENSG00000090061	PAR-CLIP
mirtarbase	MIMAT0000257	hsa-miR-181b-5p	KAT2B	8850	ENSG00000114166	Western blot//Luciferase reporter assay//Other
mirtarbase	MIMAT0000257	hsa-miR-181b-5p	KAT2B	8850	ENSG00000114166	Western blot//Luciferase reporter assay
mirtarbase	MIMAT0000257	hsa-miR-181b-5p	PER2	8864	ENSG00000132326	HITS-CLIP
mirtarbase	MIMAT0000257	hsa-miR-181b-5p	PER2	8864	ENSG00000132326	HITS-CLIP
mirtarbase	MIMAT0000257	hsa-miR-181b-5p	USP10	9100	ENSG00000103194	CLASH
mirtarbase	MIMAT0000257	hsa-miR-181b-5p	USP10	9100	ENSG00000103194	CLASH
mirtarbase	MIMAT0000257	hsa-miR-181b-5p	EIF4E2	9470	ENSG00000135930	CLASH
[truncated: 2,216 more rows]

## Sheet: Table S6
Table S6.Leave-One-Out sensitivity analysis summary for replicated miRNAs
miRNA	Stage	Dataset	Main MR method	n SNPs	LOO performed	Direction consistent	Material change by any single SNP	Interpretation
let-7e-5p	Discovery	Nikpay Cis	Wald ratio	1	No	NA	NA	Not applicable because only one SNP was available
miR-125a-5p	Discovery	Nikpay Cis	Wald ratio	1	No	NA	NA	Not applicable because only one SNP was available
miR-133a-3p	Discovery	Nikpay Cis	IVW	2	Yes	Yes	No	Stable across leave-one-out iterations
miR-148a-3p	Discovery	Nikpay Cis	Wald ratio	1	No	NA	NA	Not applicable because only one SNP was available
miR-181b-5p	Discovery	Nikpay Cis	IVW	3	Yes	Yes	Yes	Effect direction remained consistent, but modest attenuation was observed after excluding individual SNPs
miR-1908-5p	Discovery	Nikpay Cis	Wald ratio	1	No	NA	NA	Not applicable because only one SNP was available
miR-125a-5p	Validation	FHS Cis	IVW	3	Yes	Yes	Yes	Effect direction remained consistent, but modest attenuation was observed after excluding individual SNPs
miR-148a-3p	Validation	FHS Cis	Wald ratio	1	No	NA	NA	Not applicable because only one SNP was available
let-7e-5p	Validation	Nikpay Trans	IVW	5	Yes	Yes	Yes	Effect direction remained consistent, but modest attenuation was observed after excluding individual SNPs
miR-125a-5p	Validation	Nikpay Trans	IVW	7	Yes	Yes	Yes	Effect direction remained consistent, but modest attenuation was observed after excluding individual SNPs
miR-133a-3p	Validation	Nikpay Trans	IVW	2	Yes	Yes	No	Stable across leave-one-out iterations
miR-148a-3p	Validation	Nikpay Trans	IVW	7	Yes	No	Yes	Potential sensitivity to individual SNP exclusion; interpretation should be cautious
miR-181b-5p	Validation	Nikpay Trans	IVW	8	Yes	Yes	Yes	Effect direction remained consistent, but modest attenuation was observed after excluding individual SNPs
miR-1908-5p	Validation	Nikpay Trans	IVW	2	Yes	Yes	No	Stable across leave-one-out iterations
Note: NA, Not avaliable

## Sheet: Table S7
Table S7. Radial MR sensitivity analysis summary for replicated miRNAs
miRNA	Stage	Dataset	n SNPs	Radial performed	IVW radial fitted	Egger radial fitted	Potential outlier signal	Plot rendering stable	Interpretation
let-7e-5p	Discovery	Nikpay Cis	1	No	NA	NA	NA	NA	Not applicable because fewer than three SNPs were available
miR-125a-5p	Discovery	Nikpay Cis	1	No	NA	NA	NA	NA	Not applicable because fewer than three SNPs were available
miR-133a-3p	Discovery	Nikpay Cis	2	No	NA	NA	NA	NA	Not applicable because fewer than three SNPs were available
miR-148a-3p	Discovery	Nikpay Cis	1	No	NA	NA	NA	NA	Not applicable because fewer than three SNPs were available
miR-181b-5p	Discovery	Nikpay Cis	3	Yes	Partial	Yes	Suggestive	Yes	Radial MR was attempted, but IVW radial fitting showed instability; results should be interpreted cautiously
miR-1908-5p	Discovery	Nikpay Cis	1	No	NA	NA	NA	NA	Not applicable because fewer than three SNPs were available
miR-125a-5p	Validation	FHS Cis	3	Yes	Partial	Yes	Suggestive	Yes	Radial MR suggested possible outlier signals, but model instability warrants cautious interpretation
miR-148a-3p	Validation	FHS Cis	1	No	NA	NA	NA	NA	Not applicable because fewer than three SNPs were available
let-7e-5p	Validation	Nikpay Trans	5	Yes	Partial	Yes	Suggestive	Yes	Radial MR suggested possible outlier signals, but IVW fitting was unstable
miR-125a-5p	Validation	Nikpay Trans	7	Yes	Yes	Yes	Yes	Yes	Potential outlier signal detected by radial MR
miR-133a-3p	Validation	Nikpay Trans	2	No	NA	NA	NA	NA	Not applicable because fewer than three SNPs were available
miR-148a-3p	Validation	Nikpay Trans	7	Yes	Yes	Yes	Yes	Yes	Potential outlier signal detected by radial MR
miR-181b-5p	Validation	Nikpay Trans	8	Yes	Yes	Yes	Yes	Yes	Potential outlier signal detected by radial MR
miR-1908-5p	Validation	Nikpay Trans	2	No	NA	NA	NA	NA	Not applicable because fewer than three SNPs were available
Note: NA, Not avaliable

## Sheet: Table S8
Table S8. Phenome-wide screening results of instrumental SNPs against predefined atopic dermatitis-related confounding domains
Query	GWAS_Trait	PMID	RS_Number	Position_GRCh37	Alleles	R2	D'	Risk_Allele	Effect_Size_95_CI	Beta_or_OR	P_value	Query_SNP	Related_miRNA
rs10512230	Birth weight	31043758	rs7854962	chr9:96900505	C=0.794, G=0.206	0.500139737653968	0.964212788058597	0.784881	0.021679	0.015-0.028	1e-11	rs10512230	let-7a-5p
rs10512230	Birth weight (MTAG)	31681408	rs9409710	chr9:97009024	A=0.69, G=0.31	0.838528755711436	0.947764434877837	0.7	0.0235584	0.016-0.032	7e-09	rs10512230	let-7a-5p
rs7251234	Eosinophil count	32888493	rs12984737	chr19:52118441	A=0.272, G=0.728	0.241988856394158	1	0.286585	NA	NA	3e-17	rs7251234	miR-99b-5p
rs7251234	eosinophil (absolute count, maximum, inv-norm transformed)	39024449	rs12984737	chr19:52118441	A=0.272, G=0.728	0.241988856394158	1	0.7613	0.02936	0.022-0.037	1e-14	rs7251234	miR-99b-5p
rs7251234	eosinophil (absolute count, mean, inv-norm transformed)	39024449	rs12984737	chr19:52118441	A=0.272, G=0.728	0.241988856394158	1	0.7114	0.03131	0.025-0.038	6e-20	rs7251234	miR-99b-5p
rs7251234	eosinophil (absolute count, maximum, inv-norm transformed)	39024449	rs12984737	chr19:52118441	A=0.272, G=0.728	0.241988856394158	1	0.7114	0.03314	0.027-0.04	5e-23	rs7251234	miR-99b-5p
rs7251234	eosinophil (absolute count, mean, inv-norm transformed)	39024449	rs6509558	chr19:52127949	C=0.726, T=0.274	0.244423020873035	1	0.7597	0.02788	0.02-0.035	3e-13	rs7251234	miR-99b-5p
rs7251234	Eosinophil count	30595370	rs11084096	chr19:52128795	A=0.274, G=0.726	0.239932926105053	0.990772335351312	NR	NA	NA	5e-16	rs7251234	miR-99b-5p
rs12125200	Eosinophil count	35935937	rs1124025	chr1:198979818	C=0.245, G=0.755	0.875372230468482	0.983443599618182	0.239	0.026	0.018-0.034	2e-09	rs12125200	miR-181b-5p
rs12125200	Eosinophil percentage of white cells	32888494	rs6427756	chr1:199000727	A=0.264, G=0.736	0.994896147250718	1	0.733811	0.0330584	0.028-0.038	1e-39	rs12125200	miR-181b-5p
rs12125200	eosinophil (fraction, minimum, inv-norm transformed)	39024449	rs6427756	chr1:199000727	A=0.264, G=0.736	0.994896147250718	1	0.3054	0.02071	0.015-0.027	7e-12	rs12125200	miR-181b-5p
rs12125200	eosinophil (absolute count, minimum, inv-norm transformed)	39024449	rs6427756	chr1:199000727	A=0.264, G=0.736	0.994896147250718	1	0.2905	0.02591	0.019-0.032	3e-15	rs12125200	miR-181b-5p
rs12125200	Eosinophil percentage of granulocytes	27863252	rs1036332	chr1:199012478	A=0.264, C=0.736	0.94451219342768	0.974349821519633	0.738	0.0348224	0.027-0.043	2e-17	rs12125200	miR-181b-5p
rs12125200	Sum eosinophil basophil counts	27863252	rs1036332	chr1:199012478	A=0.264, C=0.736	0.94451219342768	0.974349821519633	0.738	0.0385855	0.031-0.047	4e-21	rs12125200	miR-181b-5p
rs12125200	Eosinophil percentage of white cells	27863252	rs1036332	chr1:199012478	A=0.264, C=0.736	0.94451219342768	0.974349821519633	0.738	0.0380478	0.03-0.046	1e-20	rs12125200	miR-181b-5p
rs12125200	Eosinophil count	27863252	rs1036332	chr1:199012478	A=0.264, C=0.736	0.94451219342768	0.974349821519633	0.7379	0.0381039	0.03-0.046	1e-20	rs12125200	miR-181b-5p
rs12125200	Eosinophil count	32888494	rs1036332	chr1:199012478	A=0.264, C=0.736	0.94451219342768	0.974349821519633	0.738038	0.0335393	0.029-0.038	2e-40	rs12125200	miR-181b-5p
rs12125200	Eosinophil count	32888493	rs1036332	chr1:199012478	A=0.264, C=0.736	0.94451219342768	0.974349821519633	0.745819	NA	NA	3e-50	rs12125200	miR-181b-5p
rs12125200	Eosinophil count	32888493	rs1036332	chr1:199012478	A=0.264, C=0.736	0.94451219342768	0.974349821519633	0.737405	0.032696	0.028-0.037	2e-47	rs12125200	miR-181b-5p
rs12125200	Eosinophil count	30595370	rs1036332	chr1:199012478	A=0.264, C=0.736	0.94451219342768	0.974349821519633	NR	NA	NA	7e-39	rs12125200	miR-181b-5p
rs12125200	Eosinophil count	34594039	rs1036332	chr1:199012478	A=0.264, C=0.736	0.94451219342768	0.974349821519633	NR	0.0234	0.02-0.027	3e-35	rs12125200	miR-181b-5p
rs12125200	Eosinophill percentage (UKB data field 30210)	39789286	rs1036332	chr1:199012478	A=0.264, C=0.736	0.94451219342768	0.974349821519633	0.739535	0.0287382	0.024-0.033	2e-38	rs12125200	miR-181b-5p
rs12125200	Eosinophill count (UKB data field 30150)	39789286	rs1036332	chr1:199012478	A=0.264, C=0.736	0.94451219342768	0.974349821519633	0.739535	0.0259228	0.021-0.031	1e-30	rs12125200	miR-181b-5p
rs2360964	Eosinophil percentage of white cells	32888494	rs6427756	chr1:199000727	A=0.264, G=0.736	0.101880410252927	0.356958679118546	0.733811	0.0330584	0.028-0.038	1e-39	rs2360964	miR-181b-5p
rs2360964	eosinophil (fraction, minimum, inv-norm transformed)	39024449	rs6427756	chr1:199000727	A=0.264, G=0.736	0.101880410252927	0.356958679118546	0.3054	0.02071	0.015-0.027	7e-12	rs2360964	miR-181b-5p
rs2360964	eosinophil (absolute count, minimum, inv-norm transformed)	39024449	rs6427756	chr1:199000727	A=0.264, G=0.736	0.101880410252927	0.356958679118546	0.2905	0.02591	0.019-0.032	3e-15	rs2360964	miR-181b-5p
rs12434496	Serum 25-Hydroxyvitamin D levels (conditioned on BMI)	32242144	rs12881545	chr14:101176212	C=0.651, G=0.349	0.430325588564928	0.991958754646097	0.326561	0.011	-0.0078	3e-07	rs12434496	miR-136-5p
rs12434496	Age of smoking initiation (MTAG)	30643251	rs12881760	chr14:101176335	C=0.651, G=0.349	0.430325588564928	0.991958754646097	0.649	0.00849798	0.0055-0.0115	3e-08	rs12434496	miR-136-5p
rs174561	Sex hormone-binding globulin levels adjusted for BMI	32042192	rs174528	chr11:61543499	C=0.388, T=0.612	0.687223380518673	1	0.619906	0.00773394	0.0054-0.0101	4e-11	rs174561	miR-1908-5p
rs174561	Atopic dermatitis	38663478	rs108499	chr11:61547237	C=0.667, T=0.333	0.57631826654715	0.813207593266717	NR	0.0475	0.03-0.065	4e-08	rs174561	miR-1908-5p
rs174561	Sex hormone-binding globulin levels adjusted for BMI	32042192	rs174533	chr11:61549025	A=0.348, G=0.652	0.815488078255553	1	0.652448	0.0096524	0.0079-0.0114	1e-28	rs174561	miR-1908-5p
rs174561	eosinophil (fraction, mean, inv-norm transformed)	39024449	rs174534	chr11:61549458	A=0.653, G=0.347	0.563318588247264	0.82930858098161	0.6965	0.02375	0.017-0.031	1e-11	rs174561	miR-1908-5p
rs174561	eosinophil (fraction, maximum, inv-norm transformed)	39024449	rs174534	chr11:61549458	A=0.653, G=0.347	0.563318588247264	0.82930858098161	0.6965	0.02304	0.016-0.03	5e-12	rs174561	miR-1908-5p
rs174561	eosinophil (absolute count, maximum, inv-norm transformed)	39024449	rs174534	chr11:61549458	A=0.653, G=0.347	0.563318588247264	0.82930858098161	0.6983	0.02565	0.019-0.033	3e-13	rs174561	miR-1908-5p
rs174561	eosinophil (fraction, maximum, inv-norm transformed)	39024449	rs174534	chr11:61549458	A=0.653, G=0.347	0.563318588247264	0.82930858098161	0.6663	0.02358	0.018-0.03	6e-15	rs174561	miR-1908-5p
rs174561	eosinophil (fraction, mean, inv-norm transformed)	39024449	rs174534	chr11:61549458	A=0.653, G=0.347	0.563318588247264	0.82930858098161	0.6663	0.0241	0.018-0.03	8e-15	rs174561	miR-1908-5p
rs174561	Chronic inflammatory diseases (ankylosing spondylitis, Crohn's disease, psoriasis, primary sclerosing cholangitis, ulcerative colitis) (pleiotropy)	26974007	rs174535	chr11:61551356	C=0.355, T=0.645	0.79096688604115	1	NR	NA	NA	2e-11	rs174561	miR-1908-5p
rs174561	Eosinophil count	34469753	rs174535	chr11:61551356	C=0.355, T=0.645	0.79096688604115	1	0.649	NA	NA	2e-16	rs174561	miR-1908-5p
rs174561	Asthma (adult onset)	30929738	rs174535	chr11:61551356	C=0.355, T=0.645	0.79096688604115	1	0.648	1.05	1.04-1.06	3e-11	rs174561	miR-1908-5p
rs174561	Asthma	30929738	rs174535	chr11:61551356	C=0.355, T=0.645	0.79096688604115	1	NR	1.05	1.04-1.06	7e-12	rs174561	miR-1908-5p
rs174561	Age of onset of adult onset asthma	36778051	rs174535	chr11:61551356	C=0.355, T=0.645	0.79096688604115	1	NR	0.054429	0.042-0.067	2e-16	rs174561	miR-1908-5p
rs174561	Seborrheic dermatitis (PheCode 690.1)	39024449	rs174535	chr11:61551356	C=0.355, T=0.645	0.79096688604115	1	0.6696	0.05723	0.041-0.073	4e-11	rs174561	miR-1908-5p
rs174561	Sex hormone-binding globulin levels adjusted for BMI and heel estimated bone mineral density	37615194	rs174536	chr11:61551927	A=0.65, C=0.35	0.808382505511607	1	NR	NA	NA	3e-42	rs174561	miR-1908-5p
rs174561	Sex hormone-binding globulin levels adjusted for BMI	32042192	rs174537	chr11:61552680	G=0.651, T=0.349	0.811925169985084	1	0.654276	0.0122602	0.0097-0.0148	6e-21	rs174561	miR-1908-5p
rs174561	Fluid intelligence score (baseline)	40374629	rs61896141	chr11:61556039	A=0.848, C=0.152	0.396927887596826	0.981240617978052	0.810888	0.0199065	0.013-0.027	4e-09	rs174561	miR-1908-5p
rs174561	Eosinophil count	32888494	rs102275	chr11:61557803	C=0.363, T=0.637	0.764094346628105	1	0.351491	0.0214744	0.017-0.026	2e-20	rs174561	miR-1908-5p
rs174561	Asthma	39024449	rs174544	chr11:61567753	A=0.304, C=0.696	0.995310154494513	1	0.7066	0.05849	0.042-0.075	2e-12	rs174561	miR-1908-5p
rs174561	Sum eosinophil basophil counts	27863252	rs174548	chr11:61571348	C=0.686, G=0.314	0.950044240596616	1	0.3139	0.0253036	0.018-0.033	4e-11	rs174561	miR-1908-5p
rs174561	Eosinophil count	32888493	rs174548	chr11:61571348	C=0.686, G=0.314	0.950044240596616	1	0.313571	0.023058	0.019-0.027	4e-27	rs174561	miR-1908-5p
rs174561	Eosinophil count	30595370	rs174548	chr11:61571348	C=0.686, G=0.314	0.950044240596616	1	NR	NA	NA	5e-31	rs174561	miR-1908-5p
rs174561	Atopic dermatitis	40164604	rs174548	chr11:61571348	C=0.686, G=0.314	0.950044240596616	1	NR	0.046696	0.03-0.063	2e-08	rs174561	miR-1908-5p
rs174561	Eosinophil count	27863252	rs174549	chr11:61571382	A=0.304, G=0.696	0.995310154494513	1	0.3091	0.0270285	0.019-0.035	2e-12	rs174561	miR-1908-5p
rs174561	Fasting blood glucose (BMI interaction)	22581228	rs174550	chr11:61571478	C=0.347, T=0.653	0.81907140433846	1	0.6571	0.001	-0.00272	2e-09	rs174561	miR-1908-5p
rs174561	Asthma	32296059	rs174551	chr11:61573684	C=0.347, T=0.653	0.81907140433846	1	0.66	NA	NA	6e-18	rs174561	miR-1908-5p
rs174561	Asthma or colon polyp (MTAG)	40155373	rs174553	chr11:61575158	A=0.653, G=0.347	0.81907140433846	1	NR	0.99	0.99-0.99	6e-19	rs174561	miR-1908-5p
rs174561	Sum neutrophil eosinophil counts	27863252	rs174555	chr11:61579760	C=0.303, T=0.697	1	1	0.3085	0.028962	0.021-0.037	7e-14	rs174561	miR-1908-5p
rs174561	Fasting glucose adjusted for BMI	34951656	rs174556	chr11:61580635	C=0.697, T=0.303	1	1	0.329	0.0463	0.032-0.061	8e-10	rs174561	miR-1908-5p
rs174561	Fasting glucose adjusted for BMI	34951656	rs174556	chr11:61580635	C=0.697, T=0.303	1	1	0.2949	0.0565	0.034-0.079	6e-07	rs174561	miR-1908-5p
rs174561	Asthma	39024449	rs174557	chr11:61581368	A=0.696, G=0.304	0.995310154494513	1	0.7267	0.05631	0.04-0.073	1e-12	rs174561	miR-1908-5p
rs174561	eosinophil (absolute count, mean, inv-norm transformed)	39024449	rs174559	chr11:61581656	A=0.267, G=0.733	0.838886046666815	1	0.7551	0.02938	0.022-0.037	1e-14	rs174561	miR-1908-5p
rs174561	eosinophil (absolute count, minimum, inv-norm transformed)	39024449	rs174559	chr11:61581656	A=0.267, G=0.733	0.838886046666815	1	0.7374	0.02093	0.015-0.027	2e-11	rs174561	miR-1908-5p
rs174561	Asthma	31959851	rs174562	chr11:61585144	A=0.655, G=0.345	0.818049287885265	0.994994900370656	0.65436	1.04422	1.03-1.05	6e-11	rs174561	miR-1908-5p
rs174561	Eosinophil count	35935937	rs174564	chr11:61588305	A=0.647, G=0.353	0.797874264129714	1	0.236	0.026	0.018-0.034	2e-11	rs174561	miR-1908-5p
rs174561	Metabolite risk score for predicting weight gain	31560688	rs174565	chr11:61591636	C=0.84, G=0.16	0.166554156480748	0.616714365458396	0.701	0.267	0.18-0.35	6e-10	rs174561	miR-1908-5p
rs174561	Asthma	31619474	rs174566	chr11:61592362	A=0.644, G=0.356	0.787542138525172	1	0.648975	1.03783	1.03-1.05	5e-09	rs174561	miR-1908-5p
rs174561	HDL cholesterol levels x alcohol consumption (regular vs non-regular drinkers) interaction (2df)	30698716	rs174566	chr11:61592362	A=0.644, G=0.356	0.787542138525172	1	NR	NA	NA	2e-06	rs174561	miR-1908-5p
rs174561	HDL cholesterol levels x alcohol consumption (regular vs non-regular drinkers) interaction (2df)	30698716	rs174566	chr11:61592362	A=0.644, G=0.356	0.787542138525172	1	NR	NA	NA	7e-42	rs174561	miR-1908-5p
rs174561	Triglyceride levels x alcohol consumption (regular vs non-regular drinkers) interaction (2df)	30698716	rs174566	chr11:61592362	A=0.644, G=0.356	0.787542138525172	1	NR	NA	NA	5e-68	rs174561	miR-1908-5p
rs174561	Triglyceride levels x alcohol consumption (regular vs non-regular drinkers) interaction (2df)	30698716	rs174566	chr11:61592362	A=0.644, G=0.356	0.787542138525172	1	NR	NA	NA	5e-07	rs174561	miR-1908-5p
rs174561	Triglyceride levels x alcohol consumption (regular vs non-regular drinkers) interaction (2df)	30698716	rs174566	chr11:61592362	A=0.644, G=0.356	0.787542138525172	1	NR	NA	NA	2e-16	rs174561	miR-1908-5p
rs174561	Triglyceride levels x alcohol consumption (regular vs non-regular drinkers) interaction (2df)	30698716	rs174566	chr11:61592362	A=0.644, G=0.356	0.787542138525172	1	NR	NA	NA	6e-44	rs174561	miR-1908-5p
rs174561	Triglyceride levels x alcohol consumption (regular vs non-regular drinkers) interaction (2df)	30698716	rs174566	chr11:61592362	A=0.644, G=0.356	0.787542138525172	1	NR	NA	NA	1e-08	rs174561	miR-1908-5p
rs174561	Aspartate aminotransferase platelet ratio index in high alcohol intake	32561361	rs174566	chr11:61592362	A=0.644, G=0.356	0.787542138525172	1	0.3502	0.008096	NA	2e-08	rs174561	miR-1908-5p
rs174561	LDL cholesterol levels x alcohol consumption (regular vs non-regular drinkers) interaction (2df)	30698716	rs174566	chr11:61592362	A=0.644, G=0.356	0.787542138525172	1	NR	NA	NA	8e-49	rs174561	miR-1908-5p
rs174561	HDL cholesterol levels x alcohol consumption (regular vs non-regular drinkers) interaction (2df)	30698716	rs174566	chr11:61592362	A=0.644, G=0.356	0.787542138525172	1	NR	NA	NA	3e-40	rs174561	miR-1908-5p
rs174561	LDL cholesterol levels x alcohol consumption (drinkers vs non-drinkers) interaction (2df)	30698716	rs174566	chr11:61592362	A=0.644, G=0.356	0.787542138525172	1	NR	NA	NA	4e-51	rs174561	miR-1908-5p
rs174561	LDL cholesterol levels x alcohol consumption (drinkers vs non-drinkers) interaction (2df)	30698716	rs174566	chr11:61592362	A=0.644, G=0.356	0.787542138525172	1	NR	NA	NA	2e-48	rs174561	miR-1908-5p
rs174561	LDL cholesterol levels x alcohol consumption (drinkers vs non-drinkers) interaction (2df)	30698716	rs174566	chr11:61592362	A=0.644, G=0.356	0.787542138525172	1	NR	NA	NA	2e-08	rs174561	miR-1908-5p
rs174561	Triglyceride levels x alcohol consumption (drinkers vs non-drinkers) interaction (2df)	30698716	rs174566	chr11:61592362	A=0.644, G=0.356	0.787542138525172	1	NR	NA	NA	2e-44	rs174561	miR-1908-5p
rs174561	Triglyceride levels x alcohol consumption (drinkers vs non-drinkers) interaction (2df)	30698716	rs174566	chr11:61592362	A=0.644, G=0.356	0.787542138525172	1	NR	NA	NA	4e-16	rs174561	miR-1908-5p
rs174561	Triglyceride levels x alcohol consumption (drinkers vs non-drinkers) interaction (2df)	30698716	rs174566	chr11:61592362	A=0.644, G=0.356	0.787542138525172	1	NR	NA	NA	2e-08	rs174561	miR-1908-5p
rs174561	Triglyceride levels x alcohol consumption (drinkers vs non-drinkers) interaction (2df)	30698716	rs174566	chr11:61592362	A=0.644, G=0.356	0.787542138525172	1	NR	NA	NA	6e-68	rs174561	miR-1908-5p
rs174561	HDL cholesterol levels x alcohol consumption (drinkers vs non-drinkers) interaction (2df)	30698716	rs174566	chr11:61592362	A=0.644, G=0.356	0.787542138525172	1	NR	NA	NA	3e-06	rs174561	miR-1908-5p
rs174561	HDL cholesterol levels x alcohol consumption (drinkers vs non-drinkers) interaction (2df)	30698716	rs174566	chr11:61592362	A=0.644, G=0.356	0.787542138525172	1	NR	NA	NA	3e-50	rs174561	miR-1908-5p
rs174561	HDL cholesterol levels x alcohol consumption (drinkers vs non-drinkers) interaction (2df)	30698716	rs174566	chr11:61592362	A=0.644, G=0.356	0.787542138525172	1	NR	NA	NA	2e-48	rs174561	miR-1908-5p
rs174561	LDL cholesterol levels x alcohol consumption (regular vs non-regular drinkers) interaction (2df)	30698716	rs174566	chr11:61592362	A=0.644, G=0.356	0.787542138525172	1	NR	NA	NA	6e-08	rs174561	miR-1908-5p
rs174561	LDL cholesterol levels x alcohol consumption (regular vs non-regular drinkers) interaction (2df)	30698716	rs174566	chr11:61592362	A=0.644, G=0.356	0.787542138525172	1	NR	NA	NA	3e-47	rs174561	miR-1908-5p
rs174561	HDL cholesterol levels x alcohol consumption (regular vs non-regular drinkers) interaction (2df)	30698716	rs174566	chr11:61592362	A=0.644, G=0.356	0.787542138525172	1	NR	NA	NA	5e-06	rs174561	miR-1908-5p
rs174561	Asthma in any disease	36344522	rs174566	chr11:61592362	A=0.644, G=0.356	0.787542138525172	1	0.35	0.956954	0.94-0.97	1e-08	rs174561	miR-1908-5p
rs174561	Eosinophil count	34594039	rs174567	chr11:61593005	A=0.644, G=0.356	0.787542138525172	1	NR	0.0167	0.013-0.02	1e-19	rs174561	miR-1908-5p
rs174561	Asthma	34594039	rs174568	chr11:61593816	C=0.654, T=0.346	0.82267532424943	1	NR	0.0437	0.03-0.058	1e-09	rs174561	miR-1908-5p
rs174561	Asthma	32296059	rs1535	chr11:61597972	A=0.65, G=0.35	0.800249131213147	0.99495663508297	0.660367	1.04924	1.03626724958544-1.06237449777925	4e-14	rs174561	miR-1908-5p
rs174561	Lung cancer in ever smokers	28604730	rs2072113	chr11:61604967	C=0.854, T=0.146	0.378107538094319	0.980474928915932	0.872053	1.10811	1.06-1.16	4e-06	rs174561	miR-1908-5p
rs174561	Eosinophill percentage (UKB data field 30210)	39789286	rs174581	chr11:61606683	A=0.364, G=0.636	0.752996050180678	0.99484631147541	0.354481	0.0178371	0.014-0.022	3e-19	rs174561	miR-1908-5p
rs174561	Eosinophill count (UKB data field 30150)	39789286	rs174581	chr11:61606683	A=0.364, G=0.636	0.752996050180678	0.99484631147541	0.354481	0.01942	0.015-0.024	5e-22	rs174561	miR-1908-5p
rs174561	Adult onset asthma or fasting glucose levels	31669095	rs174583	chr11:61609750	C=0.637, T=0.363	0.756251056308364	0.994854351551111	NR	NA	NA	4e-17	rs174561	miR-1908-5p
rs174561	Nonatopic asthma or fasting glucose levels	31669095	rs174583	chr11:61609750	C=0.637, T=0.363	0.756251056308364	0.994854351551111	NR	NA	NA	4e-10	rs174561	miR-1908-5p
rs174561	Eosinophil count	32888493	rs174583	chr11:61609750	C=0.637, T=0.363	0.756251056308364	0.994854351551111	0.357684	NA	NA	4e-26	rs174561	miR-1908-5p
rs174561	Nonatopic asthma	31669095	rs174583	chr11:61609750	C=0.637, T=0.363	0.756251056308364	0.994854351551111	NR	NA	NA	1e-08	rs174561	miR-1908-5p
rs174561	Adult onset asthma or type 2 diabetes	31669095	rs174584	chr11:61610750	A=0.367, G=0.633	0.743336886244484	0.994822039786911	NR	NA	NA	2e-20	rs174561	miR-1908-5p
rs174561	Nonatopic asthma or type 2 diabetes	31669095	rs174584	chr11:61610750	A=0.367, G=0.633	0.743336886244484	0.994822039786911	NR	NA	NA	4e-11	rs174561	miR-1908-5p
rs174561	Asthma (adult onset)	31669095	rs174584	chr11:61610750	A=0.367, G=0.633	0.743336886244484	0.994822039786911	NR	NA	NA	4e-16	rs174561	miR-1908-5p
rs174561	Eosinophil percentage of white cells	32888494	rs174594	chr11:61619829	A=0.61, C=0.39	0.666932140010327	0.989256154215838	0.625305	0.0150673	0.011-0.02	5e-11	rs174561	miR-1908-5p
rs174561	Asthma (adult onset)	31036433	rs174621	chr11:61630104	A=0.23, G=0.77	0.302516806975398	0.664523778646461	0.772	1.071	1.046-1.097	1e-08	rs174561	miR-1908-5p
rs2413660	Body mass index	34594039	rs28489620	chr22:41804716	A=0.28, G=0.72	0.272140096344122	0.914320666480845	NR	0.0153	0.01-0.02	3e-09	rs2413660	miR-33a-5p
rs2413660	Body mass index	37280435	rs28489620	chr22:41804716	A=0.28, G=0.72	0.272140096344122	0.914320666480845	NR	0.0156988	0.011-0.02	3e-13	rs2413660	miR-33a-5p
rs2413660	Body mass index	30595370	rs28489620	chr22:41804716	A=0.28, G=0.72	0.272140096344122	0.914320666480845	NR	NA	NA	4e-12	rs2413660	miR-33a-5p
rs2413660	Body mass index	39134668	rs28489620	chr22:41804716	A=0.28, G=0.72	0.272140096344122	0.914320666480845	NR	0.0144947	0.01-0.019	2e-10	rs2413660	miR-33a-5p
rs2413660	Body mass index (MTAG)	36376304	rs28489620	chr22:41804716	A=0.28, G=0.72	0.272140096344122	0.914320666480845	NR	0.01595	0.011-0.02	4e-12	rs2413660	miR-33a-5p
rs2413660	Smoking initiation	36477530	rs62236532	chr22:41987914	A=0.582, T=0.418	0.534409781590433	0.94260909251211	0.402	0.00592	0.0044-0.0075	9e-14	rs2413660	miR-33a-5p
rs2413660	Intelligence	29942086	rs28741121	chr22:42025823	A=0.181, G=0.819	0.162992364645309	0.93965641345554	NR	6.609	-	4e-11	rs2413660	miR-33a-5p
rs2413660	Fluid intelligence score (baseline)	40374629	rs28741121	chr22:42025823	A=0.181, G=0.819	0.162992364645309	0.93965641345554	0.828581	0.0207182	0.014-0.028	4e-09	rs2413660	miR-33a-5p
rs2413660	Intelligence	36378351	rs28741121	chr22:42025823	A=0.181, G=0.819	0.162992364645309	0.93965641345554	NR	NA	NA	1e-10	rs2413660	miR-33a-5p
rs2413660	Attention deficit hyperactivity disorder or autism spectrum disorder or intelligence (pleiotropy)	35764056	rs28741121	chr22:42025823	A=0.181, G=0.819	0.162992364645309	0.93965641345554	NR	NA	NA	7e-10	rs2413660	miR-33a-5p
rs2413660	Smoking initiation (ever regular vs never regular) (MTAG)	30643251	rs7287010	chr22:42234937	C=0.43, T=0.57	0.618815087705581	0.989854473209153	0.55	0.0068988	0.0048-0.009	2e-10	rs2413660	miR-33a-5p
rs2413660	Intelligence	36378351	rs9607850	chr22:42235352	C=0.538, T=0.462	0.956637382412072	0.991879827910468	NR	NA	NA	8e-09	rs2413660	miR-33a-5p
rs2413660	Intelligence	29942086	rs719440	chr22:42251810	G=0.475, T=0.525	0.735904684247119	0.986214394036287	NR	5.607	-	2e-08	rs2413660	miR-33a-5p
rs2413660	Intelligence	29942086	rs2267442	chr22:42280361	A=0.635, G=0.365	0.440632106911404	0.958104779696108	NR	5.522	-	3e-08	rs2413660	miR-33a-5p
rs2413660	Birth weight	23202124	rs5758511	chr22:42336172	A=0.266, G=0.734	0.246739297740967	0.901648960437985	0.27	0.027	0.015-0.039	3e-06	rs2413660	miR-33a-5p
rs2413660	Intelligence	29942086	rs5751191	chr22:42370991	C=0.51, T=0.49	0.190983510913704	0.487630317900387	NR	6.089	-	1e-09	rs2413660	miR-33a-5p
rs2413660	Attention deficit hyperactivity disorder or autism spectrum disorder or intelligence (pleiotropy)	35764056	rs5751191	chr22:42370991	C=0.51, T=0.49	0.190983510913704	0.487630317900387	NR	NA	NA	1e-08	rs2413660	miR-33a-5p
rs2413660	Intelligence	29942086	rs9607868	chr22:42414181	A=0.28, G=0.72	0.15081441335544	0.680649756883149	NR	5.542	-	3e-08	rs2413660	miR-33a-5p
rs2413660	Intelligence	28530673	rs36093924	chr22:42538399	C=0.534, T=0.466	0.240174529412886	0.50097988989453	0.4595	6.306	NA	3e-10	rs2413660	miR-33a-5p
rs2413660	Intelligence	28530673	rs36093924	chr22:42538399	C=0.534, T=0.466	0.240174529412886	0.50097988989453	0.4595	6.306	NA	3e-10	rs2413660	miR-33a-5p
rs2413660	Intelligence	36378351	rs36093924	chr22:42538399	C=0.534, T=0.466	0.240174529412886	0.50097988989453	NR	NA	NA	4e-10	rs2413660	miR-33a-5p
rs2413660	Fluid intelligence score (baseline)	40374629	rs2743461	chr22:42540551	A=0.537, G=0.463	0.22632450013577	0.483414200226427	0.53129	0.0185253	0.013-0.024	2e-12	rs2413660	miR-33a-5p
rs2413660	Intelligence (MTAG)	29326435	rs2743461	chr22:42540551	A=0.537, G=0.463	0.22632450013577	0.483414200226427	NR	0.0184331	0.012-0.024	2e-09	rs2413660	miR-33a-5p
rs2413660	Body mass index	37280435	rs5751239	chr22:42592239	C=0.472, T=0.528	0.154329476046193	0.454341530682602	NR	0.0109723	0.0072-0.0148	4e-08	rs2413660	miR-33a-5p
rs2413660	Body mass index	36581621	rs5751239	chr22:42592239	C=0.472, T=0.528	0.154329476046193	0.454341530682602	NR	0.0119	0.009-0.0148	6e-15	rs2413660	miR-33a-5p
rs2413660	Body mass index (MTAG)	36376304	rs5751239	chr22:42592239	C=0.472, T=0.528	0.154329476046193	0.454341530682602	NR	0.009881	0.0065-0.0132	6e-09	rs2413660	miR-33a-5p
rs2413660	Body mass index	29273807	rs5758651	chr22:42609148	C=0.196, T=0.804	0.122871056562025	0.777004411145346	0.8029	0.0122	0.0079-0.0165	3e-08	rs2413660	miR-33a-5p
rs2413660	Body mass index	25673413	rs134871	chr22:42652716	C=0.516, T=0.484	0.185102237528204	0.485828035472503	0.497	0.013	0.0075-0.0189/2	7e-06	rs2413660	miR-33a-5p
rs2413660	Lifetime smoking (without educational attainment)	34855049	rs762995	chr22:42672124	A=0.467, G=0.533	0.16645024630498	0.476577162501161	NR	NA	NA	2e-09	rs2413660	miR-33a-5p
rs2413660	Lifetime smoking	34855049	rs762995	chr22:42672124	A=0.467, G=0.533	0.16645024630498	0.476577162501161	NR	NA	NA	2e-09	rs2413660	miR-33a-5p
rs2413660	Smoking status	30595370	rs762995	chr22:42672124	A=0.467, G=0.533	0.16645024630498	0.476577162501161	NR	NA	NA	4e-10	rs2413660	miR-33a-5p
rs2413660	Smoking status (standard GWA)	37106081	rs762995	chr22:42672124	A=0.467, G=0.533	0.16645024630498	0.476577162501161	NR	0.0096013	0.0062-0.013	4e-08	rs2413660	miR-33a-5p
rs2413660	Smoking status (weighted GWA)	37106081	rs762995	chr22:42672124	A=0.467, G=0.533	0.16645024630498	0.476577162501161	NR	0.016967	0.0094-0.0245	1e-05	rs2413660	miR-33a-5p
rs2427550	Body mass index	36581621	rs8567	chr20:62522315	A=0.506, G=0.494	0.198959756472991	0.8235335391524	NR	0.0094	0.0065-0.0123	2e-10	rs2427550	miR-941
rs2596477	Waist-to-hip ratio adjusted for BMI	34021172	rs149405105	chr6:30976349	A=0.048, G=0.952	0.173800320225158	0.779643691588785	NR	0.0337227	0.022-0.045	2e-08	rs2596477	miR-6891-3p
rs2596477	Waist circumference adjusted for body mass index	34021172	rs149405105	chr6:30976349	A=0.048, G=0.952	0.173800320225158	0.779643691588785	NR	0.0380088	0.026-0.05	3e-10	rs2596477	miR-6891-3p
rs2596477	Psoriasis	39885523	rs9263580	chr6:31070096	C=0.903, T=0.097	0.174519430914529	0.532304978065993	NR	0.211697	0.15-0.27	1e-25	rs2596477	miR-6891-3p
rs2596477	Waist-to-hip ratio adjusted for BMI	34021172	rs1265051	chr6:31080704	G=0.186, T=0.814	0.119153790033394	0.394025234025234	NR	0.0200002	0.013-0.027	2e-08	rs2596477	miR-6891-3p
rs2596477	Waist-to-hip ratio adjusted for BMI	34021172	rs1265093	chr6:31107187	A=0.276, G=0.724	0.240288425519213	0.723626373626374	NR	0.0205689	0.015-0.027	2e-11	rs2596477	miR-6891-3p
rs2596477	Hip circumference adjusted for BMI	34021172	rs1265093	chr6:31107187	A=0.276, G=0.724	0.240288425519213	0.723626373626374	NR	0.0223747	0.016-0.029	2e-11	rs2596477	miR-6891-3p
rs2596477	Hospitalized COVID-19 or BMI (pleiotropy)	38352709	rs1265093	chr6:31107187	A=0.276, G=0.724	0.240288425519213	0.723626373626374	NR	NA	NA	1e-08	rs2596477	miR-6891-3p
rs2596477	Psoriasis	39885523	rs6909939	chr6:31140518	A=0.147, G=0.853	0.222948910285359	0.475909320535489	NR	0.213607	0.19-0.23	3e-35	rs2596477	miR-6891-3p
rs2596477	Eosinophill count (UKB data field 30150)	39789286	rs6909939	chr6:31140518	A=0.147, G=0.853	0.222948910285359	0.475909320535489	0.149835	0.0219627	0.016-0.028	5e-16	rs2596477	miR-6891-3p
rs2596477	Waist-to-hip ratio adjusted for BMI	34021172	rs9263869	chr6:31170014	C=0.33, T=0.67	0.128914239837411	0.601978239366963	NR	0.0173241	0.011-0.023	1e-08	rs2596477	miR-6891-3p
rs2596477	Hip circumference adjusted for BMI	34021172	rs9263869	chr6:31170014	C=0.33, T=0.67	0.128914239837411	0.601978239366963	NR	0.0208071	0.014-0.027	3e-10	rs2596477	miR-6891-3p
rs2596477	Waist-to-hip ratio adjusted for BMI	34021172	rs9501519	chr6:31177510	C=0.539, T=0.461	0.19965670361163	0.987626076260763	NR	0.0187496	0.013-0.024	3e-11	rs2596477	miR-6891-3p
rs2596477	Waist-to-hip ratio adjusted for BMI	34021172	rs9501520	chr6:31177658	C=0.462, T=0.538	0.198850545615599	0.987603203943315	NR	0.0200324	0.014-0.026	2e-10	rs2596477	miR-6891-3p
rs2596477	Hip circumference adjusted for BMI	34021172	rs17191272	chr6:31178198	C=0.46, G=0.54	0.195483793650512	0.975297728667894	NR	0.020396	0.014-0.026	3e-11	rs2596477	miR-6891-3p
rs2596477	Waist-to-hip ratio adjusted for BMI	34021172	rs1793892	chr6:31221351	C=0.083, T=0.917	0.249112175276041	0.692200712060525	NR	0.0258258	0.017-0.034	2e-09	rs2596477	miR-6891-3p
rs2596477	Systolic blood pressure (weighted GWA)	37106081	rs2524099	chr6:31236051	A=0.518, G=0.482	0.149871742716866	0.958515463917526	NR	0.43788	0.27-0.61	4e-07	rs2596477	miR-6891-3p
rs2596477	Eosinophil count	34469753	rs3207561	chr6:31236685	A=0.61, G=0.39	0.101054464740019	0.606775244299674	0.623	NA	NA	4e-27	rs2596477	miR-6891-3p
rs2596477	Waist-to-hip ratio adjusted for BMI	34021172	rs1050420	chr6:31239518	C=0.569, T=0.431	0.165913164440825	0.847575757575758	NR	0.0196904	0.014-0.025	1e-11	rs2596477	miR-6891-3p
rs2596477	Hip circumference adjusted for BMI	34021172	rs1050420	chr6:31239518	C=0.569, T=0.431	0.165913164440825	0.847575757575758	NR	0.016265	0.011-0.022	2e-08	rs2596477	miR-6891-3p
rs2596477	Waist-to-hip ratio adjusted for BMI	34021172	rs2844620	chr6:31242151	C=0.416, T=0.584	0.120605531432863	0.983955342902711	NR	0.0208679	0.015-0.027	4e-11	rs2596477	miR-6891-3p
rs2596477	Waist-to-hip ratio adjusted for BMI	34021172	rs2844620	chr6:31242151	C=0.416, T=0.584	0.120605531432863	0.983955342902711	NR	0.0254568	0.02-0.031	4e-19	rs2596477	miR-6891-3p
rs2596477	Hip circumference adjusted for BMI	34021172	rs35989257	chr6:31242509	C=0.728, T=0.272	0.271670773383653	0.761785063752277	NR	0.0198497	0.013-0.027	6e-09	rs2596477	miR-6891-3p
rs2596477	Waist-to-hip ratio adjusted for BMI	34021172	rs2844616	chr6:31242639	C=0.402, T=0.598	0.131755634780418	0.710343300110742	NR	0.0240156	0.018-0.03	5e-17	rs2596477	miR-6891-3p
rs2596477	Hip circumference adjusted for BMI	34021172	rs2844616	chr6:31242639	C=0.402, T=0.598	0.131755634780418	0.710343300110742	NR	0.0267883	0.021-0.033	7e-18	rs2596477	miR-6891-3p
rs2596477	Hip circumference adjusted for BMI	34021172	rs2853946	chr6:31247203	A=0.649, T=0.351	0.220844023781638	0.825400714650332	NR	0.0200045	0.014-0.026	2e-09	rs2596477	miR-6891-3p
rs2596477	Waist-to-hip ratio adjusted for BMI	34021172	rs2853943	chr6:31247871	C=0.228, T=0.772	0.268501065182696	0.672003432003432	NR	0.0232178	0.017-0.03	2e-12	rs2596477	miR-6891-3p
rs2596477	Waist-to-hip ratio adjusted for BMI	34021172	rs2853940	chr6:31249732	C=0.406, T=0.594	0.228840426618037	0.943924191750279	NR	0.0246751	0.019-0.03	3e-17	rs2596477	miR-6891-3p
rs2596477	Eczema	34785669	rs2844594	chr6:31258393	A=0.175, G=0.825	0.17381450206092	0.458618473895582	0.1766	1.12	NA	3e-14	rs2596477	miR-6891-3p
rs2596477	Psoriasis	39885523	rs2524162	chr6:31259750	C=0.864, T=0.136	0.149831705625597	0.408094003683744	NR	0.240831	0.22-0.27	3e-38	rs2596477	miR-6891-3p
rs2596477	Waist-to-hip ratio adjusted for BMI	34021172	rs2524045	chr6:31268115	G=0.175, T=0.825	0.108086374597796	0.361654618473896	NR	0.022607	0.016-0.029	7e-11	rs2596477	miR-6891-3p
rs2596477	Psoriasis	39885523	rs9264794	chr6:31270304	A=0.919, G=0.081	0.135748941464829	0.521201107649706	NR	0.248728	0.18-0.32	1e-28	rs2596477	miR-6891-3p
rs2596477	Waist-to-hip ratio adjusted for BMI	34021172	rs3094691	chr6:31274693	A=0.491, G=0.509	0.176891808127633	0.986901041666667	NR	0.0192715	0.013-0.025	1e-09	rs2596477	miR-6891-3p
rs2596477	Weight	28552196	rs3132479	chr6:31274752	A=0.487, G=0.513	0.161880046903931	0.986312925170068	0.5388	0.0369	0.023-0.051	2e-07	rs2596477	miR-6891-3p
rs2596477	Hip circumference adjusted for BMI	34021172	rs3132479	chr6:31274752	A=0.487, G=0.513	0.161880046903931	0.986312925170068	NR	0.019918	0.014-0.025	2e-12	rs2596477	miR-6891-3p
rs2596477	Hip circumference adjusted for BMI	34021172	rs3132479	chr6:31274752	A=0.487, G=0.513	0.161880046903931	0.986312925170068	NR	0.0234978	0.017-0.03	3e-14	rs2596477	miR-6891-3p
rs2596477	Hip circumference adjusted for BMI	34021172	rs9265902	chr6:31313469	A=0.274, G=0.726	0.207597140042192	0.669260273972603	NR	0.0207461	0.014-0.027	1e-09	rs2596477	miR-6891-3p
rs2596477	Hip circumference adjusted for BMI	34021172	rs9265906	chr6:31313602	A=0.557, C=0.443	0.115505996161299	0.724547619047619	NR	0.0168982	0.011-0.023	5e-08	rs2596477	miR-6891-3p
rs2596477	Psoriasis	39885523	rs2523617	chr6:31318478	C=0.068, G=0.932	0.141681946038284	0.58521165475536	NR	0.30678	0.26-0.36	1e-22	rs2596477	miR-6891-3p
rs2596477	Waist-to-hip ratio adjusted for BMI	34021172	rs9266059	chr6:31319222	C=0.419, T=0.581	0.107299998124126	0.920537124802528	NR	0.0219789	0.016-0.028	7e-15	rs2596477	miR-6891-3p
rs2596477	Hip circumference adjusted for BMI	34021172	rs9266059	chr6:31319222	C=0.419, T=0.581	0.107299998124126	0.920537124802528	NR	0.0197526	0.014-0.025	3e-12	rs2596477	miR-6891-3p
rs2596477	Hip circumference adjusted for BMI	34021172	rs9266059	chr6:31319222	C=0.419, T=0.581	0.107299998124126	0.920537124802528	NR	0.0216682	0.016-0.028	2e-12	rs2596477	miR-6891-3p
rs2596477	Psoriasis	39885523	rs28380929	chr6:31319603	C=0.935, T=0.065	0.27633941947029	0.837275341480949	NR	0.178123	0.14-0.21	2e-09	rs2596477	miR-6891-3p
rs2596477	Waist-to-hip ratio adjusted for BMI	34021172	rs2596501	chr6:31321211	C=0.466, T=0.534	0.140194468134894	0.957100213219616	NR	0.0231594	0.018-0.029	2e-16	rs2596477	miR-6891-3p
rs2596477	Hip circumference adjusted for BMI	34021172	rs2596501	chr6:31321211	C=0.466, T=0.534	0.140194468134894	0.957100213219616	NR	0.0173579	0.012-0.023	7e-10	rs2596477	miR-6891-3p
rs2596477	Hip circumference adjusted for BMI	34021172	rs2596501	chr6:31321211	C=0.466, T=0.534	0.140194468134894	0.957100213219616	NR	0.0201678	0.014-0.026	5e-11	rs2596477	miR-6891-3p
rs2596477	Waist-to-hip ratio adjusted for BMI	34021172	rs2768	chr6:31321856	A=0.728, G=0.272	0.459603388215474	0.990837887067395	NR	0.0196291	0.013-0.027	4e-08	rs2596477	miR-6891-3p
rs2596477	Waist-to-hip ratio adjusted for BMI	34021172	rs2768	chr6:31321856	A=0.728, G=0.272	0.459603388215474	0.990837887067395	NR	0.0206722	0.014-0.027	2e-10	rs2596477	miR-6891-3p
rs2596477	Waist circumference adjusted for body mass index	34021172	rs2768	chr6:31321856	A=0.728, G=0.272	0.459603388215474	0.990837887067395	NR	0.0190456	0.013-0.025	5e-09	rs2596477	miR-6891-3p
rs2596477	Asthma (age of onset)	31036433	rs1093	chr6:31321906	A=0.815, G=0.185	0.747468293009731	0.983642276422764	0.212	0.994	0.68-1.31	8e-10	rs2596477	miR-6891-3p
rs2596477	Waist-to-hip ratio adjusted for BMI	34021172	rs1055890	chr6:31321915	A=0.589, G=0.411	0.245947640874023	0.988690275435638	NR	0.0184831	0.013-0.024	2e-10	rs2596477	miR-6891-3p
rs2596477	Hip circumference adjusted for BMI	34021172	rs3819306	chr6:31322133	A=0.542, G=0.458	0.135569146770578	0.956355748373102	NR	0.0189605	0.013-0.025	3e-09	rs2596477	miR-6891-3p
rs2596477	Asthma	27182965	rs2428494	chr6:31322197	A=0.407, T=0.593	0.255781139318602	1	NR	1.08696	1.06-1.11	1e-16	rs2596477	miR-6891-3p
rs2596477	Asthma	31619474	rs2428494	chr6:31322197	A=0.407, T=0.593	0.255781139318602	1	0.476146	1.06803	1.05-1.09	2e-14	rs2596477	miR-6891-3p
rs2596477	Allergic rhinitis	30013184	rs2428494	chr6:31322197	A=0.407, T=0.593	0.255781139318602	1	0.4226	1.08	1.06-1.09	7e-19	rs2596477	miR-6891-3p
rs2596477	Asthma (childhood onset)	31036433	rs2428494	chr6:31322197	A=0.407, T=0.593	0.255781139318602	1	0.477	1.157	1.124-1.191	8e-23	rs2596477	miR-6891-3p
rs2596477	Asthma (adult onset)	31036433	rs2428494	chr6:31322197	A=0.407, T=0.593	0.255781139318602	1	0.477	1.104	1.082-1.126	5e-23	rs2596477	miR-6891-3p
rs2596477	Asthma	30929738	rs2428494	chr6:31322197	A=0.407, T=0.593	0.255781139318602	1	NR	1.118	1.1-1.13	2e-60	rs2596477	miR-6891-3p
rs2596477	Takes medication for asthma?	39024449	rs2428494	chr6:31322197	A=0.407, T=0.593	0.255781139318602	1	0.5815	0.07273	0.053-0.092	1e-11	rs2596477	miR-6891-3p
rs2596477	Asthma	39024449	rs2428494	chr6:31322197	A=0.407, T=0.593	0.255781139318602	1	0.5815	0.07572	0.059-0.092	2e-16	rs2596477	miR-6891-3p
rs2596477	Hip circumference adjusted for BMI	34021172	rs2308655	chr6:31322303	C=0.55, G=0.45	0.139326895425338	0.985194996320824	NR	0.0206461	0.015-0.026	2e-12	rs2596477	miR-6891-3p
rs2596477	Allergic disease (asthma, hay fever or eczema)	29083406	rs2854001	chr6:31323012	A=0.212, G=0.788	0.641407288397968	0.991542664985288	0.18	1.059	1.05-1.07	1e-19	rs2596477	miR-6891-3p
rs2596477	Allergic disease (asthma, hay fever and/or eczema) (age of onset)	32603359	rs2854001	chr6:31323012	A=0.212, G=0.788	0.641407288397968	0.991542664985288	0.237	0.035	0.025-0.045	5e-13	rs2596477	miR-6891-3p
rs2596477	Allergic disease (asthma, hay fever and/or eczema) (multivariate analysis)	32603359	rs2854001	chr6:31323012	A=0.212, G=0.788	0.641407288397968	0.991542664985288	0.237	0.037	0.027-0.047	1e-13	rs2596477	miR-6891-3p
rs2596477	Asthma	30929738	rs3190923	chr6:31324499	C=0.917, G=0.083	0.284920079463265	0.745130052921968	NR	1.129	1.1-1.15	9e-22	rs2596477	miR-6891-3p
rs2596477	Waist-to-hip ratio adjusted for BMI	34021172	rs1050529	chr6:31324615	C=0.756, T=0.244	0.228186863923606	0.647481384143671	NR	0.0196216	0.014-0.026	1e-10	rs2596477	miR-6891-3p
rs2596477	Sex hormone-binding globulin levels adjusted for BMI	32042192	rs9266184	chr6:31324664	G=0.283, T=0.717	0.154691427022021	0.590716597318539	0.681894	0.0114334	0.0089-0.0139	6e-21	rs2596477	miR-6891-3p
rs2596477	Sex hormone-binding globulin levels adjusted for BMI	32042192	rs9266184	chr6:31324664	G=0.283, T=0.717	0.154691427022021	0.590716597318539	0.681489	0.0111127	0.0093-0.0129	3e-38	rs2596477	miR-6891-3p
rs2596477	Hip circumference adjusted for BMI	34021172	rs1131156	chr6:31324895	C=0.545, G=0.455	0.121849897122682	0.912139737991266	NR	0.0188501	0.013-0.025	1e-09	rs2596477	miR-6891-3p
rs2596477	Waist-to-hip ratio adjusted for BMI	34021172	rs9266209	chr6:31325004	A=0.582, G=0.418	0.126108315360652	1	NR	0.0185837	0.012-0.025	3e-09	rs2596477	miR-6891-3p
rs2596477	Hip circumference adjusted for BMI	34021172	rs9266209	chr6:31325004	A=0.582, G=0.418	0.126108315360652	1	NR	0.0202182	0.014-0.026	4e-11	rs2596477	miR-6891-3p
rs2596477	Hip circumference adjusted for BMI	34021172	rs9266225	chr6:31325193	C=0.406, T=0.594	0.119557403181946	1	NR	0.0204683	0.014-0.027	9e-10	rs2596477	miR-6891-3p
rs2596477	Waist-to-hip ratio adjusted for BMI	34021172	rs9266253	chr6:31325847	C=0.824, G=0.176	0.768468621232967	0.967639726578207	NR	0.021803	0.015-0.029	8e-10	rs2596477	miR-6891-3p
rs2596477	Hip circumference adjusted for BMI	34021172	rs28694041	chr6:31325851	G=0.576, T=0.424	0.226730205175682	0.976833621185953	NR	0.0237224	0.018-0.029	4e-17	rs2596477	miR-6891-3p
rs2596477	Waist-to-hip ratio adjusted for BMI	34021172	rs9266255	chr6:31325880	A=0.576, G=0.424	0.226730205175682	0.976833621185953	NR	0.0189485	0.013-0.025	1e-09	rs2596477	miR-6891-3p
rs2596477	Hip circumference adjusted for BMI	34021172	rs9266255	chr6:31325880	A=0.576, G=0.424	0.226730205175682	0.976833621185953	NR	0.0284303	0.022-0.034	2e-20	rs2596477	miR-6891-3p
rs2596477	Waist-to-hip ratio adjusted for BMI	34021172	rs9266271	chr6:31326082	C=0.412, T=0.588	0.244930349005039	0.988671171171171	NR	0.0254246	0.02-0.031	6e-18	rs2596477	miR-6891-3p
rs2596477	Hip circumference adjusted for BMI	34021172	rs9266271	chr6:31326082	C=0.412, T=0.588	0.244930349005039	0.988671171171171	NR	0.0209457	0.015-0.027	1e-12	rs2596477	miR-6891-3p
rs2596477	Hip circumference adjusted for BMI	34021172	rs9266271	chr6:31326082	C=0.412, T=0.588	0.244930349005039	0.988671171171171	NR	0.0177807	0.011-0.024	3e-08	rs2596477	miR-6891-3p
rs2596477	prostate-specific antigen (PSA, maximum, inv-norm transformed)	39024449	rs9266271	chr6:31326082	C=0.412, T=0.588	0.244930349005039	0.988671171171171	0.621	0.02566	0.019-0.032	1e-15	rs2596477	miR-6891-3p
rs2596477	prostate-specific antigen (PSA, mean, inv-norm transformed)	39024449	rs9266271	chr6:31326082	C=0.412, T=0.588	0.244930349005039	0.988671171171171	0.621	0.02419	0.018-0.031	7e-14	rs2596477	miR-6891-3p
rs2596477	Hip circumference adjusted for BMI	34021172	rs73390208	chr6:31326131	C=0.618, T=0.382	0.108182828980978	1	NR	0.0177817	0.012-0.024	2e-08	rs2596477	miR-6891-3p
rs2596477	Hip circumference adjusted for BMI	34021172	rs9405084	chr6:31326251	C=0.591, T=0.409	0.121043744600644	1	NR	0.0243425	0.018-0.031	1e-13	rs2596477	miR-6891-3p
rs2596477	Hip circumference adjusted for BMI	34021172	rs9378248	chr6:31326289	A=0.44, G=0.56	0.1378836672698	1	NR	0.0207417	0.015-0.027	3e-12	rs2596477	miR-6891-3p
rs2596477	Waist-to-hip ratio adjusted for BMI	34021172	rs2523589	chr6:31327334	G=0.438, T=0.562	0.136775287403854	1	NR	0.0182205	0.012-0.024	5e-09	rs2596477	miR-6891-3p
rs2596477	Waist-to-hip ratio adjusted for BMI	34021172	rs2523589	chr6:31327334	G=0.438, T=0.562	0.136775287403854	1	NR	0.0220143	0.017-0.028	4e-15	rs2596477	miR-6891-3p
rs2596477	Hip circumference adjusted for BMI	34021172	rs2523589	chr6:31327334	G=0.438, T=0.562	0.136775287403854	1	NR	0.0176998	0.012-0.023	3e-10	rs2596477	miR-6891-3p
rs2596477	Eosinophil count	35935937	rs2523589	chr6:31327334	G=0.438, T=0.562	0.136775287403854	1	0.497	0.049	0.041-0.057	9e-41	rs2596477	miR-6891-3p
rs2596477	Waist-to-hip ratio adjusted for BMI	34021172	rs2428493	chr6:31329135	A=0.413, C=0.587	0.24954960027024	1	NR	0.0162701	0.011-0.022	1e-08	rs2596477	miR-6891-3p
rs2596477	Hip circumference adjusted for BMI	34021172	rs2428493	chr6:31329135	A=0.413, C=0.587	0.24954960027024	1	NR	0.0172826	0.011-0.023	3e-08	rs2596477	miR-6891-3p
rs2596477	Hip circumference adjusted for BMI	34021172	rs2428491	chr6:31329365	C=0.586, T=0.414	0.15276833226208	0.784022598870057	NR	0.018086	0.012-0.024	7e-09	rs2596477	miR-6891-3p
rs2596477	Psoriasis	39885523	rs9266303	chr6:31329609	G=0.846, T=0.154	0.236327614948973	0.495620838229534	NR	0.215238	0.2-0.23	5e-45	rs2596477	miR-6891-3p
rs2596477	Waist circumference adjusted for body mass index	34021172	rs2523570	chr6:31329734	C=0.783, T=0.217	0.633413358484095	1	NR	0.0207915	0.014-0.027	1e-09	rs2596477	miR-6891-3p
rs2596477	Hip circumference adjusted for BMI	34021172	rs4959062	chr6:31331500	C=0.513, G=0.487	0.166404042599435	1	NR	0.0197814	0.014-0.025	7e-12	rs2596477	miR-6891-3p
rs2596477	Eosinophil count	32888494	rs2523548	chr6:31332527	A=0.437, G=0.563	0.136224034873353	1	0.433296	0.0290011	0.024-0.034	1e-28	rs2596477	miR-6891-3p
rs2596477	Hip circumference adjusted for BMI	34021172	rs9266361	chr6:31332919	C=0.512, T=0.488	0.167067416749841	1	NR	0.026028	0.02-0.032	1e-16	rs2596477	miR-6891-3p
rs2596477	Prostate-specific antigen levels	39930085	rs2844580	chr6:31333303	C=0.352, T=0.648	0.322746713131633	1	NR	0.0109	0.0073-0.0145	4e-09	rs2596477	miR-6891-3p
rs2596477	Psoriasis	39885523	rs2844579	chr6:31333716	A=0.189, G=0.811	0.752582390555829	1	NR	0.192362	0.15-0.24	2e-30	rs2596477	miR-6891-3p
rs2596477	Eosinophil count	34469753	rs2844575	chr6:31334945	C=0.479, T=0.521	0.190502966611083	1	0.536	NA	NA	2e-53	rs2596477	miR-6891-3p
rs2596477	Hip circumference adjusted for BMI	34021172	rs2844575	chr6:31334945	C=0.479, T=0.521	0.190502966611083	1	NR	0.0207917	0.015-0.027	1e-11	rs2596477	miR-6891-3p
rs2596477	Psoriasis	39885523	rs3957111	chr6:31344490	A=0.128, G=0.872	0.133445393978851	0.398717670071724	NR	0.188472	0.13-0.25	3e-15	rs2596477	miR-6891-3p
rs2596477	Eosinophil percentage of white cells	35121771	rs2523632	chr6:31345844	A=0.101, G=0.899	0.195235666903433	0.550645959318307	0.105491	0.316713	NA	6e-11	rs2596477	miR-6891-3p
rs2596477	Visceral adipose tissue volumes (adjusted for BMI and height)	35773277	rs9266627	chr6:31346805	A=0.659, G=0.341	0.338716928694041	1	0.661	0.059	0.037-0.081	2e-08	rs2596477	miR-6891-3p
rs2596477	Asthma (adult onset)	31669095	rs9266629	chr6:31346822	C=0.195, T=0.805	0.165720023523428	0.47837037037037	NR	NA	NA	4e-09	rs2596477	miR-6891-3p
rs2596477	Waist-to-hip ratio adjusted for BMI	34021172	rs9266634	chr6:31346978	A=0.394, T=0.606	0.113758235023748	1	NR	0.0175518	0.011-0.024	2e-08	rs2596477	miR-6891-3p
rs2596477	Waist-to-hip ratio adjusted for BMI	34021172	rs9266634	chr6:31346978	A=0.394, T=0.606	0.113758235023748	1	NR	0.0224814	0.017-0.028	2e-15	rs2596477	miR-6891-3p
rs2596477	Waist-to-hip ratio adjusted for BMI	34021172	rs2844543	chr6:31347204	A=0.437, T=0.563	0.136224034873353	1	NR	0.0196225	0.014-0.025	3e-12	rs2596477	miR-6891-3p
rs2596477	Hip circumference adjusted for BMI	34021172	rs2844543	chr6:31347204	A=0.437, T=0.563	0.136224034873353	1	NR	0.0186102	0.013-0.024	4e-11	rs2596477	miR-6891-3p
rs2596477	Hip circumference adjusted for BMI	34021172	rs2844543	chr6:31347204	A=0.437, T=0.563	0.136224034873353	1	NR	0.0252366	0.019-0.031	2e-16	rs2596477	miR-6891-3p
rs2596477	Waist-to-hip ratio adjusted for BMI	34021172	rs2905715	chr6:31351530	C=0.344, T=0.656	0.334260709848198	1	NR	0.0211485	0.015-0.028	1e-10	rs2596477	miR-6891-3p
rs2596477	Waist-to-hip ratio adjusted for BMI	34021172	rs2905715	chr6:31351530	C=0.344, T=0.656	0.334260709848198	1	NR	0.0208764	0.015-0.027	1e-12	rs2596477	miR-6891-3p
rs2596477	Waist circumference adjusted for body mass index	34021172	rs2905715	chr6:31351530	C=0.344, T=0.656	0.334260709848198	1	NR	0.0181976	0.012-0.024	9e-10	rs2596477	miR-6891-3p
rs2596477	Hip circumference adjusted for BMI	34021172	rs2905715	chr6:31351530	C=0.344, T=0.656	0.334260709848198	1	NR	0.0177635	0.011-0.024	3e-08	rs2596477	miR-6891-3p
rs2596477	Self-reported allergy	23817569	rs9266772	chr6:31352113	C=0.203, T=0.797	0.68890874106652	1	0.1882	0.104	0.075-0.133	3e-12	rs2596477	miR-6891-3p
rs2596477	Hip circumference adjusted for BMI	34021172	rs7775759	chr6:31352446	A=0.375, G=0.625	0.105028750575754	1	NR	0.0216624	0.015-0.028	1e-11	rs2596477	miR-6891-3p
rs2596477	Hip circumference adjusted for BMI	25673412	rs7741091	chr6:31352631	A=0.625, G=0.375	0.105028750575754	1	0.6701	0.0306	0.02-0.041	2e-08	rs2596477	miR-6891-3p
rs2596477	Hip circumference adjusted for BMI	25673412	rs7741091	chr6:31352631	A=0.625, G=0.375	0.105028750575754	1	0.6701	0.0202	0.013-0.028	8e-08	rs2596477	miR-6891-3p
rs2596477	Waist-to-hip ratio adjusted for BMI	34021172	rs9266791	chr6:31358943	C=0.537, T=0.463	0.138443892922243	0.956824034334764	NR	0.0195742	0.013-0.026	5e-10	rs2596477	miR-6891-3p
rs2596477	Waist-to-hip ratio adjusted for BMI	34021172	rs9266791	chr6:31358943	C=0.537, T=0.463	0.138443892922243	0.956824034334764	NR	0.0226999	0.017-0.028	9e-16	rs2596477	miR-6891-3p
rs2596477	Hip circumference adjusted for BMI	34021172	rs9266791	chr6:31358943	C=0.537, T=0.463	0.138443892922243	0.956824034334764	NR	0.0165754	0.011-0.022	4e-09	rs2596477	miR-6891-3p
rs2596477	Hip circumference adjusted for BMI	34021172	rs9266791	chr6:31358943	C=0.537, T=0.463	0.138443892922243	0.956824034334764	NR	0.0232092	0.017-0.029	5e-14	rs2596477	miR-6891-3p
rs2596477	Type 1 diabetes and autoimmune thyroid diseases	25936594	rs2251396	chr6:31364707	A=0.242, G=0.758	0.101101884897427	0.42865880297073	NR	2.2132	NA	1e-22	rs2596477	miR-6891-3p
rs2596477	Hip circumference adjusted for BMI	34021172	rs2853975	chr6:31382717	A=0.786, T=0.214	0.12990395004732	0.448883270122208	NR	0.0197511	0.013-0.026	3e-09	rs2596477	miR-6891-3p
rs2596477	Waist-to-hip ratio adjusted for BMI	34021172	rs3128981	chr6:31405620	A=0.786, G=0.214	0.12990395004732	0.448883270122208	NR	0.0188491	0.012-0.026	3e-08	rs2596477	miR-6891-3p
rs2596477	Psoriasis	39885523	rs9267084	chr6:31409605	A=0.131, G=0.869	0.273905785382212	0.563739025771736	NR	0.301305	0.26-0.34	1e-91	rs2596477	miR-6891-3p
rs2596477	Asthma	29273806	rs2844510	chr6:31410408	G=0.866, T=0.134	0.117517087724834	0.364503288335064	0.11	0.09	0.051-0.129	2e-06	rs2596477	miR-6891-3p
rs2596477	Body mass index	38538606	rs2844510	chr6:31410408	G=0.866, T=0.134	0.117517087724834	0.364503288335064	NR	0.0219831	0.015-0.029	4e-09	rs2596477	miR-6891-3p
rs2596477	Asthma (childhood onset)	29273806	rs2596464	chr6:31412961	C=0.465, T=0.535	0.181855208831028	0.950136307311028	NR	1.12	1.08-1.17	1e-08	rs2596477	miR-6891-3p
rs2596477	Asthma	29273806	rs2596464	chr6:31412961	C=0.465, T=0.535	0.181855208831028	0.950136307311028	0.48	0.09	0.07-0.11	2e-13	rs2596477	miR-6891-3p
rs2596477	Hay fever and/or eczema	31361310	rs2516466	chr6:31414327	G=0.479, T=0.521	0.17149632667939	0.948804071246819	0.5538	1.05641	1.04-1.07	4e-20	rs2596477	miR-6891-3p
rs2596477	Waist-to-hip ratio adjusted for BMI	34021172	rs2596473	chr6:31430799	G=0.496, T=0.504	0.133267869588649	0.879038076152305	NR	0.0219013	0.016-0.027	7e-15	rs2596477	miR-6891-3p
rs2596477	Waist-to-hip ratio adjusted for BMI	34021172	rs2284178	chr6:31432125	C=0.497, T=0.503	0.133872499353552	0.87928	NR	0.0209034	0.015-0.027	2e-11	rs2596477	miR-6891-3p
rs2596477	Hip circumference adjusted for BMI	34021172	rs2284178	chr6:31432125	C=0.497, T=0.503	0.133872499353552	0.87928	NR	0.0239755	0.018-0.03	5e-15	rs2596477	miR-6891-3p
rs2596477	Psoriasis	39885523	rs2516518	chr6:31435119	A=0.102, G=0.898	0.17653795671601	0.520778513746484	NR	0.235151	0.23-0.24	6e-18	rs2596477	miR-6891-3p
rs2596477	Waist-to-hip ratio adjusted for BMI	34021172	rs4713466	chr6:31435869	C=0.881, T=0.119	0.217034408556781	0.529906542056075	NR	0.0226314	0.015-0.031	4e-08	rs2596477	miR-6891-3p
rs2596477	Psoriasis	39885523	rs4713466	chr6:31435869	C=0.881, T=0.119	0.217034408556781	0.529906542056075	NR	0.167413	0.13-0.21	8e-21	rs2596477	miR-6891-3p
rs2596477	Waist-to-hip ratio adjusted for BMI	34021172	rs12195665	chr6:31461043	A=0.308, G=0.692	0.117763316255399	0.547107279693487	NR	0.0197044	0.014-0.026	3e-10	rs2596477	miR-6891-3p
rs2596477	Hip circumference adjusted for BMI	34021172	rs12202667	chr6:31461053	C=0.308, T=0.692	0.117763316255399	0.547107279693487	NR	0.018764	0.012-0.025	4e-08	rs2596477	miR-6891-3p
rs2596477	Waist-to-hip ratio adjusted for BMI	34021172	rs2904597	chr6:31461132	C=0.739, G=0.261	0.159001843868047	0.566729475100942	NR	0.0229697	0.016-0.03	3e-10	rs2596477	miR-6891-3p
rs2596477	Waist circumference adjusted for body mass index	34021172	rs2904597	chr6:31461132	C=0.739, G=0.261	0.159001843868047	0.566729475100942	NR	0.0218802	0.015-0.028	4e-11	rs2596477	miR-6891-3p
rs2596477	Waist-to-hip ratio adjusted for BMI	34021172	rs2534681	chr6:31462931	A=0.506, T=0.494	0.112559792714509	0.811079812206573	NR	0.0184043	0.013-0.024	6e-11	rs2596477	miR-6891-3p
rs2596477	Hip circumference adjusted for BMI	34021172	rs2534664	chr6:31469591	A=0.506, G=0.494	0.112559792714509	0.811079812206573	NR	0.0226003	0.017-0.029	2e-13	rs2596477	miR-6891-3p
rs2596477	Waist-to-hip ratio adjusted for BMI	34021172	rs2844498	chr6:31476854	C=0.543, T=0.457	0.138409992587664	0.815750915750916	NR	0.0226459	0.016-0.029	7e-13	rs2596477	miR-6891-3p
rs2596477	Seropositivity for shigella flexneri 2a str. 301 peptide (agilent_182601)	37164013	rs28366151	chr6:31592715	C=0.892, T=0.108	0.250531893874721	0.601067478350339	NR	5.48	NA	4e-08	rs2596477	miR-6891-3p
rs2596477	Body mass index	30239722	rs2178899	chr6:31606756	A=0.884, T=0.116	0.233875371377763	0.558031791676652	0.8833	0.0243	0.019-0.029	5e-23	rs2596477	miR-6891-3p
rs2596477	Body mass index (UKB data field 21001)	39789286	rs28366156	chr6:31671498	C=0.123, T=0.877	0.214144991011512	0.51663777509798	0.131369	0.0249314	0.019-0.031	2e-20	rs2596477	miR-6891-3p
rs2596477	Psoriasis	39885523	rs28366158	chr6:31676703	A=0.12, C=0.88	0.214297950051907	0.52407893720553	NR	0.110677	0.055-0.166	3e-09	rs2596477	miR-6891-3p
rs2596477	Body mass index	38538606	rs35604230	chr6:31768305	A=0.093, G=0.907	0.125758760374041	0.462393119904554	NR	0.0284158	0.021-0.036	1e-13	rs2596477	miR-6891-3p
rs2910211	Eosinophill percentage (UKB data field 30210)	39789286	rs4921283	chr5:159870611	A=0.629, G=0.371	0.40286695092152	1	0.62278	0.0142457	0.01-0.018	1e-12	rs2910211	miR-146a-5p
rs2910211	Allergic disease (asthma, hay fever or eczema)	29083406	rs2910162	chr5:159909345	A=0.327, G=0.673	0.239175404816762	0.699726773865193	0.68	1.033	1.02-1.04	3e-09	rs2910211	miR-146a-5p
rs2910211	Asthma	32296059	rs61665417	chr5:159918335	C=0.725, T=0.275	0.130247511200168	0.456591114238399	0.71	NA	NA	1e-12	rs2910211	miR-146a-5p
rs61665417	eosinophil (fraction, mean, inv-norm transformed)	39024449	rs2431097	chr5:159890885	C=0.494, T=0.506	0.223239772321413	0.757406396062216	0.574	0.02629	0.02-0.033	4e-16	rs61665417	miR-146a-3p
rs61665417	eosinophil (fraction, maximum, inv-norm transformed)	39024449	rs2431097	chr5:159890885	C=0.494, T=0.506	0.223239772321413	0.757406396062216	0.574	0.02317	0.017-0.029	7e-14	rs61665417	miR-146a-3p
rs61665417	eosinophil (absolute count, mean, inv-norm transformed)	39024449	rs2431097	chr5:159890885	C=0.494, T=0.506	0.223239772321413	0.757406396062216	0.5735	0.02239	0.016-0.029	1e-11	rs61665417	miR-146a-3p
rs61665417	Allergic disease (asthma, hay fever or eczema)	29083406	rs2910162	chr5:159909345	A=0.327, G=0.673	0.571792093429966	0.855158402167131	0.68	1.033	1.02-1.04	3e-09	rs61665417	miR-146a-3p
rs61665417	Allergic disease (asthma, hay fever or eczema)	31361310	rs2961920	chr5:159911506	A=0.773, C=0.227	0.752704589687864	0.987894977498616	0.7653	1.05597	1.04-1.07	3e-17	rs61665417	miR-146a-3p
rs61665417	Asthma	31361310	rs2961920	chr5:159911506	A=0.773, C=0.227	0.752704589687864	0.987894977498616	0.2347	NA	NA	3e-09	rs61665417	miR-146a-3p
rs61665417	Hay fever and/or eczema	31361310	rs4921290	chr5:159914240	A=0.774, T=0.226	0.75759960538755	0.993920825704151	0.7659	1.06022	1.05-1.07	1e-16	rs61665417	miR-146a-3p
rs61665417	Allergic rhinitis	31361310	rs4921290	chr5:159914240	A=0.774, T=0.226	0.75759960538755	0.993920825704151	0.7691	1.09158	1.06-1.12	6e-11	rs61665417	miR-146a-3p
rs61665417	Asthma	32296059	rs4921290	chr5:159914240	A=0.774, T=0.226	0.75759960538755	0.993920825704151	0.759115	1.04912	1.03479053213545-1.06364461148588	8e-12	rs61665417	miR-146a-3p
rs61665417	Eczema	30595370	rs17057868	chr5:159914665	C=0.226, T=0.774	0.75759960538755	0.993920825704151	NR	NA	NA	1e-15	rs61665417	miR-146a-3p
rs61665417	Asthma	32296059	rs61665417	chr5:159918335	C=0.725, T=0.275	1	1	0.71	NA	NA	1e-12	rs61665417	miR-146a-3p
rs9639523	BMI and adiposity (confirmatory factor analysis Factor 7)	38965376	rs2122823	chr7:25939161	C=0.783, T=0.217	0.234342088321454	0.644498810737343	NR	NA	NA	1e-09	rs9639523	miR-148a-3p
rs9639523	Waist circumference adjusted for body mass index	31669095	rs2122823	chr7:25939161	C=0.783, T=0.217	0.234342088321454	0.644498810737343	NR	NA	NA	9e-09	rs9639523	miR-148a-3p
rs9639523	Hip circumference adjusted for BMI	34021172	rs2122823	chr7:25939161	C=0.783, T=0.217	0.234342088321454	0.644498810737343	NR	0.019705	0.013-0.027	2e-08	rs9639523	miR-148a-3p
rs9639523	Waist-to-hip ratio adjusted for BMI	34021172	rs2122823	chr7:25939161	C=0.783, T=0.217	0.234342088321454	0.644498810737343	NR	0.0290705	0.022-0.036	9e-17	rs9639523	miR-148a-3p
rs9639523	Waist-to-hip ratio adjusted for BMI	31669095	rs2122823	chr7:25939161	C=0.783, T=0.217	0.234342088321454	0.644498810737343	NR	NA	NA	4e-17	rs9639523	miR-148a-3p
rs9639523	Waist-to-hip ratio adjusted for BMI	28552196	rs56762262	chr7:25991411	G=0.949, T=0.051	0.108903687066007	1	0.0524	0.0882	0.05-0.127	8e-06	rs9639523	miR-148a-3p
rs9639523	Triglyceride levels x alcohol consumption (regular vs non-regular drinkers) interaction (2df)	30698716	rs4722551	chr7:25991826	C=0.172, T=0.828	0.101841625539105	1	NR	NA	NA	2e-08	rs9639523	miR-148a-3p
rs9639523	Triglyceride levels x alcohol consumption (regular vs non-regular drinkers) interaction (2df)	30698716	rs4722551	chr7:25991826	C=0.172, T=0.828	0.101841625539105	1	NR	NA	NA	4e-11	rs9639523	miR-148a-3p
rs9639523	LDL cholesterol levels x alcohol consumption (regular vs non-regular drinkers) interaction (2df)	30698716	rs4722551	chr7:25991826	C=0.172, T=0.828	0.101841625539105	1	NR	NA	NA	9e-16	rs9639523	miR-148a-3p
rs9639523	LDL cholesterol levels x alcohol consumption (drinkers vs non-drinkers) interaction (2df)	30698716	rs4722551	chr7:25991826	C=0.172, T=0.828	0.101841625539105	1	NR	NA	NA	7e-13	rs9639523	miR-148a-3p
rs9639523	LDL cholesterol levels x alcohol consumption (drinkers vs non-drinkers) interaction (2df)	30698716	rs4722551	chr7:25991826	C=0.172, T=0.828	0.101841625539105	1	NR	NA	NA	2e-18	rs9639523	miR-148a-3p
rs9639523	Triglyceride levels x alcohol consumption (drinkers vs non-drinkers) interaction (2df)	30698716	rs4722551	chr7:25991826	C=0.172, T=0.828	0.101841625539105	1	NR	NA	NA	4e-12	rs9639523	miR-148a-3p
rs9639523	Triglyceride levels x alcohol consumption (drinkers vs non-drinkers) interaction (2df)	30698716	rs4722551	chr7:25991826	C=0.172, T=0.828	0.101841625539105	1	NR	NA	NA	2e-09	rs9639523	miR-148a-3p
rs9639523	LDL cholesterol levels x alcohol consumption (regular vs non-regular drinkers) interaction (2df)	30698716	rs4722551	chr7:25991826	C=0.172, T=0.828	0.101841625539105	1	NR	NA	NA	2e-12	rs9639523	miR-148a-3p
rs9639523	LDL (weighted GWA)	37106081	rs4722551	chr7:25991826	C=0.172, T=0.828	0.101841625539105	1	NR	0.032261	0.022-0.043	1e-09	rs9639523	miR-148a-3p
Note: NA, Not avaliable
